# Supplementary material
Source: PubMed Central journal article supplement (PMC7070179)

Supporting Information

**Cobalt-Catalyzed Aminocarbonylation of Alkyl Tosylates: Stereo-specific Synthesis of Amides**

*Brendon T. Sargent and Erik J. Alexanian\**

anie\_201905173\_sm\_miscellaneous\_information.pdf

## Supporting Information

### Table of Contents

|                                              |          |
|----------------------------------------------|----------|
| General Methods and Materials                | S2-3     |
| List of Abbreviations                        | S3       |
| Substrate Preparation                        | S4-S25   |
| Cobalt-Catalyzed Aminocarbonylations         | S26-S65  |
| Post-Reaction Transformations                | S66-S69  |
| Mechanistic Experiments                      | S70-S71  |
| References                                   | S72      |
| $^1\text{H}$ and $^{13}\text{C}$ NMR Spectra | S73-S113 |

## General Methods and Materials

Proton and carbon magnetic resonance spectra ( $^1\text{H}$  NMR and  $^{13}\text{C}$  NMR) were recorded on a Bruker Avance III 600 CryoProbe ( $^1\text{H}$  NMR 600 MHz and  $^{13}\text{C}$  at 151 MHz) spectrometer with solvent resonance as the internal standard ( $^1\text{H}$  NMR:  $\text{CHCl}_3$  at 7.285 ppm;  $^{13}\text{C}$  NMR:  $\text{CDCl}_3$  at 77.0 ppm).  $^1\text{H}$  NMR data are reported as follows: chemical shift (ppm), multiplicity (s = singlet, br s = broad singlet, d = doublet, t = triplet, q = quartet, m = multiplet), coupling constants (Hz), and integration. High-resolution mass spectrometry samples were analyzed with a hybrid LTQ FT (ICR 7T) (ThermoFisher, Bremen, Germany) mass spectrometer. Samples were introduced via a microelectrospray at a flow rate of 10  $\mu\text{L}/\text{min}$  in methanol. Xcalibur (ThermoFisher, Bremen, Germany) was used to analyze the data. HPLC analysis was performed on a Shimadzu SPD-M20A photodiode array (PDA) system equipped with Daicel Chiralpak IE, IF, IG, and OJ-H (4.6 mm x 250 mm x 5  $\mu\text{m}$ ) columns using a flow rate of 1 mL/min, unless otherwise indicated, with hexanes and isopropanol as eluent. Chiral supercritical fluid chromatography analysis was performed on a Waters Acquity UPC2 instrument at 35  $^\circ\text{C}$  equipped with Phenomenex Lux Cellulose-1, Cellulose-2, and Cellulose-3 (4.6 mm x 150 mm x 5  $\mu\text{m}$ ) columns using a flow rate of 2 mL/min with hexanes and isopropanol or methanol as eluent.

Analytical thin layer chromatography (TLC) was performed on SiliaPlate 250 $\mu\text{m}$  thick silica gel purchased from Silicycle. Visualization was accomplished with short-wave UV light (254 nm), iodine, Hanessian's stain, or ethanolic acidic p-anisaldehyde solution followed by heating when necessary. Purification of the reaction products was carried out by flash chromatography using Siliaflash P60 silica gel (40-63 $\mu\text{m}$ ) purchased from Silicycle. Carbon monoxide, Research Purity 99.99% (part number CM R200) was purchased from Airgas. Tetrahydrofuran, diethyl ether, *N,N*-dimethylformamide, acetonitrile, and dichloromethane were dried by passage through a column of neutral alumina under nitrogen prior to use. *t*-Amyl alcohol was sparged with argon before storage over 3  $\text{Å}$  molecular sieves in an argon filed glovebox.  $\text{Co}_2(\text{CO})_{10}$  was purchased from Strem Chemicals, stored in a glovebox at -30  $^\circ\text{C}$ , and used as received.  $\text{K}[\text{Co}(\text{CO})_4]$  was synthesized according to Ellis and co-workers.<sup>[1]</sup> All liquid amine nucleophiles and 2,2,6,6-tetramethylpiperidine were distilled prior to being stored in a glovebox. All other reagents were obtained from commercial sources and used without further purification, unless otherwise noted. In addition, all reactions were carried out under an atmosphere of dry argon in flame or oven-dried glassware with magnetic stirring. The pressure reactors used were purchased from Parr Instrument Company.

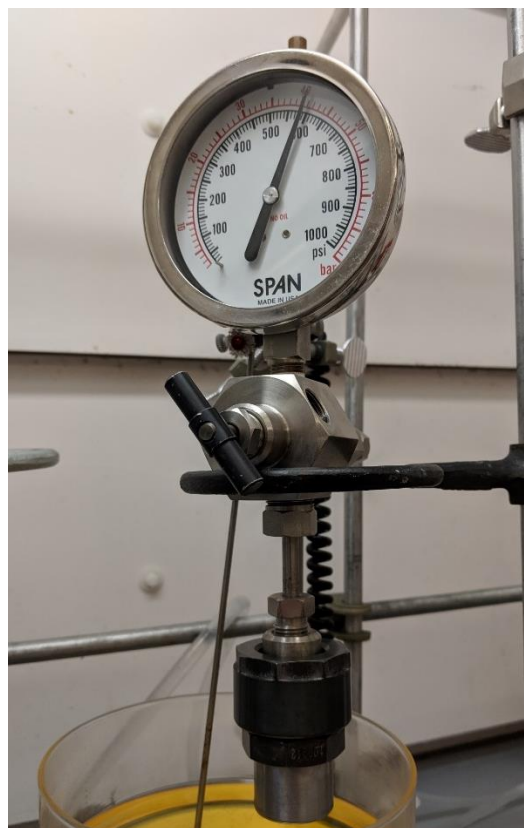

Parr reactor for aminocarbonylation

### List of Abbreviations

DCM = dichloromethane

DIAD = diisopropyl azodicarboxylate

DMAP = 4-dimethylaminopyridine

DMF = *N,N*-dimethylformamide

EtOAc = ethyl acetate

MeCN = acetonitrile

Pin = pinacol

TBAF = tetrabutylammonium fluoride

TBS = *tert*-butyldimethylsilyl

TEA = triethylamine

THF = tetrahydrofuran

TMP = 2,2,6,6-tetramethylpiperidine

TsCl = 4-toluenesulfonyl chloride

## Substrate Preparation

### General Procedure A: Tosylation of Secondary Alcohols.

Tosylates were synthesized using a modified procedure from Tanabe, et. al.<sup>[2]</sup> To a 0 °C ice bath cooled solution of TsCl (1.5 equiv) and trimethylamine hydrochloride (0.1 equiv) in DCM (1 M with respect to the alcohol) was added TEA (2.5 equiv) dropwise. To this solution was added a solution of the alcohol in DCM (1 M), the solution was then stirred for 1 hour at 0 °C, monitoring by TLC. The reaction was quenched by addition of *N,N*-dimethyldiaminopropane (2.0 equiv) and stirred for 20 additional minutes while warming to room temperature. The reaction mixture was poured into water and separated. The organic layer was washed sequentially with 1 M HCl, a saturated aqueous solution of NaHCO<sub>3</sub>, and brine, dried over MgSO<sub>4</sub>, filtered, and concentrated under reduced pressure. The crude product was purified by flash chromatography.

### General Procedure B: Mitsunobu of Phenols

This procedure was adapted from Lepore and He.<sup>[3]</sup> The corresponding alcohol (1.05 equiv), substituted phenol (1 equiv), and triphenylphosphine (1.05 equiv) were dissolved in toluene (0.25 M) and sonicated for 5 minutes. DIAD (1.05 equiv) was added dropwise over the course of 3 minutes and the reaction was sonicated for 1 hour until complete consumption of the phenol, monitored by TLC. The solution was concentrated under reduced pressure and the crude product was purified by flash chromatography.

### General Procedure C: Acylation of Primary Alcohols

To a mixture of primary alcohol (1 equiv), DMAP (0.2 equiv), and TEA (2 equiv) in DCM (0.4 M) was added the respective acid chloride (1.1 equiv, 1 M in DCM) dropwise at 0 °C. The reaction mixture was stirred at 0 °C for 30 minutes, then warmed to room temperature and stirred 2-16 hours. Upon completion of the reaction, the mixture was quenched with a saturated solution of NaHCO<sub>3</sub> and extracted 3 times with DCM. The organic layers were combined, dried over MgSO<sub>4</sub>, filtered, and concentrated under reduced pressure. The crude material was purified by column chromatography.

### General Procedure D: TBS Deprotection

To a solution of TBS protected alcohol (1 equiv) in THF (0.5 M) was added 1 M TBAF in THF (2 equiv) and heated to 55 °C ON. After completion of reaction, the mixture was cooled to room temperature, diluted with water, and extracted twice with EtOAc. The combined organic layers were washed twice with water, once with brine, dried over MgSO<sub>4</sub>, filtered, and concentrated under reduced pressure. The crude material was purified by column chromatography.

### General Procedure E: TBS Deprotection

This procedure was adapted from Martinez-Solorio and Jennings.<sup>[4]</sup> To a solution of TBS protected alcohol (1 equiv) in MeOH (0.1 M) was added pyridinium perbromide (5 mol %) at 0 °C. The solution was allowed to stir overnight, warming to room temperature. After completion of reaction, the solution was quenched with a saturated aqueous solution of NaHCO<sub>3</sub>, and extracted three times with EtOAc. The combined organic layers were dried over MgSO<sub>4</sub>, filtered, and concentrated under reduced pressure. The crude material was purified by column chromatography.

### Tosylates:

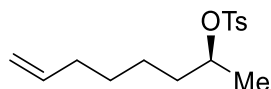

**(S)-oct-7-en-2-yl 4-methylbenzenesulfonate (SI-1)** was prepared in 97% ee according to a published procedure; physical and spectral data were in accordance with literature data.<sup>[5]</sup>

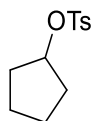

**Cyclopentyl 4-methylbenzenesulfonate (SI-2)** was prepared according to a published procedure; physical and spectral data were in accordance with literature data.<sup>[6]</sup>

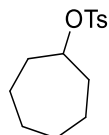

**Cycloheptyl 4-methylbenzenesulfonate (SI-3)** was prepared according to a published procedure; physical and spectral data were in accordance with literature data.<sup>[6]</sup>

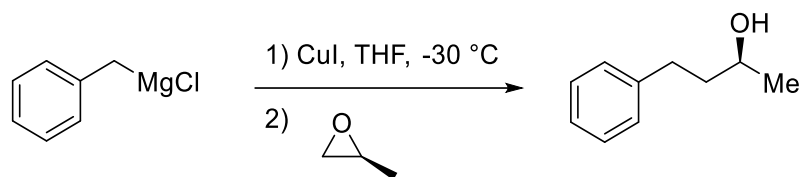

**(S)-4-phenylbutan-2-yl 4-methylbenzenesulfonate (SI-4)** was prepared using a modified literature procedure.<sup>[5]</sup> Benzylmagnesium chloride (13 mL, 26 mmol, 2.0 M THF) was added dropwise to a -30 °C suspension of CuI (4.9 g, 26 mmol) in THF (38 mL) and stirred for 5 minutes. (S)-Propylene oxide (1.2 mL, 17 mmol) was added and the reaction was warmed to 0 °C and stirred for an additional 2.5 hours. The reaction was then quenched with an aqueous saturated solution of NH<sub>4</sub>Cl and warmed to room temperature. Ether was added and the mixture was filtered through Celite before the layers were separated. The organic layer was washed sequentially with a saturated aqueous solution of NaHCO<sub>3</sub>, then brine, dried over MgSO<sub>4</sub>, filtered, and concentrated under reduced pressure. The crude product was purified by flash chromatography in 20% EtOAc/hexanes to provide 2.5 g (98%) of **SI-4** as a pale yellow oil. Physical and spectral data were in accordance with literature data.<sup>[7]</sup>

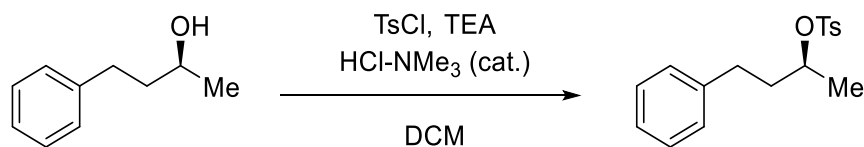

**(S)-4-phenylbutan-2-yl 4-methylbenzenesulfonate (1)** was synthesized by tosylating **SI-4** (2.0 g, 13 mmol) according to General Procedure A. The crude product was purified via flash chromatography in 10% EtOAc/hexanes to provide 3.7 g (91%) of tosylate **1** as a colorless oil. Physical and spectral data were in accordance with literature data.<sup>[5]</sup> **Chiral HPLC** (Daicel OJ-H, 70:30 hexanes:isopropanol): ee = 99%.

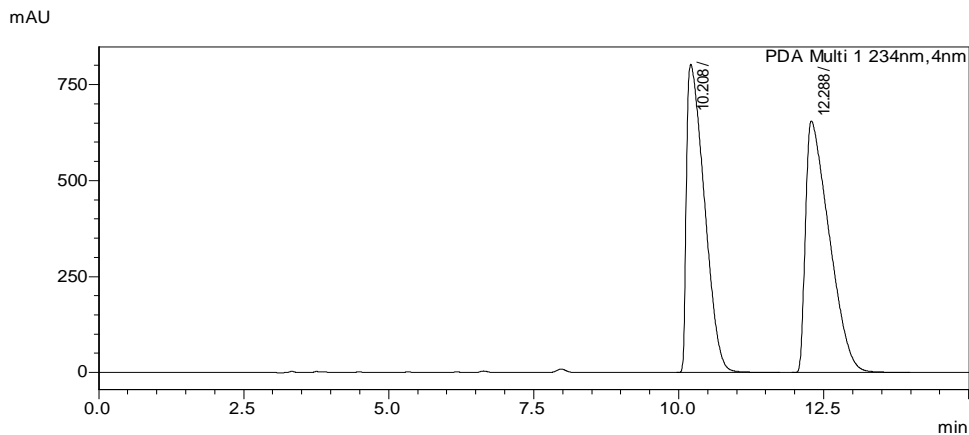

| Peak# | Ret. Time | Area     | Area%  |
|-------|-----------|----------|--------|
| 1     | 10.208    | 17241843 | 48.127 |
| 2     | 12.288    | 18584150 | 51.873 |
| Total |           | 35825993 | 100    |

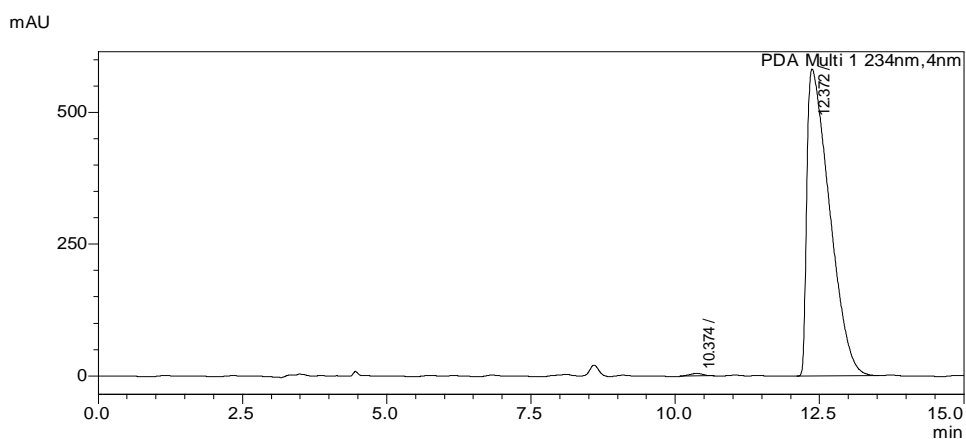

| Peak# | Ret. Time | Area     | Area%  |
|-------|-----------|----------|--------|
| 1     | 10.374    | 83943    | 0.526  |
| 2     | 12.372    | 15862476 | 99.474 |
| Total |           | 15946419 | 100    |

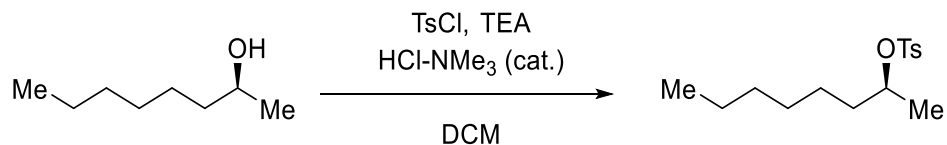

**(S)-octan-2-yl 4-methylbenzenesulfonate (SI-5)** was synthesized by tosylating (S)-2-octanol (1.6 g, 12 mmol) according to General Procedure A. The crude product was purified via flash chromatography in 10% EtOAc/hexanes to provide 3.2 g (94%) of



tosylate **SI-5** as a colorless oil. Physical and spectral data were in accordance with literature data.<sup>[6]</sup> **Chiral HPLC** (Chiralpak IE, 95:5 hexanes:isopropanol): ee = >99%.

mAU

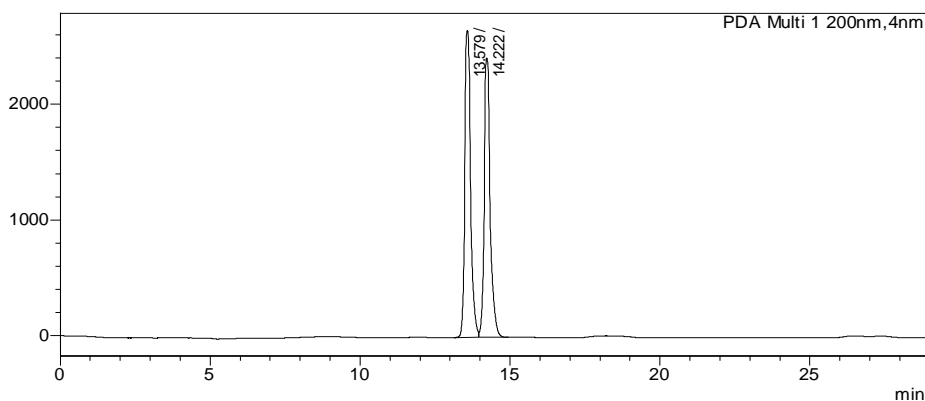

| Peak# | Ret. Time | Area     | Area%  |
|-------|-----------|----------|--------|
| 1     | 13.579    | 35789238 | 51.792 |
| 2     | 14.222    | 33312280 | 48.208 |
| Total |           | 69101518 | 100    |

mAU

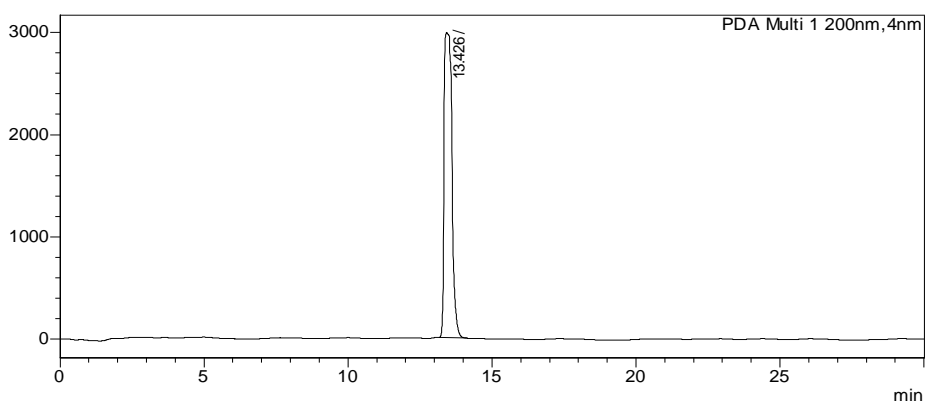

| Peak# | Ret. Time | Area     | Area% |
|-------|-----------|----------|-------|
| 1     | 13.426    | 56057566 | 100   |
| Total |           | 56057566 | 100   |

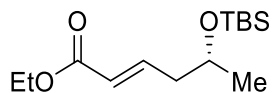

**Ethyl (R,E)-5-((tert-butyldimethylsilyl)oxy)hex-2-enoate (SI-6)** was prepared according to a published procedure; physical and spectral data were in accordance with literature data.<sup>[8]</sup>

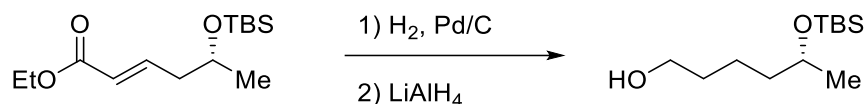

**(R)-5-((tert-butyldimethylsilyl)oxy)hexan-1-ol (SI-7)** was synthesized by the 2 step sequence shown above. 10% w/w palladium on carbon (5.4 g) was suspended in EtOH and **SI-6** (27 g, 99 mmol) was added. The flask was evacuated and back-filled with hydrogen. The reaction was allowed to stir overnight at room temperature under a balloon of hydrogen. The reaction was filtered through Celite and concentrated under reduced pressure to provide 23.7 g of the crude product (87%). A solution of the crude product (23.7 g, 86.3 mmol) in Et<sub>2</sub>O (50 mL) was added dropwise to a suspension of LiAlH<sub>4</sub> (3.28 g, 86.3 mmol) in Et<sub>2</sub>O (125 mL) at 0 °C. The reaction mixture was allowed to warm to room temperature and stirred overnight. The reaction was cooled to 0 °C and quenched by sequential dropwise addition of water (3.3 mL), 3 M NaOH (3.3 mL), and water (9.9 mL). The slurry was warmed to room temperature, dried with MgSO<sub>4</sub>, filtered through a pad of Celite, and concentrated under reduced pressure. Crude product **SI-7** (19.5 g, 97%) was used without further purification. Physical and spectral data were in accordance with literature data.<sup>[8]</sup>

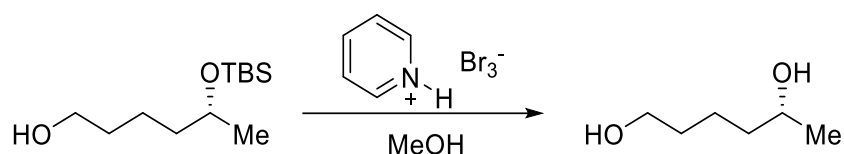

**(R)-hexane-1,5-diol (SI-8)** was synthesized by subjecting **SI-7** (2.0 g, 8.6 mmol) to General Procedure E. The crude product was purified via flash chromatography using a gradient of 75-100% EtOAc/hexanes to provide 0.76 g (75%) of **SI-8** as a colorless oil. Physical and spectral data were in accordance with literature data.<sup>[9]</sup>

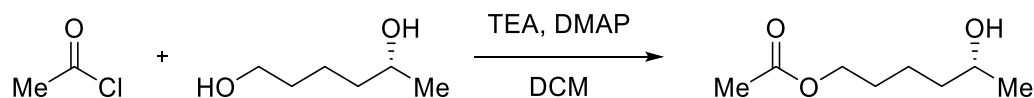

**(R)-5-hydroxyhexyl acetate (SI-9)** was synthesized by subjecting **SI-8** (0.70 g, 5.9 mmol) to General Procedure C. The crude product was purified via flash chromatography

in 30% EtOAc/hexanes to provide 0.62 g (65%) of **SI-9** as a colorless oil. **<sup>1</sup>H NMR** (600 MHz, Chloroform-*d*) δ 4.02 (tt, *J* = 6.7, 1.5 Hz, 2H), 3.74 (qq, *J* = 6.5, 4.4, 3.5 Hz, 1H), 2.23 – 2.14 (m, 1H), 2.01 – 1.96 (m, 3H), 1.65 – 1.53 (m, 2H), 1.48 – 1.28 (m, 4H), 1.14 (dt, *J* = 6.3, 1.6 Hz, 3H). **<sup>13</sup>C NMR** (151 MHz, CDCl<sub>3</sub>) δ 171.3, 67.6, 64.4, 38.7, 28.6, 23.4, 22.1, 20.9. **HRMS** (ESI) calculated for [C<sub>8</sub>H<sub>16</sub>O<sub>3</sub>+H]<sup>+</sup> 161.1178, found 161.1168.

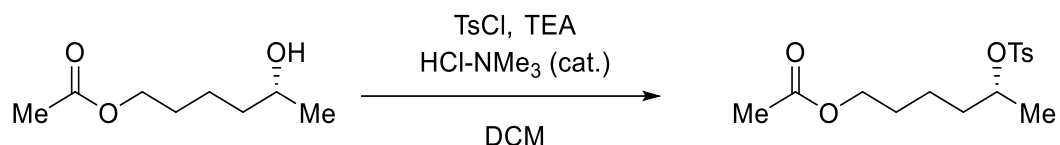

**(R)-5-(tosyloxy)hexyl acetate (SI-10)** was synthesized by tosylating **SI-9** (0.62 g, 3.9 mmol) according to General Procedure A. The crude product was purified via flash chromatography in 20% EtOAc/hexanes to provide 1.0 g (85%) of tosylate **SI-10** as a colorless oil. **<sup>1</sup>H NMR** (600 MHz, Chloroform-*d*) δ 7.84 – 7.79 (m, 2H), 7.36 (d, *J* = 8.0 Hz, 2H), 4.69 – 4.60 (m, 1H), 3.99 (t, *J* = 6.6 Hz, 2H), 2.47 (s, 3H), 2.06 (s, 3H), 1.67 (dddd, *J* = 14.1, 10.4, 7.4, 5.2 Hz, 1H), 1.61 – 1.51 (m, 3H), 1.38 (ddtd, *J* = 13.0, 10.3, 7.4, 5.1 Hz, 1H), 1.33 – 1.22 (m, 4H). **<sup>13</sup>C NMR** (151 MHz, CDCl<sub>3</sub>) δ 171.1, 144.5, 134.6, 129.8, 127.7, 80.1, 64.1, 36.1, 28.1, 21.6, 21.4, 21.0, 20.8. **HRMS** (ESI) calculated for [C<sub>15</sub>H<sub>22</sub>O<sub>5</sub>S+H]<sup>+</sup> 315.1266, found 315.1248. **Chiral HPLC** (Daicel OJ-H, 70:30 hexanes:isopropanol): ee = 93%.

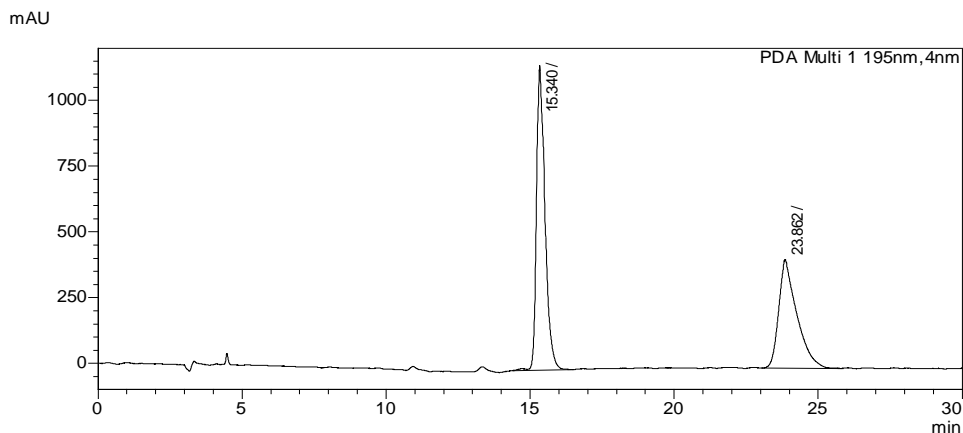

| Peak# | Ret. Time | Area     | Area%  |
|-------|-----------|----------|--------|
| 1     | 15.34     | 23746237 | 57.019 |
| 2     | 23.862    | 17899936 | 42.981 |
| Total |           | 41646173 | 100    |

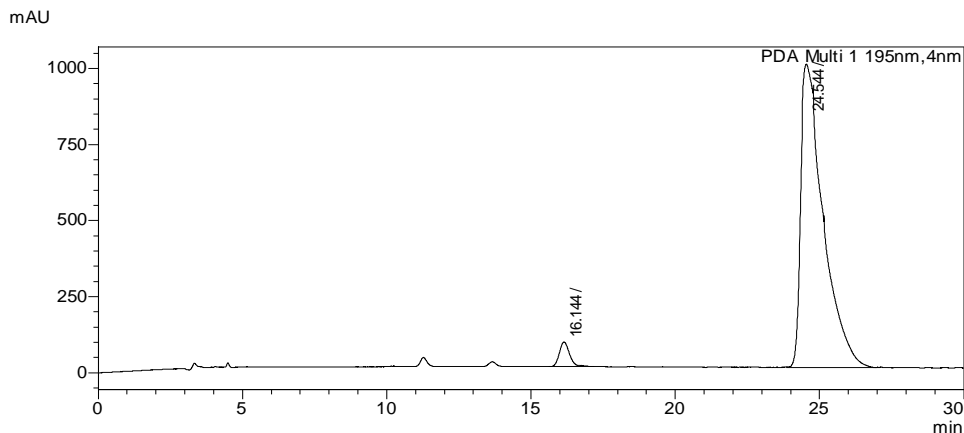

| Peak# | Ret. Time | Area     | Area%  |
|-------|-----------|----------|--------|
| 1     | 16.144    | 2003435  | 3.593  |
| 2     | 24.544    | 53762974 | 96.407 |
| Total |           | 55766409 | 100    |

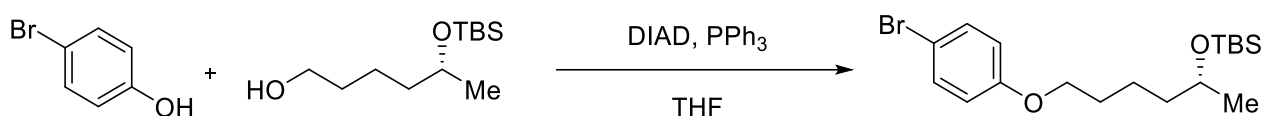

**(R)-((6-(4-bromophenoxy)hexan-2-yl)oxy)(tert-butyl)dimethylsilane (SI-11)** was synthesized by subjecting **SI-7** (0.50 g, 2.2 mmol) and 4-bromophenol (0.35 g, 2.0 mmol) to General Procedure B. The crude product was purified via flash chromatography in 10% EtOAc/hexanes to provide 0.64 g (81%) of **SI-11** as a colorless oil.  $^1\text{H NMR}$  (600 MHz, Chloroform-*d*)  $\delta$  7.41 – 7.32 (m, 2H), 6.82 – 6.75 (m, 2H), 3.94 (t,  $J = 6.5$  Hz, 2H), 3.83 (td,  $J = 6.3, 4.9$  Hz, 1H), 1.84 – 1.74 (m, 2H), 1.59 – 1.41 (m, 4H), 1.15 (d,  $J = 6.1$  Hz, 3H), 0.91 (s, 9H), 0.07 (d,  $J = 2.6$  Hz, 6H).  $^{13}\text{C NMR}$  (151 MHz,  $\text{CDCl}_3$ )  $\delta$  158.2, 132.2, 116.3, 112.6, 68.4, 68.2, 39.4, 29.3, 25.9, 23.8, 22.2, 18.2, -4.3, -4.7. **HRMS** (ESI) calculated for  $[\text{C}_{18}\text{H}_{31}\text{BrO}_2\text{Si}+\text{Na}]^+$  409.1174, found 409.1157.

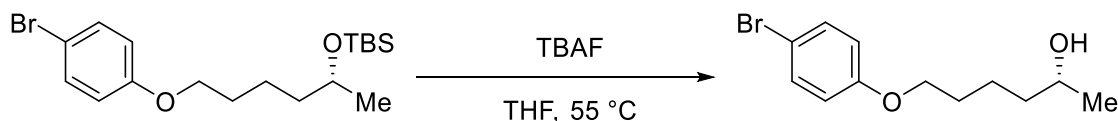

**(R)-6-(4-bromophenoxy)hexan-2-ol (SI-12)** was synthesized by deprotecting **SI-11** (0.75 g, 1.9 mmol) according to General Procedure D. The crude product was purified via flash chromatography in 30% EtOAc/hexanes to provide 0.31 g (59%) of alcohol **SI-12** as an off-white solid.  $^1\text{H NMR}$  (600 MHz, Chloroform-*d*)  $\delta$  7.40 – 7.35 (m, 2H), 6.81 – 6.76

(m, 2H), 3.94 (t,  $J = 6.4$  Hz, 2H), 3.88 – 3.82 (m, 1H), 1.88 – 1.75 (m, 2H), 1.65 – 1.47 (m, 5H), 1.23 (d,  $J = 6.2$  Hz, 3H).  $^{13}\text{C NMR}$  (151 MHz,  $\text{CDCl}_3$ )  $\delta$  158.2, 132.2, 116.3, 112.7, 68.06, 67.97, 38.9, 29.2, 23.6, 22.3. **HRMS** (ESI) calculated for  $[\text{C}_{12}\text{H}_{17}\text{BrO}_2+\text{Na}]^+$  295.0310, found 295.0295.

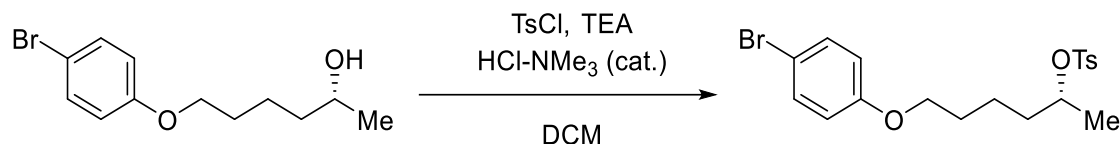

**(R)-6-(4-bromophenoxy)hexan-2-yl 4-methylbenzenesulfonate (SI-13)** was synthesized by tosylating **SI-12** (0.31 g, 1.1 mmol) according to General Procedure A. The crude product was purified via flash chromatography in 20% EtOAc/hexanes to provide 0.47 g (97%) of tosylate **SI-13** as a colorless oil.  $^1\text{H NMR}$  (600 MHz, Chloroform- $d$ )  $\delta$  7.83 – 7.79 (m, 2H), 7.41 – 7.36 (m, 2H), 7.35 – 7.31 (m, 2H), 6.79 – 6.73 (m, 2H), 4.71 – 4.62 (m, 1H), 3.85 (t,  $J = 6.3$  Hz, 2H), 2.43 (s, 3H), 1.75 – 1.66 (m, 3H), 1.64 – 1.55 (m, 1H), 1.52 – 1.42 (m, 1H), 1.42 – 1.32 (m, 1H), 1.28 (d,  $J = 6.3$  Hz, 3H).  $^{13}\text{C NMR}$  (151 MHz,  $\text{CDCl}_3$ )  $\delta$  158.1, 144.5, 134.5, 132.2, 129.8, 127.7, 116.2, 112.7, 80.2, 67.7, 36.2, 28.7, 21.6, 21.5, 20.8. **HRMS** (ESI) calculated for  $[\text{C}_{19}\text{H}_{23}\text{BrO}_4\text{S}+\text{Na}]^+$  449.0398, found 449.0383. **Chiral HPLC** (Daicel OJ-H, 70:30 hexanes:isopropanol): ee = 97%.

mAU

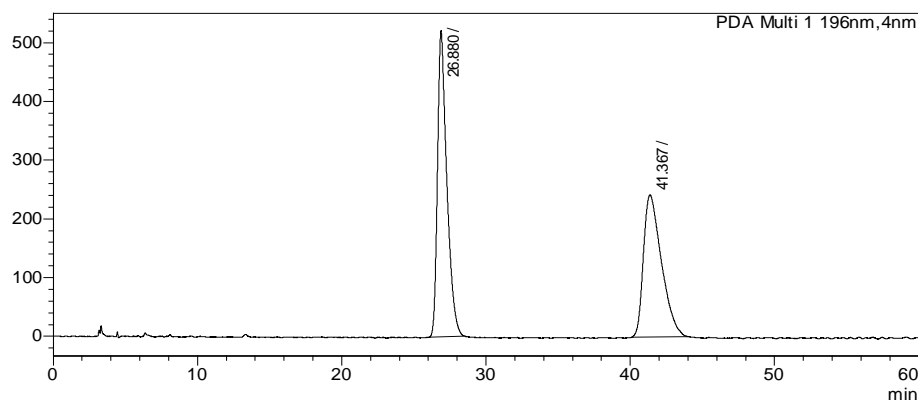

| Peak# | Ret. Time | Area     | Area%  |
|-------|-----------|----------|--------|
| 1     | 26.88     | 23462248 | 52.779 |
| 2     | 41.367    | 20991569 | 47.221 |
| Total |           | 44453817 | 100    |

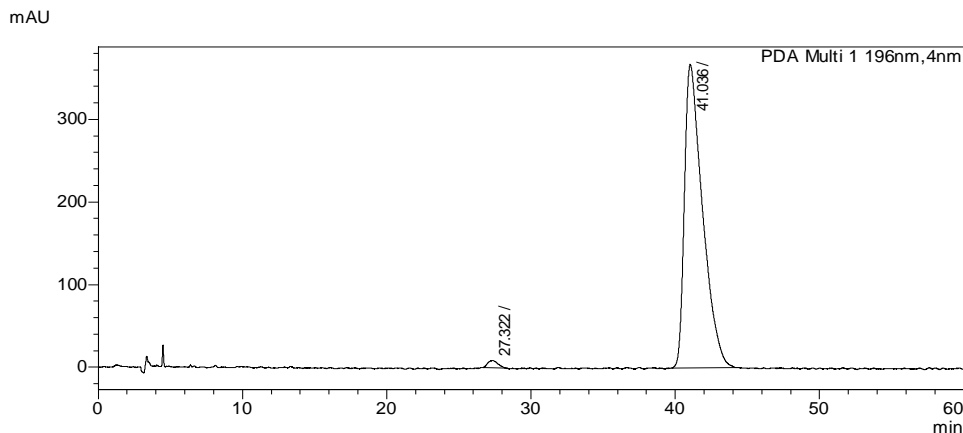

| Peak# | Ret. Time | Area     | Area%  |
|-------|-----------|----------|--------|
| 1     | 27.322    | 430506   | 1.327  |
| 2     | 41.036    | 32020267 | 98.673 |
| Total |           | 32450774 | 100    |

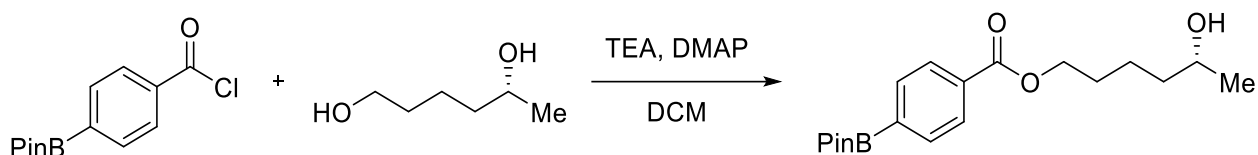

**(R)-5-hydroxyhexyl 4-(4,4,5,5-tetramethyl-1,3,2-dioxaborolan-2-yl)benzoate (SI-14)**

was synthesized by first preparing the acid chloride by dissolving 4-carboxyphenylboronic acid pinacol ester (5.0 g, 20 mmol) and 2 drops of DMF in DCM (60 mL) at 0 °C. Oxalyl chloride (2.6 mL, 30 mmol) was added dropwise and the reaction was stirred for 15 minutes before warming to room temperature and stirring for 1 hour. The mixture was evaporated to dryness and the acid chloride was used crude as an orange solid in the subsequent step. The title compound was synthesized by subjecting **SI-7** (0.76 g, 6.4 mmol) to General Procedure C. The crude product was purified via flash chromatography using a gradient of 20-30% EtOAc/hexanes to provide 1.4 g (63%) of **SI-14** as an orange oil. <sup>1</sup>H NMR (600 MHz, Chloroform-*d*) δ 8.05 – 8.01 (m, 2H), 7.90 – 7.86 (m, 2H), 4.35 (t, *J* = 6.6 Hz, 2H), 3.85 (q, *J* = 6.1 Hz, 1H), 1.83 (dtt, *J* = 12.5, 10.0, 6.5 Hz, 2H), 1.64 – 1.48 (m, 4H), 1.47 (br s, 1H), 1.37 (s, 12H), 1.22 (d, *J* = 6.2 Hz, 3H). <sup>13</sup>C NMR (151 MHz, CDCl<sub>3</sub>) δ 166.7, 134.7, 132.6, 128.6, 84.2, 67.9, 65.0, 38.8, 28.7, 24.9, 23.62, 22.3. HRMS (ESI) calculated for [C<sub>19</sub>H<sub>29</sub>BO<sub>5</sub>+H]<sup>+</sup> 349.2186, found 349.2196.

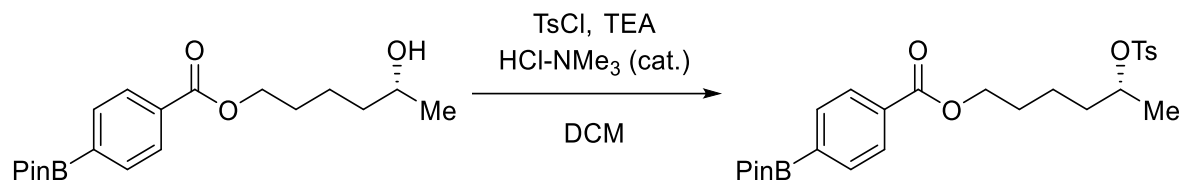

**(R)-5-(tosyloxy)hexyl 4-(4,4,5,5-tetramethyl-1,3,2-dioxaborolan-2-yl)benzoate (SI-15)** was synthesized by tosylating **SI-14** (1.4 g, 4.4 mmol) according to General Procedure A. The crude product was purified via flash chromatography in 20% EtOAc/hexanes to provide 1.5 g (72%) of tosylate **SI-15** as a viscous, pale yellow oil. **<sup>1</sup>H NMR** (600 MHz, Chloroform-*d*) δ 8.04 – 7.99 (m, 2H), 7.92 – 7.88 (m, 2H), 7.83 – 7.78 (m, 2H), 7.31 (d, *J* = 8.0 Hz, 2H), 4.70 – 4.61 (m, 1H), 4.23 (tt, *J* = 6.6, 3.4 Hz, 2H), 2.43 (s, 3H), 1.75 – 1.64 (m, 3H), 1.64 – 1.55 (m, 1H), 1.52 – 1.40 (m, 1H), 1.39 (s, 12H), 1.36 – 1.31 (m, 0H), 1.36 – 1.29 (m, 4H). **<sup>13</sup>C NMR** (151 MHz, CDCl<sub>3</sub>) δ 166.6, 144.6, 134.7, 134.4, 132.5, 129.8, 128.6, 127.7, 84.2, 80.1, 64.7, 36.1, 28.2, 24.9, 21.63, 21.56, 21.0. **HRMS** (ESI) calculated for [C<sub>26</sub>H<sub>35</sub>BO<sub>7</sub>S+H]<sup>+</sup> 503.2275, found 503.2259. **Chiral HPLC** (Chiralpak IF, 95:5 (2 mL/min) hexanes:isopropanol): ee = 92%.

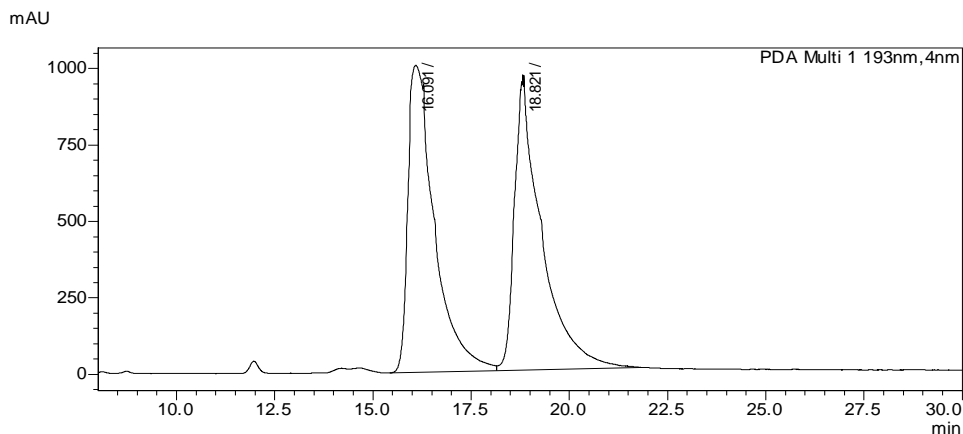

| Peak# | Ret. Time | Area      | Area%  |
|-------|-----------|-----------|--------|
| 1     | 16.091    | 62877023  | 50.688 |
| 2     | 18.822    | 61169201  | 49.312 |
| Total |           | 124046224 | 100    |

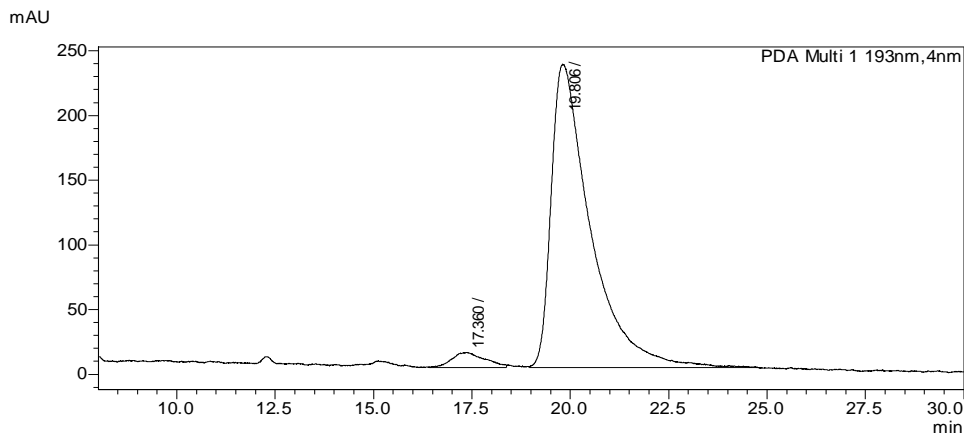

| Peak# | Ret. Time | Area     | Area%  |
|-------|-----------|----------|--------|
| 1     | 17.36     | 682114   | 4.013  |
| 2     | 19.806    | 16313494 | 95.987 |
| Total |           | 16995609 | 100    |

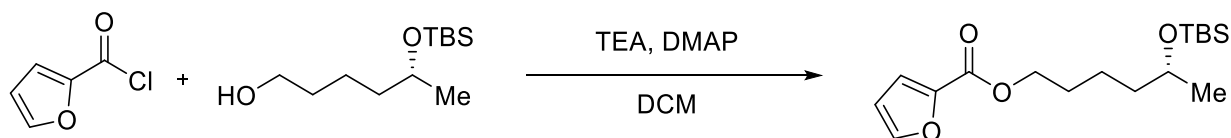

**(R)-5-((tert-butyldimethylsilyloxy)hexyl furan-2-carboxylate (SI-16)** was synthesized by subjecting **SI-7** (1.0 g, 4.3 mmol) and furan-2-carbonyl chloride (0.47 mL, 4.7 mmol) to General Procedure C. The crude product was purified via flash chromatography in 15% EtOAc/hexanes to provide 1.3 g (93%) of **SI-16** as a colorless oil. **<sup>1</sup>H NMR** (600 MHz, Chloroform-*d*)  $\delta$  7.59 (dt,  $J = 1.8, 0.9$  Hz, 1H), 7.18 (dt,  $J = 3.6, 0.9$  Hz, 1H), 6.52 (dt,  $J = 2.9, 1.4$  Hz, 1H), 4.32 (td,  $J = 6.7, 1.0$  Hz, 2H), 3.86 – 3.78 (m, 1H), 1.82 – 1.71 (m, 2H), 1.63 – 1.38 (m, 4H), 1.15 (dd,  $J = 6.0, 1.0$  Hz, 3H), 0.90 (d,  $J = 1.2$  Hz, 9H), 0.08 – 0.04 (m, 6H). **<sup>13</sup>C NMR** (151 MHz, CDCl<sub>3</sub>)  $\delta$  158.9, 146.2, 144.9, 117.7, 111.8, 68.4, 65.0, 39.3, 28.8, 25.9, 23.8, 22.2, 18.1, -4.4, -4.8. **HRMS** (ESI) calculated for [C<sub>17</sub>H<sub>30</sub>O<sub>4</sub>Si+H]<sup>+</sup> 327.1992, found 327.1976.

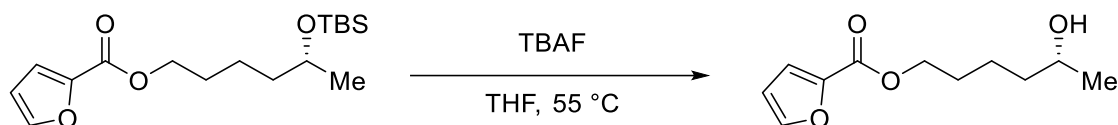

**(R)-5-hydroxyhexyl furan-2-carboxylate (SI-17)** was synthesized by subjecting **SI-16** (1.3 g, 4.0 mmol) to General Procedure D. The crude product was purified via flash



chromatography in 30% EtOAc/hexanes to provide 0.6 g (71%) of **SI-17** as a colorless oil. **<sup>1</sup>H NMR** (600 MHz, Chloroform-*d*) δ 7.53 – 7.49 (m, 1H), 7.10 (dd, *J* = 3.6, 1.0 Hz, 1H), 6.43 (dd, *J* = 3.6, 1.8 Hz, 1H), 4.23 (t, *J* = 6.8 Hz, 2H), 3.77 – 3.69 (m, 1H), 2.33 (s, 1H), 1.77 – 1.63 (m, 2H), 1.54 – 1.32 (m, 4H), 1.11 (d, *J* = 6.5 Hz, 3H). **<sup>13</sup>C NMR** (151 MHz, CDCl<sub>3</sub>) δ 158.8, 146.2, 144.7, 117.8, 111.8, 67.6, 64.9, 38.7, 28.6, 23.4, 22.1. **HRMS** (ESI) calculated for [C<sub>11</sub>H<sub>16</sub>O<sub>4</sub>+H]<sup>+</sup> 213.1127, found 213.1114.

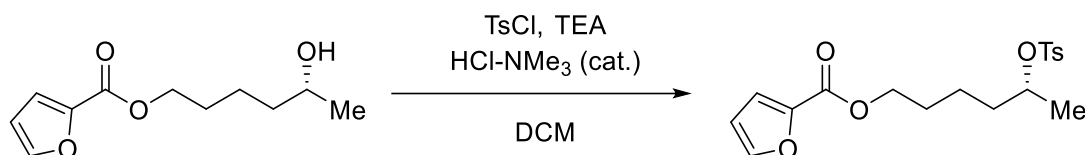

**(R)-5-(tosyloxy)hexyl furan-2-carboxylate (SI-18)** was synthesized by tosylating **SI-17** (0.57 g, 2.7 mmol) according to General Procedure A. The crude product was purified via flash chromatography in 25% EtOAc/hexanes to provide 0.75 g (76%) of tosylate **SI-18** as a colorless oil. **<sup>1</sup>H NMR** (600 MHz, Chloroform-*d*) δ 7.83 – 7.77 (m, 2H), 7.60 (dd, *J* = 1.8, 0.8 Hz, 1H), 7.36 – 7.30 (m, 2H), 7.18 (dd, *J* = 3.5, 0.9 Hz, 1H), 6.53 (dd, *J* = 3.5, 1.7 Hz, 1H), 4.68 – 4.60 (m, 1H), 4.21 (td, *J* = 6.6, 0.9 Hz, 2H), 2.44 (s, 3H), 1.73 – 1.61 (m, 3H), 1.61 – 1.53 (m, 1H), 1.47 – 1.36 (m, 1H), 1.35 – 1.25 (m, 4H). **<sup>13</sup>C NMR** (151 MHz, CDCl<sub>3</sub>) δ 158.7, 146.3, 144.7, 144.6, 134.5, 129.8, 127.7, 117.9, 111.9, 80.1, 64.5, 36.1, 28.2, 21.6, 21.4, 20.9 **HRMS** (ESI) calculated for [C<sub>18</sub>H<sub>22</sub>O<sub>6</sub>S+H]<sup>+</sup> 367.1215, found 367.1196. **Chiral HPLC** (Daicel OJ-H, 70:30 hexanes:isopropanol): ee = 98%.

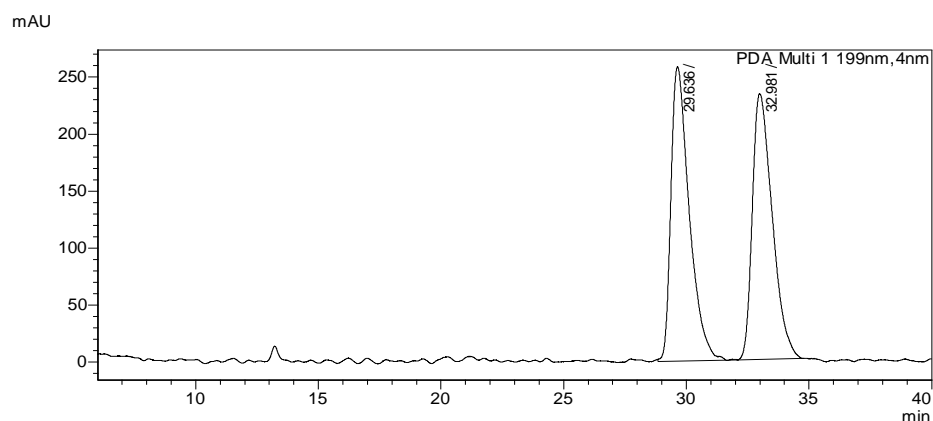

| Peak# | Ret. Time | Area     | Area%  |
|-------|-----------|----------|--------|
| 1     | 29.636    | 13393753 | 50.459 |
| 2     | 32.981    | 13149822 | 49.541 |
| Total |           | 26543575 | 100    |

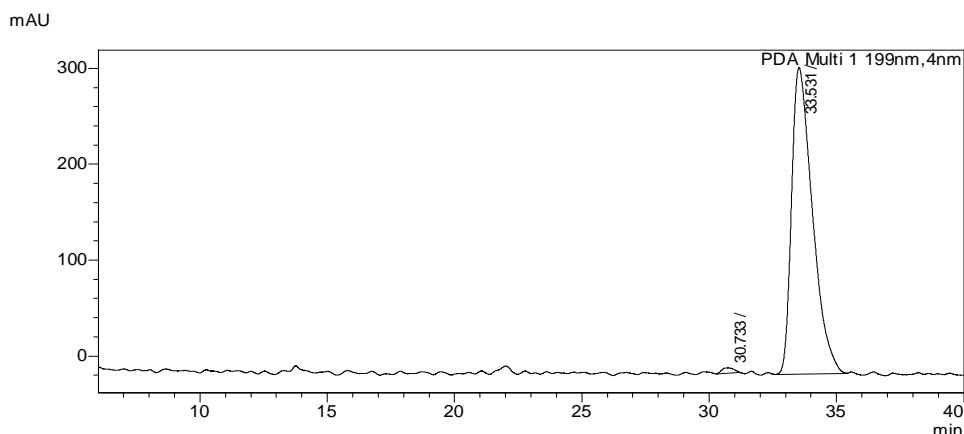

| Peak# | Ret. Time | Area     | Area%  |
|-------|-----------|----------|--------|
| 1     | 30.733    | 187755   | 1.021  |
| 2     | 33.531    | 18204952 | 98.979 |
| Total |           | 18392707 | 100    |

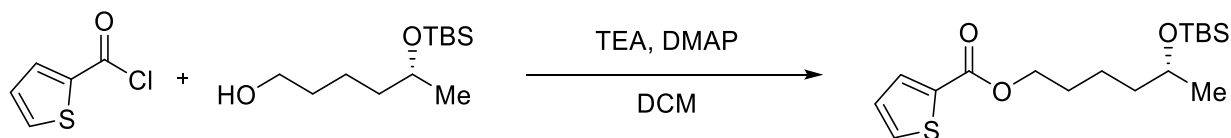

**(R)-5-((tert-butyldimethylsilyl)oxy)hexyl thiophene-2-carboxylate (SI-19)** was synthesized by subjecting **SI-7** (2.0 g, 8.6 mmol) and thiophene-2-carbonyl chloride (1.0 mL, 9.5 mmol) to General Procedure C. The crude product was purified via flash chromatography in 5% EtOAc/hexanes to provide 2.6 g (88%) of **SI-19** as a colorless liquid. **<sup>1</sup>H NMR** (600 MHz, Chloroform-*d*)  $\delta$  7.81 (dd,  $J = 3.7, 1.3$  Hz, 1H), 7.56 (dd,  $J = 5.0, 1.3$  Hz, 1H), 7.12 (dd,  $J = 5.0, 3.7$  Hz, 1H), 4.31 (td,  $J = 6.7, 3.1$  Hz, 2H), 3.82 (dq,  $J = 10.9, 6.1$  Hz, 1H), 1.76 (dq,  $J = 8.1, 6.5, 1.7$  Hz, 2H), 1.60 – 1.37 (m, 3H), 1.15 (d,  $J = 6.1$  Hz, 3H), 0.90 (s, 8H), 0.10 – 0.04 (m, 6H). **<sup>13</sup>C NMR** (151 MHz, CDCl<sub>3</sub>)  $\delta$  162.3, 134.1, 133.2, 132.2, 127.9, 68.4, 65.2, 39.3, 28.8, 25.9, 23.9, 22.2, 18.1, -4.4, -4.7. **HRMS** (ESI) calculated for [C<sub>17</sub>H<sub>30</sub>O<sub>3</sub>SSi+H]<sup>+</sup> 343.1763, found 343.1748.

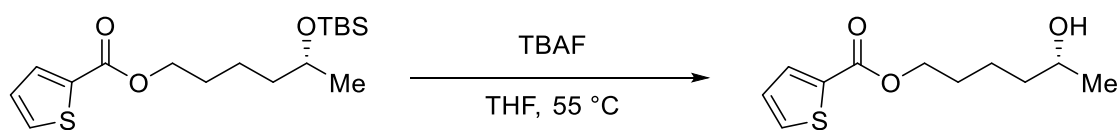

**(R)-5-hydroxyhexyl thiophene-2-carboxylate (SI-20)** was synthesized by subjecting **SI-19** (0.50 g, 1.5 mmol) to General Procedure D. The crude product was purified via flash chromatography in 30% EtOAc/hexanes to provide 0.31 g (93%) of **SI-20** as a colorless oil. **<sup>1</sup>H NMR** (600 MHz, Chloroform-*d*) δ 7.80 (dt, *J* = 3.8, 1.2 Hz, 1H), 7.55 (dt, *J* = 5.1, 1.2 Hz, 1H), 7.10 (ddd, *J* = 5.0, 3.8, 1.3 Hz, 1H), 4.31 (td, *J* = 6.6, 1.5 Hz, 2H), 3.86 – 3.80 (m, 1H), 1.78 (tdt, *J* = 7.6, 5.5, 3.7 Hz, 2H), 1.69 – 1.42 (m, 5H), 1.21 (dd, *J* = 6.2, 1.5 Hz, 3H). **<sup>13</sup>C NMR** (151 MHz, CDCl<sub>3</sub>) δ 162.4, 134.0, 133.3, 132.3, 127.7, 67.9, 65.1, 38.8, 28.7, 23.6, 22.2. **HRMS** (ESI) calculated for [C<sub>11</sub>H<sub>16</sub>O<sub>3</sub>S+H]<sup>+</sup> 229.0898, found 229.0888.

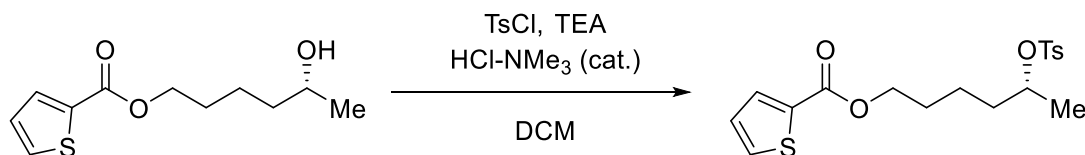

**(R)-5-(tosyloxy)hexyl thiophene-2-carboxylate (SI-21)** was synthesized by tosylating **SI-20** (0.31 g, 1.4 mmol) according to General Procedure A. The crude product was purified via flash chromatography in 20% EtOAc/hexanes to provide 0.38 g (73%) of tosylate **SI-21** as a colorless oil. **<sup>1</sup>H NMR** (600 MHz, Chloroform-*d*) δ 7.83 – 7.76 (m, 3H), 7.57 (dd, *J* = 5.0, 1.3 Hz, 1H), 7.36 – 7.30 (m, 2H), 7.12 (dd, *J* = 5.0, 3.7 Hz, 1H), 4.69 – 4.60 (m, 1H), 4.20 (td, *J* = 6.6, 1.5 Hz, 2H), 2.43 (s, 3H), 1.74 – 1.62 (m, 3H), 1.58 (ddt, *J* = 14.0, 10.5, 5.4 Hz, 1H), 1.47 – 1.37 (m, 1H), 1.36 – 1.25 (m, 4H). **<sup>13</sup>C NMR** (151 MHz, CDCl<sub>3</sub>) δ 162.2, 144.6, 134.5, 133.9, 133.4, 132.3, 129.8, 127.8, 127.7, 80.1, 64.7, 36.1, 28.2, 21.6, 21.5, 20.9. **HRMS** (ESI) calculated for [C<sub>18</sub>H<sub>22</sub>O<sub>5</sub>S<sub>2</sub>+H]<sup>+</sup> 383.0987, found 383.0971. **Chiral HPLC** (Daicel OJ-H, 70:30 hexanes:isopropanol): ee = 96%.

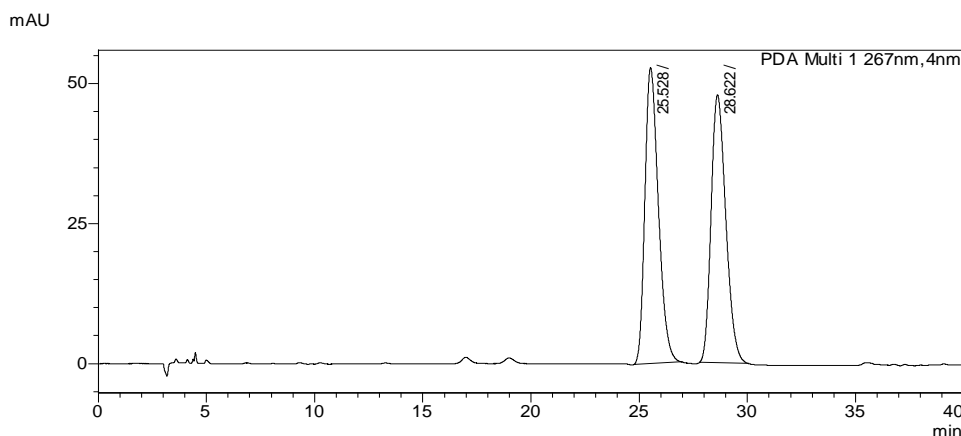

| Peak# | Ret. Time | Area    | Area%  |
|-------|-----------|---------|--------|
| 1     | 25.528    | 2288037 | 50.278 |
| 2     | 28.622    | 2262710 | 49.722 |
| Total |           | 4550748 | 100    |

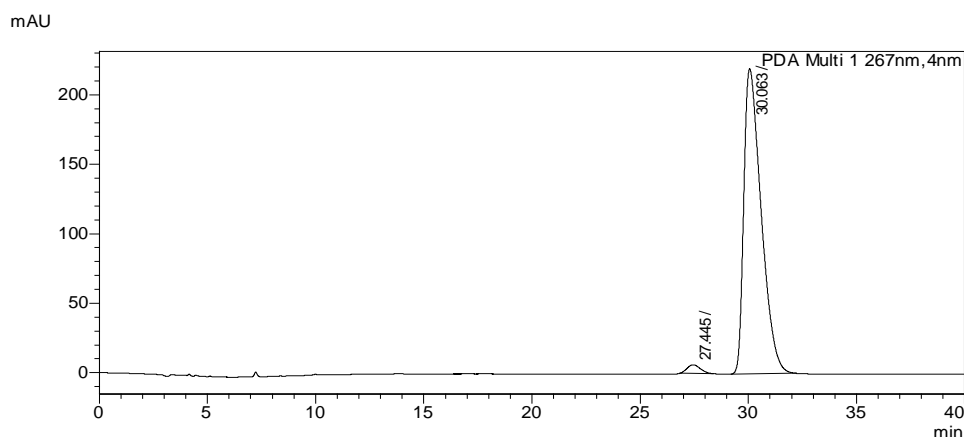

| Peak# | Ret. Time | Area     | Area%  |
|-------|-----------|----------|--------|
| 1     | 27.445    | 265207   | 2.122  |
| 2     | 30.063    | 12234052 | 97.878 |
| Total |           | 12499259 | 100    |

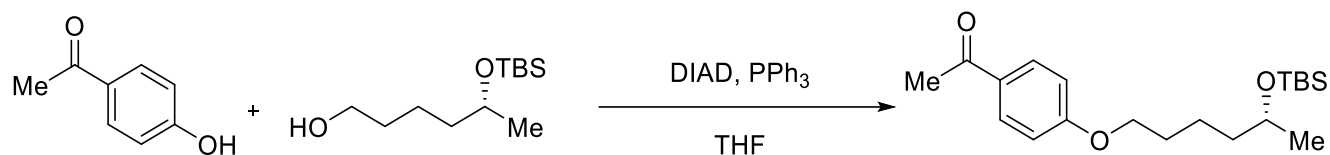

**(R)-1-(4-((5-((*tert*-butyldimethylsilyl)oxy)hexyl)oxy)phenyl)ethan-1-one (SI-22)** was synthesized by subjecting **SI-7** (1.5 g, 6.5 mmol) and 4-hydroxyacetophenone (0.84 g, 6.5 mmol) to General Procedure B. The crude product was purified via flash chromatography in 10% EtOAc/hexanes to provide 1.5 g (70%) of **SI-22** as a yellow oil.  $^1\text{H NMR}$  (600 MHz, Chloroform-*d*)  $\delta$  7.97 – 7.88 (m, 2H), 6.96 – 6.87 (m, 2H), 4.04 (t,  $J$  = 6.5 Hz, 2H), 3.83 (dt,  $J$  = 11.1, 5.6 Hz, 1H), 2.58 (s, 3H), 1.86 – 1.77 (m, 2H), 1.61 – 1.40 (m, 4H), 1.16 (d,  $J$  = 6.0 Hz, 3H), 0.91 (s, 9H), 0.08 – 0.06 (m, 6H).  $^{13}\text{C NMR}$  (151 MHz,  $\text{CDCl}_3$ )  $\delta$  196.9, 163.1, 130.6, 130.1, 114.1, 68.4, 68.1, 39.3, 29.2, 26.4, 25.9, 23.9, 22.2, 18.2, -4.3, -4.7. **HRMS** (ESI) calculated for  $[\text{C}_{20}\text{H}_{34}\text{O}_3\text{Si}+\text{H}]^+$  351.2355, found 351.2361.

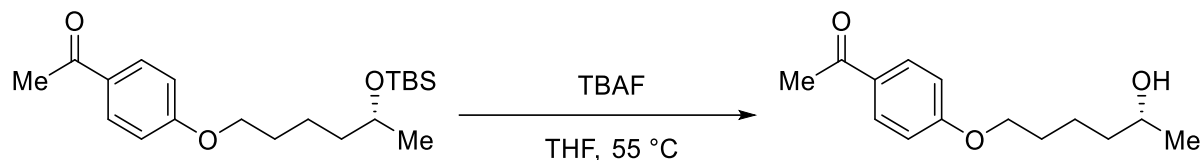

**(R)-1-(4-((5-hydroxyhexyl)oxy)phenyl)ethan-1-one (SI-23)** was synthesized by deprotecting **SI-22** (1.5 g, 4.3 mmol) according to General Procedure D. The crude product was purified via flash chromatography in 40% EtOAc/hexanes to provide 0.80 g (79%) of alcohol **SI-23** as an off-white solid. **<sup>1</sup>H NMR** (600 MHz, Chloroform-*d*)  $\delta$  7.97 – 7.90 (m, 2H), 6.95 – 6.89 (m, 2H), 4.03 (q,  $J$  = 6.4, 5.0 Hz, 2H), 3.89 – 3.80 (m, 1H), 2.56 (s, 3H), 1.83 (dq,  $J$  = 15.5, 6.4 Hz, 2H), 1.75 (br s, 1H), 1.72 – 1.43 (m, 4H), 1.22 (d,  $J$  = 6.1 Hz, 3H). **<sup>13</sup>C NMR** (151 MHz, CDCl<sub>3</sub>)  $\delta$  197.0, 163.0, 130.6, 130.1, 114.1, 68.1, 67.9, 38.9, 29.1, 26.4, 23.6, 22.3. **HRMS** (ESI) calculated for [C<sub>14</sub>H<sub>20</sub>O<sub>3</sub>+H]<sup>+</sup> 237.1491, found 237.1493.

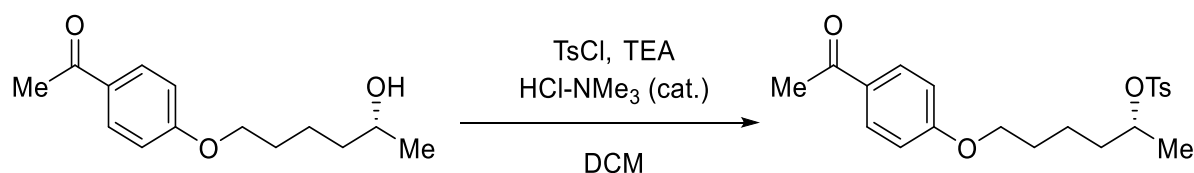

**(R)-6-(4-acetylphenoxy)hexan-2-yl 4-methylbenzenesulfonate (SI-24)** was synthesized by tosylating **SI-23** (0.80 g, 4.2 mmol) according to General Procedure A. The crude product was purified via flash chromatography in 30% EtOAc/hexanes to provide 1.1 g (83%) of tosylate **SI-24** as an ivory white solid. **<sup>1</sup>H NMR** (600 MHz, Chloroform-*d*)  $\delta$  7.97 – 7.92 (m, 2H), 7.83 – 7.78 (m, 2H), 7.35 – 7.30 (m, 2H), 6.93 – 6.87 (m, 2H), 4.70 – 4.62 (m, 1H), 3.94 (t,  $J$  = 6.3 Hz, 2H), 2.57 (s, 3H), 2.41 (s, 3H), 1.77 – 1.67 (m, 3H), 1.64 – 1.55 (m, 1H), 1.53 – 1.45 (m, 1H), 1.44 – 1.34 (m, 1H), 1.27 (d,  $J$  = 6.3 Hz, 3H). **<sup>13</sup>C NMR** (151 MHz, CDCl<sub>3</sub>)  $\delta$  196.9, 162.9, 144.6, 134.4, 130.6, 130.2, 129.8, 127.7, 114.1, 80.2, 67.8, 36.2, 28.6, 26.4, 21.6, 21.5, 20.8. **HRMS** (ESI) calculated for [C<sub>21</sub>H<sub>26</sub>O<sub>5</sub>S+H]<sup>+</sup> 391.1579, found 391.1583. **Chiral HPLC** (Daicel OJ-H, 70:30 hexanes:isopropanol): ee = 95%.

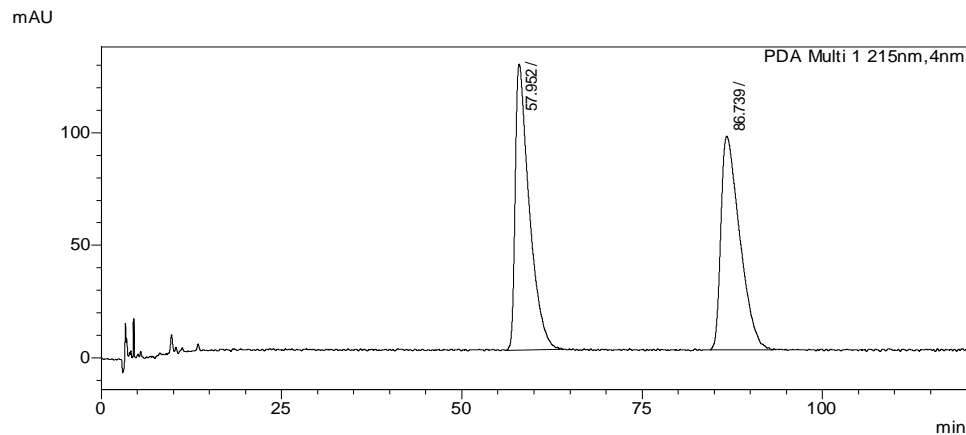

| Peak# | Ret. Time | Area     | Area%  |
|-------|-----------|----------|--------|
| 1     | 57.952    | 17196346 | 49.976 |
| 2     | 86.739    | 17212767 | 50.024 |
| Total |           | 34409113 | 100    |

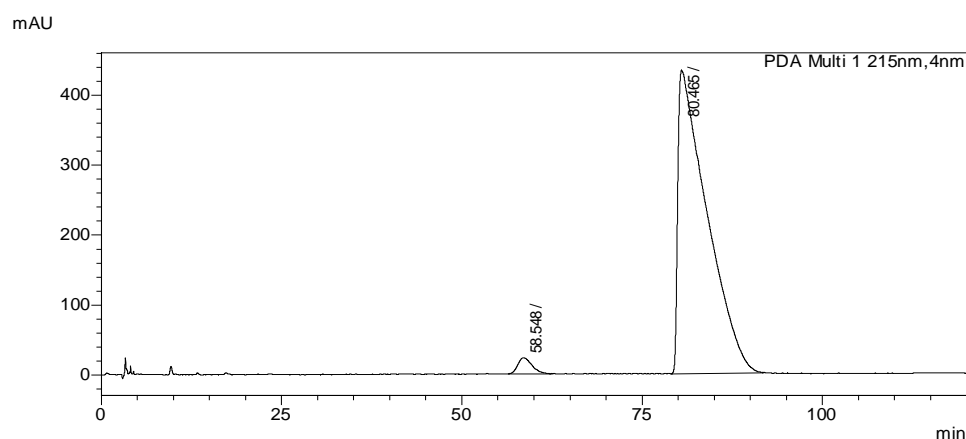

| Peak# | Ret. Time | Area      | Area%  |
|-------|-----------|-----------|--------|
| 1     | 58.547    | 3328932   | 2.538  |
| 2     | 80.466    | 127820507 | 97.462 |
| Total |           | 131149439 | 100    |

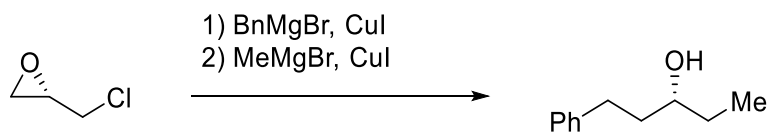

**(R)-1-phenylpentan-3-ol (SI-25)** was synthesized using the 2-step sequence shown above. To a  $-78\text{ }^{\circ}\text{C}$  suspension of CuI (4.6 g, 24 mmol) in THF (15 mL) was added benzylmagnesium bromide (12 mL, 2.0 M in THF, 24 mmol) and stirred for 5 minutes. (S)-epichlorohydrin (1.3 mL g, 16 mmol) was added and the reaction was warmed to  $0\text{ }^{\circ}\text{C}$

for 3 hours with stirring. The reaction was then stirred overnight at room temperature. The mixture was quenched with an aqueous saturated solution of  $\text{NH}_4\text{Cl}$  and extracted 3 times with  $\text{Et}_2\text{O}$ . The combined organic layers were dried over  $\text{MgSO}_4$ , filtered, and concentrated under reduced pressure. The crude product was purified via flash chromatography in 10%  $\text{EtOAc}$ /hexanes to provide 1.3 g (54%) of the enantioenriched oxirane intermediate as a colorless oil. Physical and spectral data were in accordance with literature data.<sup>[10]</sup> To a  $-78\text{ }^\circ\text{C}$  suspension of  $\text{CuI}$  (2.3 g, 12 mmol) in THF (8 mL) was added methylmagnesium bromide (3 mL, 3.0 M in  $\text{Et}_2\text{O}$ , 8 mmol) and stirred for 5 minutes. A solution of the oxirane intermediate (1.2 g, 8 mmol) in THF (5 mL) was then added and the reaction was warmed to  $0\text{ }^\circ\text{C}$  for 3 hours with stirring. The mixture was quenched with an aqueous saturated solution of  $\text{NH}_4\text{Cl}$  and extracted 3 times with  $\text{Et}_2\text{O}$ . The combined organic layers were dried over  $\text{MgSO}_4$ , filtered, and concentrated under reduced pressure. The crude product was purified via flash chromatography in 10%  $\text{EtOAc}$ /hexanes to provide 0.92 g (69%) of alcohol **SI-25** as a colorless oil. Physical and spectral data were in accordance with literature data.<sup>[11]</sup>

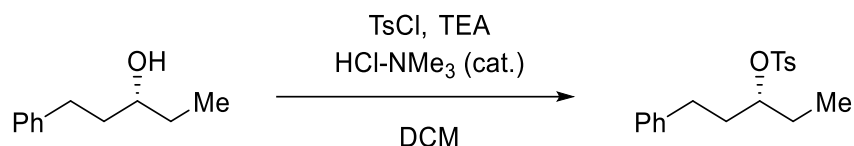

**(R)-1-phenylpentan-3-yl 4-methylbenzenesulfonate (SI-26)** was synthesized by tosylating **SI-25** (0.80 g, 4.9 mmol) according to General Procedure A. The crude product was purified via flash chromatography in 10%  $\text{EtOAc}$ /hexanes to provide 1.1 g (71%) of tosylate **SI-26** as a colorless oil.  **$^1\text{H NMR}$**  (600 MHz,  $\text{CDCl}_3$ )  $\delta$  7.86 – 7.81 (m, 2H), 7.36 (d,  $J = 8.0$  Hz, 2H), 7.29 (t,  $J = 7.6$  Hz, 2H), 7.25 – 7.19 (m, 1H), 7.13 – 7.08 (m, 2H), 4.63 – 4.56 (m, 1H), 2.63 (ddd,  $J = 13.8, 10.3, 6.1$  Hz, 1H), 2.55 (ddd,  $J = 13.9, 10.2, 5.9$  Hz, 1H), 2.48 (s, 3H), 1.99 – 1.85 (m, 2H), 1.77 – 1.64 (m, 2H), 0.88 (t,  $J = 7.4$  Hz, 3H).  **$^{13}\text{C NMR}$**  (151 MHz,  $\text{CDCl}_3$ )  $\delta$  144.6, 141.1, 134.6, 129.8, 128.5, 128.3, 127.8, 126.1, 84.8, 35.3, 31.1, 27.1, 21.7, 9.1. **HRMS** (ESI) calculated for  $[\text{C}_{18}\text{H}_{22}\text{O}_3\text{S} + \text{Na}]^+$  341.1187, found 341.1155. **Chiral SFC** (Cellulose-2, 99:1 hexanes:isopropanol): ee = >99%.

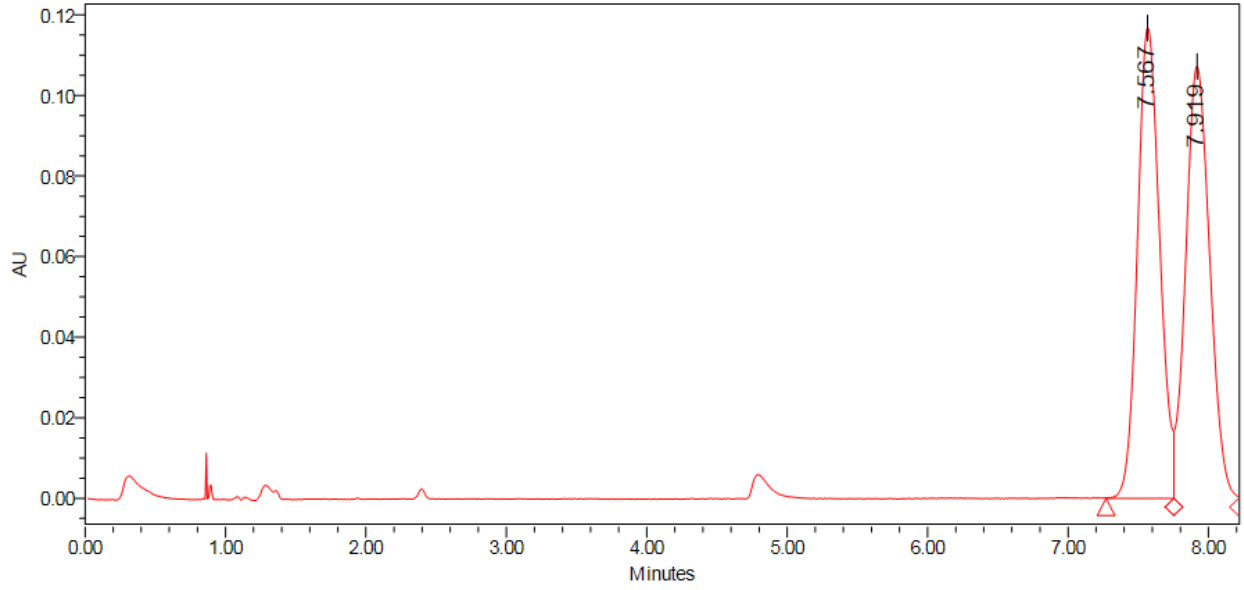

| Peak# | Ret. Time | Area% |
|-------|-----------|-------|
| 1     | 7.567     | 52.13 |
| 2     | 7.919     | 47.87 |
| Total |           | 100   |

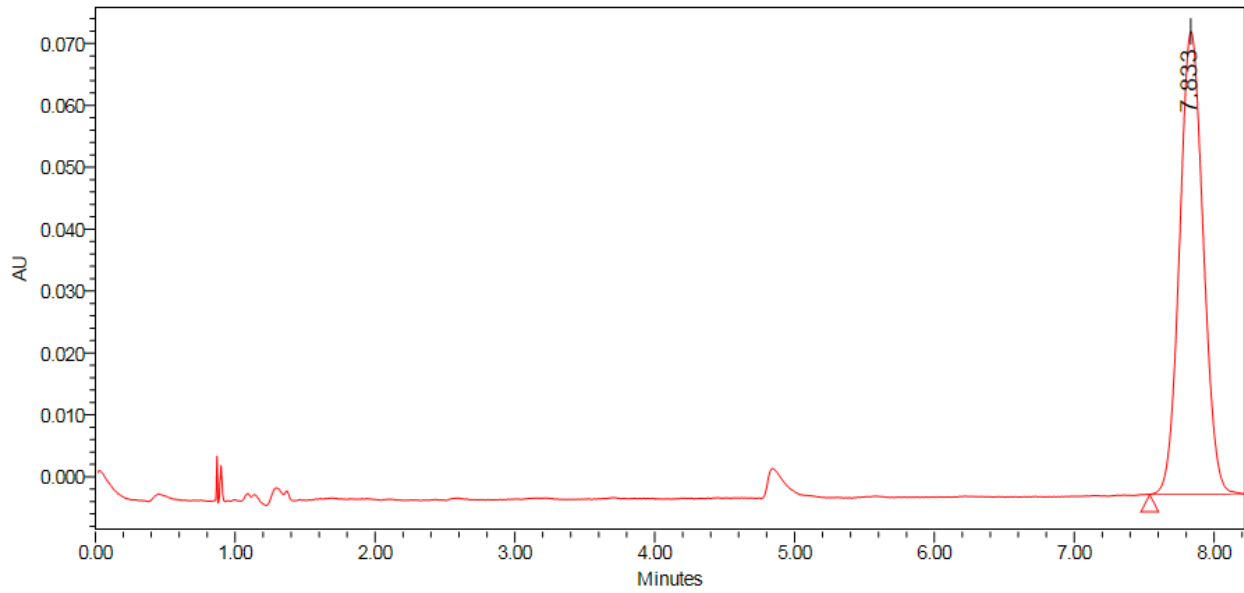

| Peak# | Ret. Time | Area% |
|-------|-----------|-------|
| 1     | 7.833     | 100   |
| Total |           | 100   |



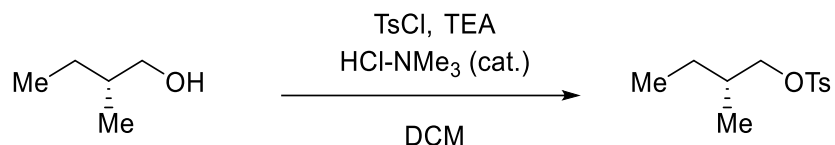

**(S)-2-methylbutyl 4-methylbenzenesulfonate (SI-27)** was synthesized by tosylating (S)-2-methylbutan-1-ol (5.0 mL, 55 mmol) according to General Procedure A. The crude product was purified via flash chromatography in 5% EtOAc/hexanes to provide 9.8 g (74%) of tosylate **SI-27** as a colorless liquid. Physical and spectral data were in accordance with literature data.<sup>[12]</sup> **Chiral HPLC** (Daicel OJ-H, 99.5:0.5 hexanes:isopropanol): ee = >99%.

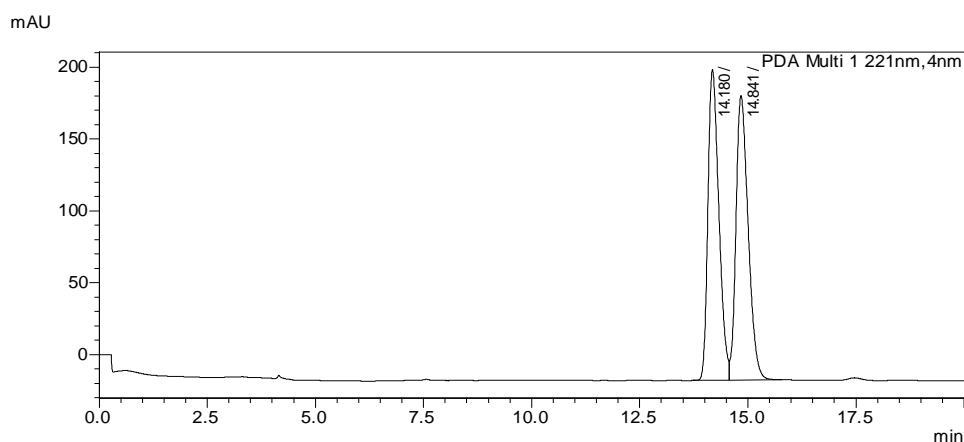

| Peak# | Ret. Time | Area    | Area%  |
|-------|-----------|---------|--------|
| 1     | 14.18     | 3808916 | 49.505 |
| 2     | 14.841    | 3885086 | 50.495 |
| Total |           | 7694002 | 100    |

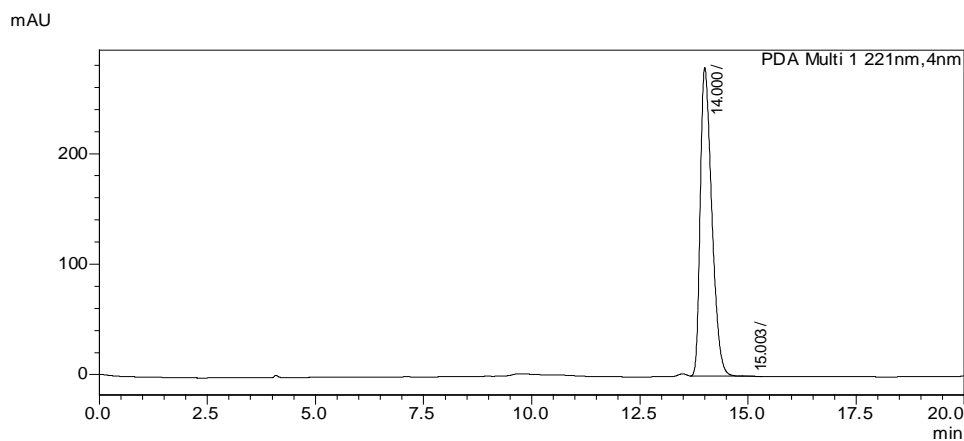

| Peak# | Ret. Time | Area | Area% |
|-------|-----------|------|-------|
|       | 14.000    |      |       |
|       | 15.003    |      |       |

|       |        |         |        |
|-------|--------|---------|--------|
| 1     | 14     | 5164457 | 99.869 |
| 2     | 15.003 | 6767    | 0.131  |
| Total |        | 5171224 | 100    |

## Cobalt-Catalyzed Reactions

**General Carbonylation Procedure A:** In a glovebox under an argon atmosphere, alkyl tosylate (0.25 mmol) was combined with  $\text{Co}_2(\text{CO})_8$  (8.5 mg, 0.025 mmol), TMP (84  $\mu\text{L}$ , 0.50 mmol), amine (.325 mmol), and *t*-amyl alcohol (1 mL) in a Parr reactor. The vessel was sealed with a regulator and removed from the glovebox. Subsequently, the reactor was pressurized with 40 atm CO and stirred for 48 hours (unless otherwise noted) at 70  $^\circ\text{C}$ . The reaction mixture was cooled to room temperature, depressurized, and 3 mL HCl (1 M) was added. The mixture was extracted three times with EtOAc and the combined organic layers were allowed to sit open to air for two hours to decompose the cobalt complex. The combined organic layers were filtered through a plug of  $\text{SiO}_2$ , eluting with EtOAc, and concentrated under reduced pressure. The crude product was purified by flash chromatography.

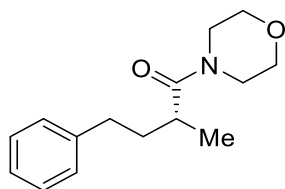

**(*R*)-2-methyl-1-morpholino-4-phenylbutan-1-one (3)** was obtained from General Carbonylation Procedure A and the crude product (85% NMR yield) was purified via flash chromatography using a gradient of 30-75% EtOAc/hexanes yielding **3** as a colorless oil (45 mg, 73%).  $^1\text{H NMR}$  (600 MHz, Chloroform-*d*)  $\delta$  7.29 (t,  $J = 7.6$  Hz, 2H), 7.22 – 7.15 (m, 3H), 3.78 – 3.60 (m, 3H), 3.59 (t,  $J = 5.0$  Hz, 2H), 3.36 – 3.28 (m, 2H), 2.76 – 2.53 (m, 3H), 2.07 (dtd,  $J = 13.8, 8.1, 6.6$  Hz, 1H), 1.71 (ddt,  $J = 13.3, 8.5, 6.6$  Hz, 1H), 1.15 (d,  $J = 7.0$  Hz, 3H).  $^{13}\text{C NMR}$  (151 MHz,  $\text{CDCl}_3$ )  $\delta$  174.8, 141.7, 128.5, 128.4, 126.0, 67.1, 66.8, 45.8, 42.1, 35.4, 34.0, 33.4, 17.5. **HRMS** (ESI) calculated for  $[\text{C}_{15}\text{H}_{21}\text{NO}_2+\text{H}]^+$  248.1651, found 248.1637. **Chiral HPLC** (Daicel OJ-H, 90:10 hexanes:isopropanol): ee = 96%, es = 97%.

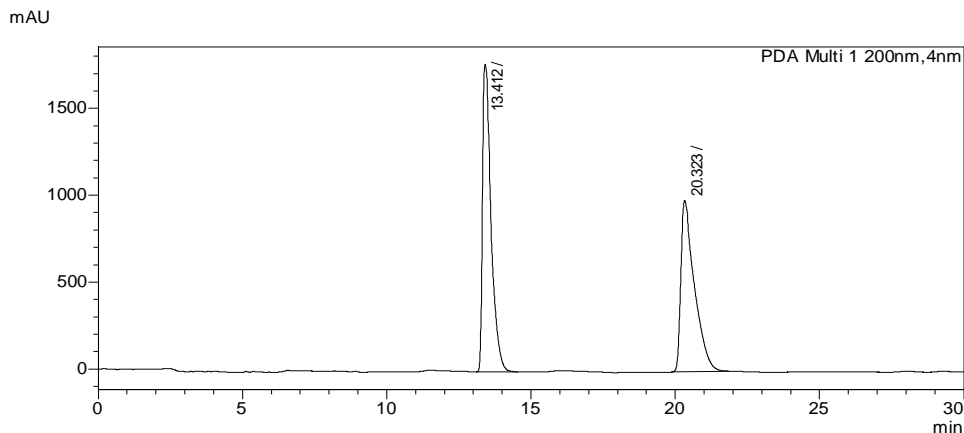

| Peak# | Ret. Time | Area     | Area%  |
|-------|-----------|----------|--------|
| 1     | 13.412    | 36422131 | 53.109 |
| 2     | 20.323    | 32158108 | 46.891 |
| Total |           | 68580239 | 100    |

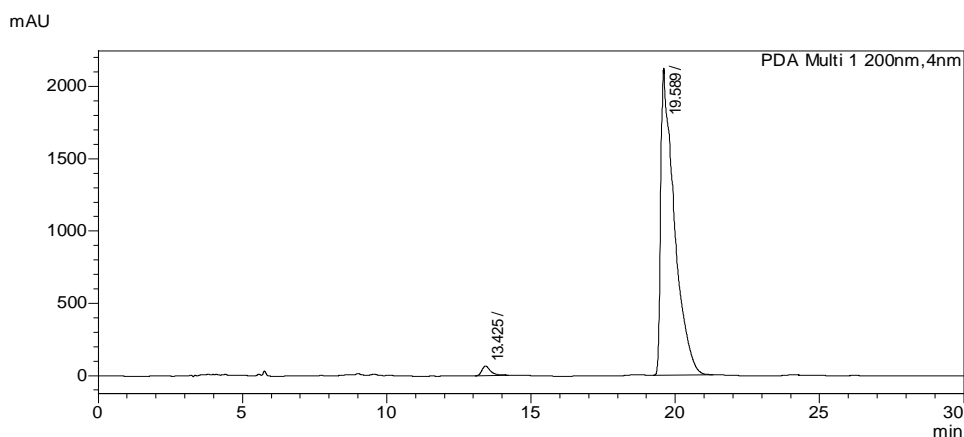

| Peak# | Ret. Time | Area     | Area%  |
|-------|-----------|----------|--------|
| 1     | 13.425    | 1377020  | 1.955  |
| 2     | 19.589    | 69045255 | 98.045 |
| Total |           | 70422275 | 100    |

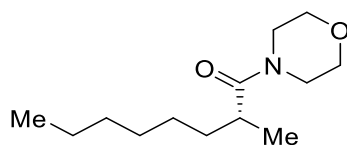

**(R)-2-methyl-1-morpholinooctan-1-one (4)** was obtained from General Carbonylation Procedure A (24 h) and the crude product was purified via flash chromatography using a gradient of 10-75% EtOAc/hexanes yielding **4** as a colorless oil (29 mg, 51%). <sup>1</sup>H NMR (600 MHz, Chloroform-*d*) δ 3.67 (t, *J* = 5.1 Hz, 4H), 3.67 – 3.62 (m, 2H), 3.52 (q, *J* = 3.9

Hz, 2H), 2.65 (h,  $J = 6.8$  Hz, 1H), 1.67 (dt,  $J = 13.5, 6.8$  Hz, 1H), 1.39 (dt,  $J = 14.2, 7.0$  Hz, 1H), 1.34 – 1.24 (m, 8H), 1.11 (d,  $J = 6.8$  Hz, 3H), 0.88 (t,  $J = 6.9$  Hz, 3H).  $^{13}\text{C}$  NMR (151 MHz,  $\text{CDCl}_3$ )  $\delta$  175.3, 67.1, 66.9, 46.1, 42.1, 35.1, 34.1, 31.8, 29.4, 27.4, 22.6, 17.5, 14.1. **HRMS** (ESI) calculated for  $[\text{C}_{13}\text{H}_{25}\text{NO}_2+\text{H}]^+$  228.1964, found 228.1951. **Chiral HPLC** (Chiralpak IG, 95:5 hexanes:isopropanol): ee = 99%, es = 99%.

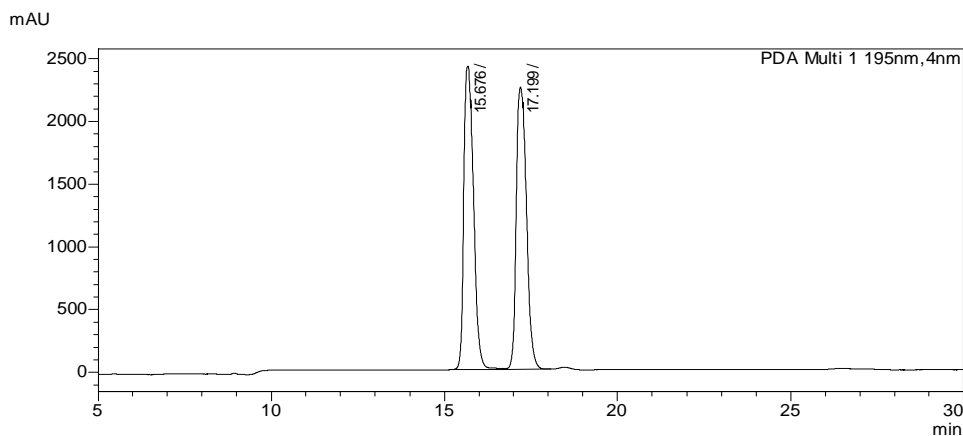

| Peak# | Ret. Time | Area     | Area%  |
|-------|-----------|----------|--------|
| 1     | 15.676    | 47291170 | 50.641 |
| 2     | 17.199    | 46094846 | 49.359 |
| Total |           | 93386017 | 100    |

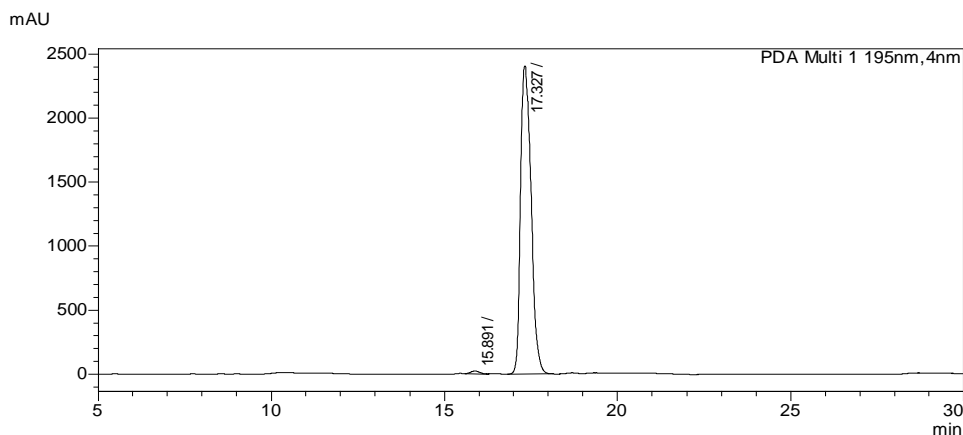

| Peak# | Ret. Time | Area     | Area%  |
|-------|-----------|----------|--------|
| 1     | 15.891    | 368388   | 0.717  |
| 2     | 17.327    | 51041381 | 99.283 |
| Total |           | 51409769 | 100    |

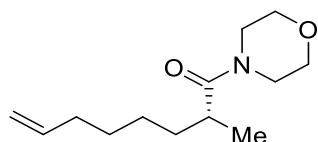

**(R)-2-methyl-1-morpholinooct-7-en-1-one (5)** was obtained from General Carbonylation Procedure A and the crude product was purified via flash chromatography using a gradient of 10-75% EtOAc/hexanes yielding **5** as a colorless oil (30.2 mg, 54%). **<sup>1</sup>H NMR** (600 MHz, Chloroform-*d*)  $\delta$  5.80 (ddt,  $J = 13.4, 10.1, 6.7$  Hz, 1H), 5.00 (dt,  $J = 17.1, 1.7$  Hz, 1H), 4.94 (dq,  $J = 10.2, 1.5$  Hz, 1H), 3.70 – 3.63 (m, 6H), 3.52 (q,  $J = 3.9$  Hz, 2H), 2.65 (h,  $J = 6.8$  Hz, 1H), 2.05 (qt,  $J = 7.3, 1.5$  Hz, 2H), 1.74 – 1.65 (m, 1H), 1.46 – 1.34 (m, 3H), 1.36 – 1.24 (m, 2H), 1.12 (dd,  $J = 6.9, 1.3$  Hz, 3H). **<sup>13</sup>C NMR** (151 MHz, CDCl<sub>3</sub>)  $\delta$  175.2, 138.8, 114.4, 67.1, 66.9, 46.1, 42.1, 35.1, 33.9, 33.6, 29.0, 26.9, 17.6. **HRMS** (ESI) calculated for [C<sub>13</sub>H<sub>23</sub>NO<sub>2</sub>+H]<sup>+</sup> 226.1807, found 226.1794. **Chiral HPLC** (Chiralpak IG, 95:5 hexanes:isopropanol): ee = 97%, es = >99%.

mAU

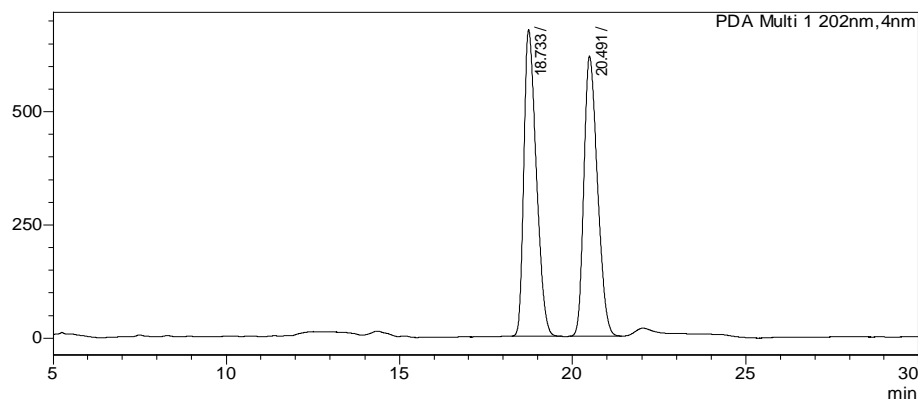

| Peak# | Ret. Time | Area     | Area%  |
|-------|-----------|----------|--------|
| 1     | 18.733    | 16898844 | 50.047 |
| 2     | 20.491    | 16866822 | 49.953 |
| Total |           | 33765666 | 100    |

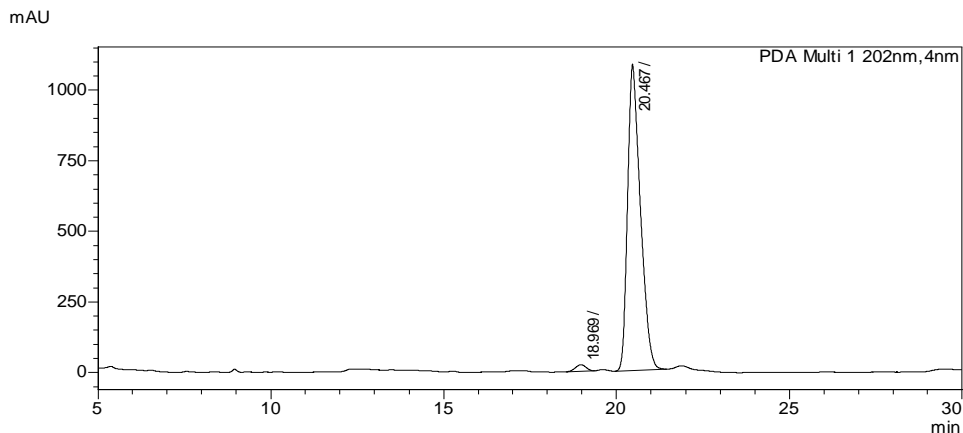

| Peak# | Ret. Time | Area     | Area%  |
|-------|-----------|----------|--------|
| 1     | 18.969    | 495532   | 1.748  |
| 2     | 20.467    | 27848703 | 98.252 |
| Total |           | 28344235 | 100    |

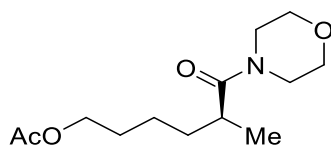

**(S)-5-methyl-6-morpholino-6-oxohexyl acetate (6)** was obtained from General Carbonylation Procedure A and the crude product was purified via flash chromatography using a gradient of 20-75% EtOAc/hexanes yielding **6** as a colorless oil (45 mg, 70%). **<sup>1</sup>H NMR** (600 MHz, Chloroform-*d*)  $\delta$  4.05 (t,  $J$  = 6.7 Hz, 2H), 3.73 – 3.60 (m, 6H), 3.53 (dd,  $J$  = 6.1, 3.7 Hz, 2H), 2.66 (h,  $J$  = 6.8 Hz, 1H), 2.05 (d,  $J$  = 1.0 Hz, 3H), 1.78 – 1.66 (m, 1H), 1.63 (ddt,  $J$  = 15.2, 8.4, 6.2 Hz, 2H), 1.46 – 1.36 (m, 1H), 1.33 (p,  $J$  = 7.7 Hz, 2H), 1.12 (dd,  $J$  = 6.8, 1.0 Hz, 3H). **<sup>13</sup>C NMR** (151 MHz, CDCl<sub>3</sub>)  $\delta$  174.9, 171.2, 67.1, 66.9, 64.3, 46.1, 42.1, 35.1, 33.6, 28.7, 23.9, 21.0, 17.6. **HRMS** (ESI) calculated for [C<sub>13</sub>H<sub>23</sub>NO<sub>4</sub>+H]<sup>+</sup> 258.1705, found 258.1691. **Chiral HPLC** (Chiralpak IE, 80:20 hexanes:isopropanol): ee = 93%, es = >99%.

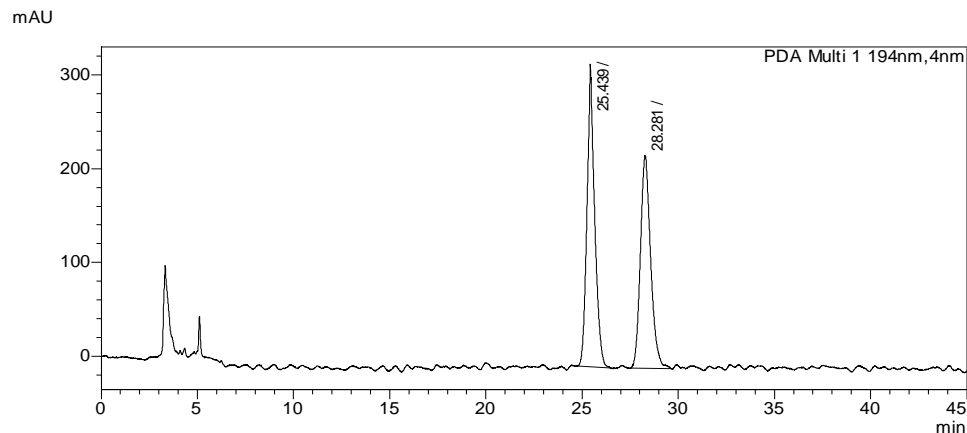

| Peak# | Ret. Time | Area     | Area%  |
|-------|-----------|----------|--------|
| 1     | 25.439    | 8842230  | 51.196 |
| 2     | 28.281    | 8429232  | 48.804 |
| Total |           | 17271461 | 100    |

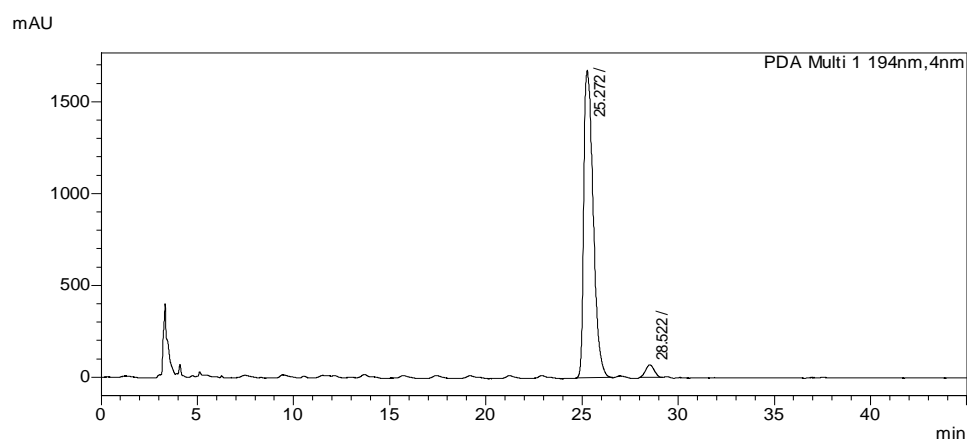

| Peak# | Ret. Time | Area     | Area%  |
|-------|-----------|----------|--------|
| 1     | 25.272    | 56932706 | 96.442 |
| 2     | 28.522    | 2100495  | 3.558  |
| Total |           | 59033201 | 100    |

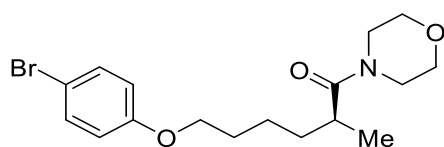

**(S)-6-(4-bromophenoxy)-2-methyl-1-morpholinohexan-1-one (7)** was obtained from General Carbonylation Procedure A and the crude product was purified via flash chromatography using a gradient of 20-75% EtOAc/hexanes yielding **7** as a cream colored solid (52 mg, 56%). <sup>1</sup>H NMR (600 MHz, Chloroform-*d*) δ 7.40 – 7.34 (m, 2H), 6.80



– 6.74 (m, 2H), 3.97 – 3.86 (m, 2H), 3.74 – 3.60 (m, 6H), 3.53 (t,  $J = 4.9$  Hz, 2H), 2.73 – 2.64 (m, 1H), 1.84 – 1.72 (m, 3H), 1.51 – 1.40 (m, 3H), 1.14 (d,  $J = 6.8$  Hz, 3H).  $^{13}\text{C}$  NMR (151 MHz,  $\text{CDCl}_3$ )  $\delta$  175.0, 158.1, 132.2, 116.3, 112.7, 67.9, 67.1, 66.9, 46.1, 42.1, 35.2, 33.7, 29.3, 24.0, 17.7. **HRMS** (ESI) calculated for  $[\text{C}_{17}\text{H}_{24}\text{BrNO}_3+\text{H}]^+$  370.1018, found 370.1024. **Chiral HPLC** (Daicel OJ-H, 95:5 hexanes:isopropanol): ee = 90%, es = 93%.

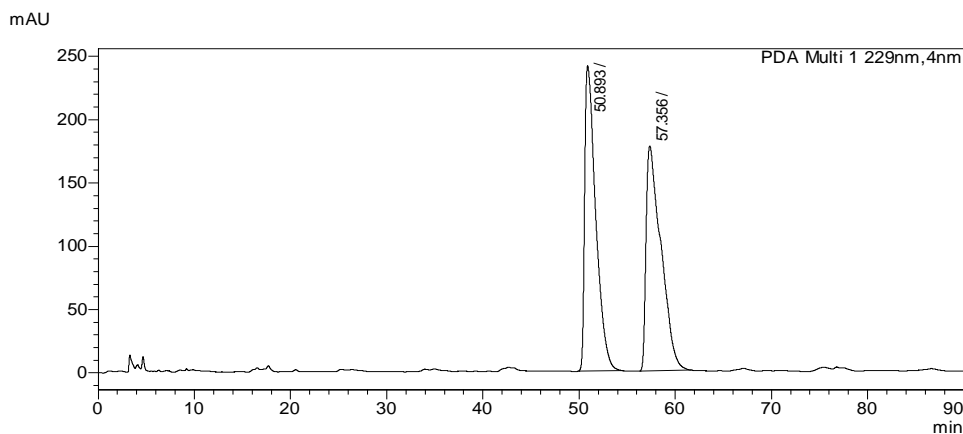

| Peak# | Ret. Time | Area     | Area%  |
|-------|-----------|----------|--------|
| 1     | 50.893    | 19283341 | 50.175 |
| 2     | 57.356    | 19148686 | 49.825 |
| Total |           | 38432028 | 100    |

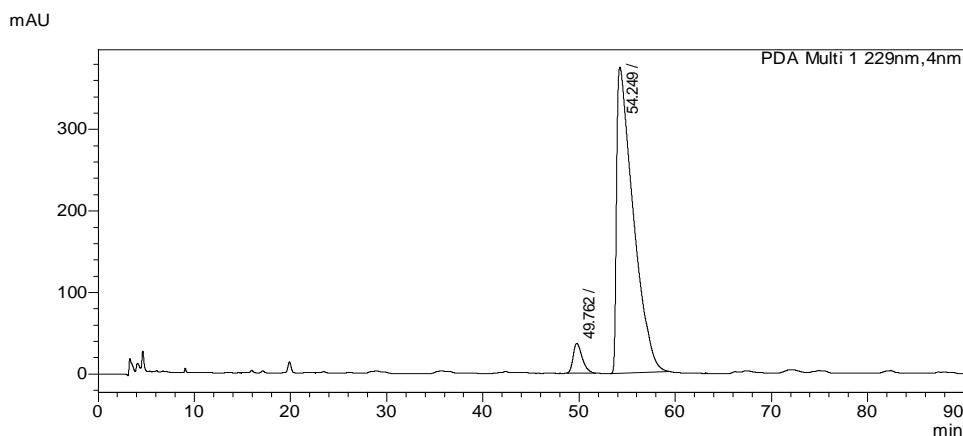

| Peak# | Ret. Time | Area     | Area%  |
|-------|-----------|----------|--------|
| 1     | 49.762    | 2363057  | 4.971  |
| 2     | 54.249    | 45177434 | 95.029 |
| Total |           | 47540491 | 100    |

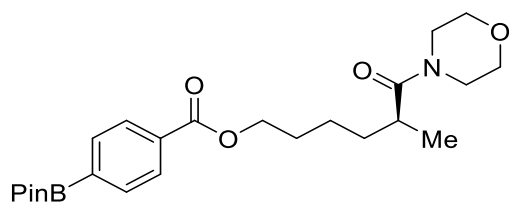

**(S)-5-methyl-6-morpholino-6-oxohexyl 4-(4,4,5,5-tetramethyl-1,3,2-dioxaborolan-2-yl)benzoate (8)** was obtained from General Carbonylation Procedure A and the crude product (71% NMR yield) was purified via flash chromatography using a gradient of 20-75% EtOAc/hexanes yielding **8** as a viscous, pale yellow oil (50 mg, 48%). <sup>1</sup>H NMR (600 MHz, Chloroform-*d*) δ 8.04 – 7.99 (m, 2H), 7.89 – 7.85 (m, 2H), 4.32 (td, *J* = 6.6, 1.1 Hz, 2H), 3.69 – 3.59 (m, 6H), 3.52 (td, *J* = 4.5, 2.4 Hz, 2H), 2.72 – 2.63 (m, 1H), 1.84 – 1.71 (m, 3H), 1.52 – 1.37 (m, 3H), 1.36 (s, 12H), 1.13 (d, *J* = 6.8 Hz, 3H). <sup>13</sup>C NMR (151 MHz, CDCl<sub>3</sub>) δ 175.0, 166.7, 134.7, 132.5, 128.6, 84.2, 67.1, 66.9, 64.9, 46.0, 42.1, 35.1, 33.6, 28.8, 24.89, 24.85, 24.0, 17.7. HRMS (ESI) calculated for [C<sub>24</sub>H<sub>36</sub>BNO<sub>6</sub>+H]<sup>+</sup> 446.2714, found 446.2721. Chiral HPLC (Chiralpak IF, 80:20 hexanes:isopropanol): ee = 86%, es = 93%.

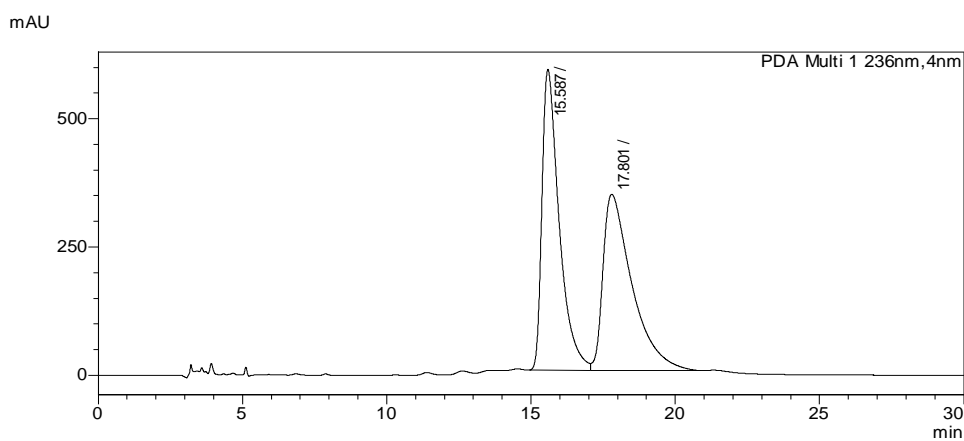

| Peak# | Ret. Time | Area     | Area%  |
|-------|-----------|----------|--------|
| 1     | 15.587    | 24342286 | 50.362 |
| 2     | 17.801    | 23992087 | 49.638 |
| Total |           | 48334373 | 100    |

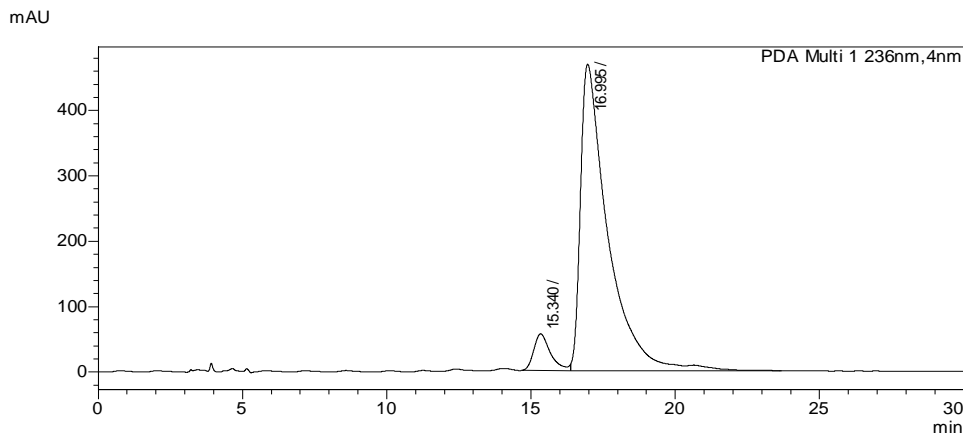

| Peak# | Ret. Time | Area     | Area%  |
|-------|-----------|----------|--------|
| 1     | 15.34     | 2267568  | 6.825  |
| 2     | 16.995    | 30955789 | 93.175 |
| Total |           | 33223357 | 100    |

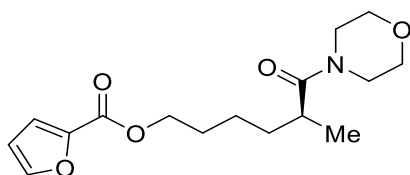

**(S)-5-methyl-6-morpholino-6-oxohexyl furan-2-carboxylate (9)** was obtained from General Carbonylation Procedure A and the crude product was purified via flash chromatography using a gradient of 40-100% EtOAc/hexanes yielding **9** as a yellow oil (40 mg, 52%). **<sup>1</sup>H NMR** (600 MHz, Chloroform-*d*)  $\delta$  7.59 (dd,  $J = 1.8, 0.9$  Hz, 1H), 7.18 (dd,  $J = 3.5, 1.0$  Hz, 1H), 6.52 (dd,  $J = 3.5, 1.7$  Hz, 1H), 4.31 (td,  $J = 6.7, 1.3$  Hz, 2H), 3.74 – 3.58 (m, 6H), 3.53 (q,  $J = 4.1$  Hz, 2H), 2.68 (h,  $J = 6.8$  Hz, 1H), 1.82 – 1.69 (m, 3H), 1.52 – 1.35 (m, 3H), 1.13 (d,  $J = 6.8$  Hz, 3H). **<sup>13</sup>C NMR** (151 MHz, CDCl<sub>3</sub>)  $\delta$  174.9, 158.8, 146.2, 144.8, 117.8, 111.8, 67.1, 66.9, 64.8, 46.1, 42.1, 35.1, 33.5, 28.8, 23.9, 17.7. **HRMS** (ESI) calculated for [C<sub>16</sub>H<sub>23</sub>NO<sub>5</sub>+H]<sup>+</sup> 310.1654, found 310.1640 **Chiral SFC** (Phenomenex Lux Cellulose-1, 95:5 CO<sub>2</sub>:isopropanol): ee = 92%, es = 94%.

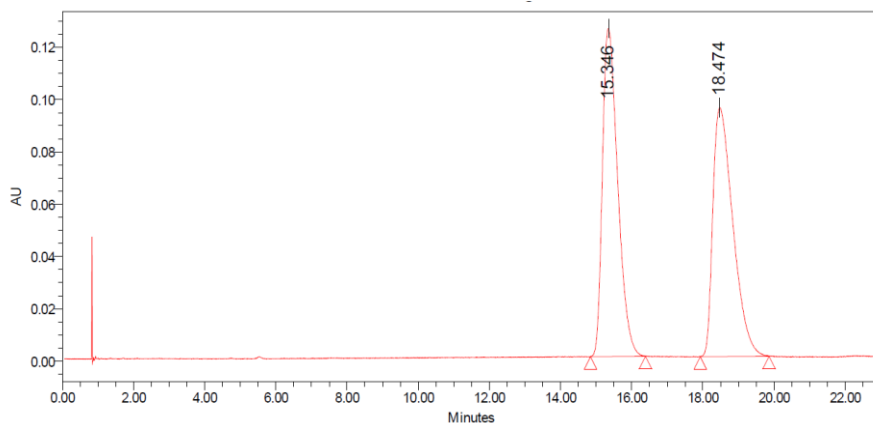

| Peak# | Ret. Time | Area% |
|-------|-----------|-------|
| 1     | 15.346    | 50.12 |
| 2     | 18.474    | 49.88 |
| Total |           | 100   |

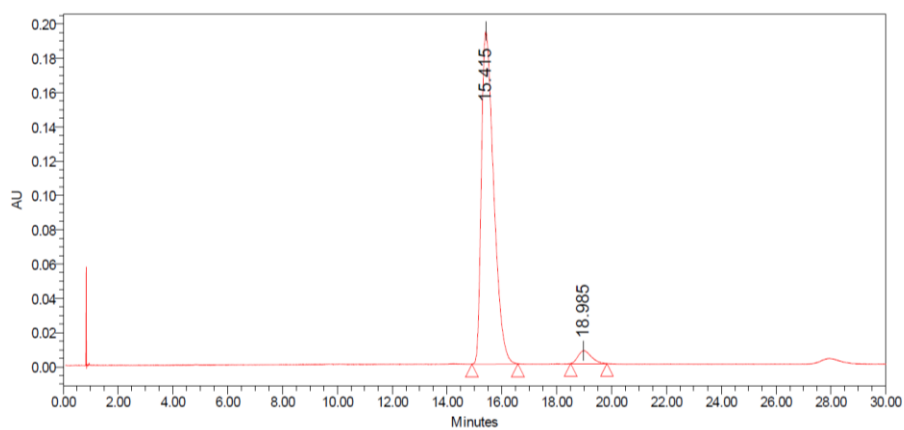

| Peak# | Ret. Time | Area% |
|-------|-----------|-------|
| 1     | 15.415    | 95.96 |
| 2     | 18.985    | 4.04  |
| Total |           | 100   |

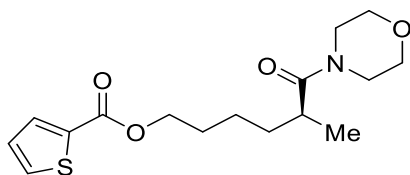

**(S)-5-methyl-6-morpholino-6-oxohexyl thiophene-2-carboxylate (10)** was obtained from General Carbonylation Procedure A and the crude product was purified via flash chromatography using a gradient of 50-100% EtOAc/hexanes yielding **10** as a pale yellow oil (48.4 mg, 60%). <sup>1</sup>H NMR (600 MHz, Chloroform-*d*) δ 7.80 (dd, *J* = 3.8, 1.3 Hz, 1H),

7.56 (dd,  $J = 5.0, 1.3$  Hz, 1H), 7.11 (dd,  $J = 5.0, 3.7$  Hz, 1H), 4.30 (td,  $J = 6.6, 2.5$  Hz, 2H), 3.75 – 3.59 (m, 6H), 3.53 (q,  $J = 4.0$  Hz, 2H), 2.68 (h,  $J = 6.8$  Hz, 1H), 1.82 – 1.69 (m, 3H), 1.51 – 1.36 (m, 3H), 1.13 (d,  $J = 6.8$  Hz, 3H).  $^{13}\text{C}$  NMR (151 MHz,  $\text{CDCl}_3$ )  $\delta$  174.9, 162.3, 133.9, 133.3, 132.3, 127.8, 67.1, 66.9, 64.9, 46.1, 42.1, 35.1, 33.6, 28.8, 23.9, 17.6. **HRMS** (ESI) calculated for  $[\text{C}_{16}\text{H}_{23}\text{NO}_4\text{S}+\text{H}]^+$  326.1426, found 326.1412. **Chiral SFC** (Phenomenex Lux Cellulose-1, 95:5  $\text{CO}_2$ :isopropanol): ee = 91%, es = 95%.

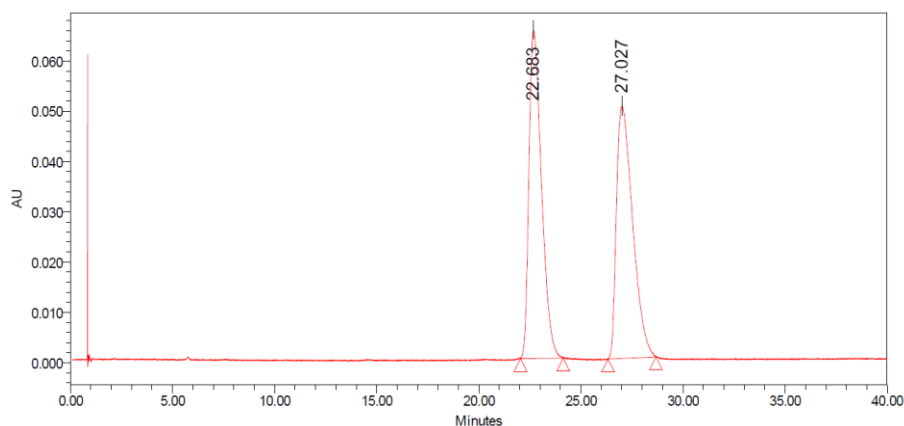

| Peak# | Ret. Time | Area% |
|-------|-----------|-------|
| 1     | 22.683    | 50.19 |
| 2     | 27.027    | 49.81 |
| Total |           | 100   |

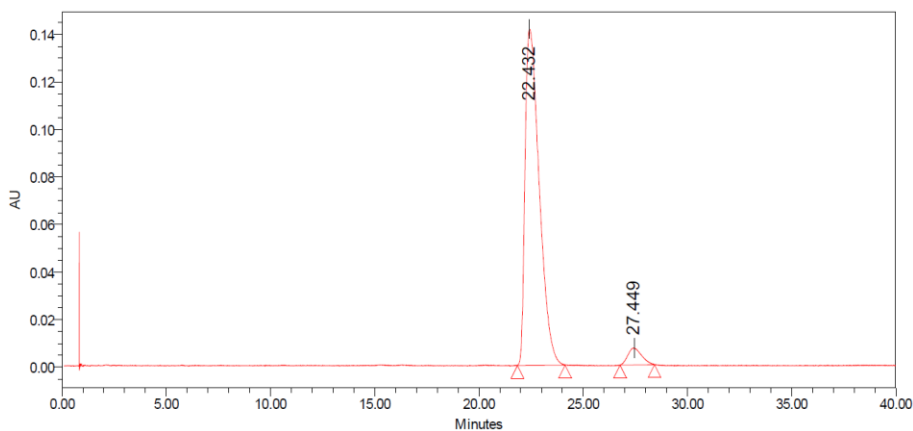

| Peak# | Ret. Time | Area% |
|-------|-----------|-------|
| 1     | 22.432    | 95.32 |
| 2     | 27.449    | 4.68  |
| Total |           | 100   |

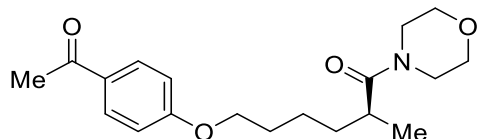

**(S)-6-(4-acetylphenoxy)-2-methyl-1-morpholinohexan-1-one (11)** was obtained from General Carbonylation Procedure A and the crude product was purified via flash chromatography using a gradient of 40-75% EtOAc/hexanes yielding **11** as a colorless oil (52 mg, 62%). <sup>1</sup>H NMR (600 MHz, Chloroform-*d*) δ 7.95 – 7.90 (m, 2H), 6.94 – 6.88 (m, 2H), 4.06 – 3.97 (m, 2H), 3.70 – 3.65 (m, 5H), 3.65 – 3.58 (m, 1H), 3.53 (t, *J* = 4.8 Hz, 2H), 2.73 – 2.65 (m, 1H), 2.56 (s, 3H), 1.81 (dddd, *J* = 18.3, 13.5, 9.2, 7.6 Hz, 3H), 1.52 – 1.42 (m, 3H), 1.14 (d, *J* = 6.8 Hz, 3H). <sup>13</sup>C NMR (151 MHz, CDCl<sub>3</sub>) δ 196.8, 175.0, 163.0, 130.6, 130.2, 114.1, 67.9, 67.1, 66.9, 46.1, 42.1, 35.2, 33.7, 29.2, 26.4, 24.0, 17.8. **HRMS** (ESI) calculated for [C<sub>19</sub>H<sub>27</sub>NO<sub>4</sub>+H]<sup>+</sup> 334.2018, found 334.2003. **Chiral HPLC** (Daicel OJ-H, 95:5 hexanes:isopropanol): ee = 90%, es = 95%.

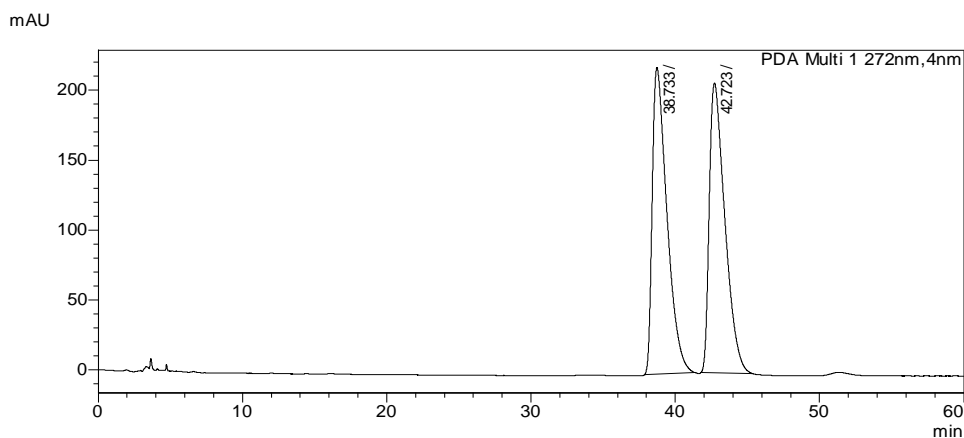

| Peak# | Ret. Time | Area     | Area% |
|-------|-----------|----------|-------|
| 1     | 38.733    | 15517933 | 49.97 |
| 2     | 42.723    | 15536754 | 50.03 |
| Total |           | 31054687 | 100   |

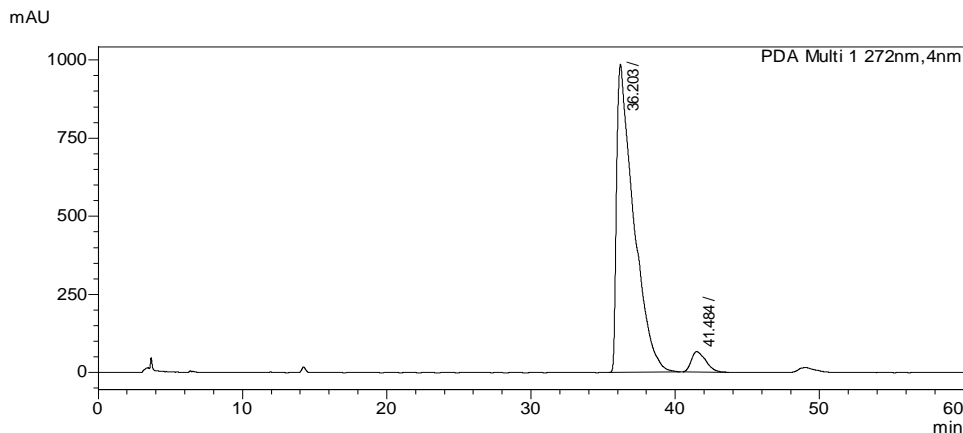

| Peak# | Ret. Time | Area     | Area%  |
|-------|-----------|----------|--------|
| 1     | 36.203    | 83864254 | 94.774 |
| 2     | 41.485    | 4624130  | 5.226  |
| Total |           | 88488384 | 100    |

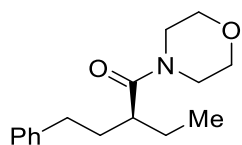

**(S)-2-ethyl-1-morpholino-4-phenylbutan-1-one (12)** was obtained from General Carbonylation Procedure A (43% NMR yield) and the crude product was purified via flash chromatography using a gradient of 20-75% EtOAc/hexanes yielding **12** as a colorless oil (19.5 mg, 30%). **<sup>1</sup>H NMR** (600 MHz, Chloroform-*d*)  $\delta$  7.30 (t,  $J$  = 7.6 Hz, 2H), 7.24 – 7.18 (m, 1H), 7.20 – 7.16 (m, 2H), 3.69 (d,  $J$  = 2.6 Hz, 4H), 3.60 (t,  $J$  = 4.8 Hz, 2H), 3.37 (dtt,  $J$  = 18.3, 13.4, 4.3 Hz, 2H), 2.68 (ddd,  $J$  = 14.4, 8.8, 5.9 Hz, 1H), 2.58 – 2.48 (m, 2H), 2.06 (dtd,  $J$  = 14.4, 8.6, 5.9 Hz, 1H), 1.83 – 1.65 (m, 2H), 1.59 – 1.49 (m, 1H), 0.89 (t,  $J$  = 7.4 Hz, 3H). **<sup>13</sup>C NMR** (151 MHz, CDCl<sub>3</sub>)  $\delta$  174.3, 141.8, 128.43, 128.41, 126.0, 67.2, 66.9, 46.0, 42.1, 41.1, 33.8, 33.5, 25.9, 12.0. **HRMS** (ESI) calculated for [C<sub>16</sub>H<sub>23</sub>NO<sub>2</sub>+H]<sup>+</sup> 262.1807, found 262.1782. **Chiral HPLC** (Daicel OJ-H, 90:10 hexanes:isopropanol): ee = 96%, es = 97%.

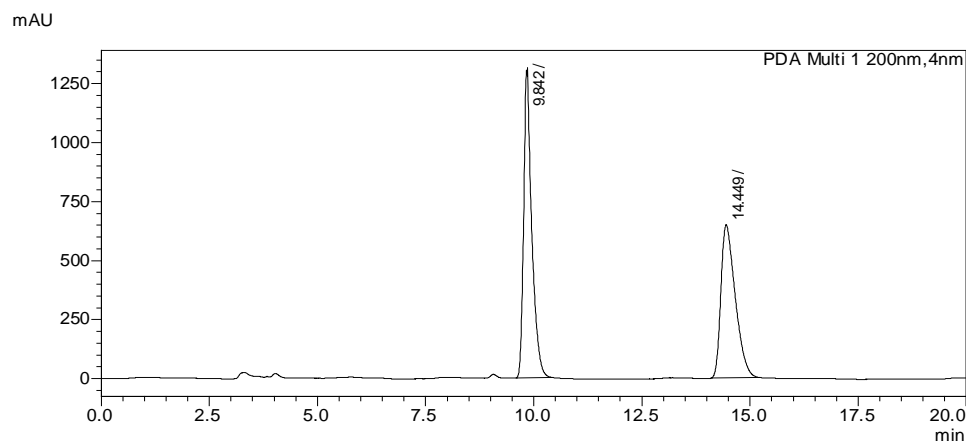

| Peak# | Ret. Time | Area     | Area%  |
|-------|-----------|----------|--------|
| 1     | 9.855     | 38711492 | 49.541 |
| 2     | 14.448    | 39428521 | 50.459 |
| Total |           | 78140013 | 100    |

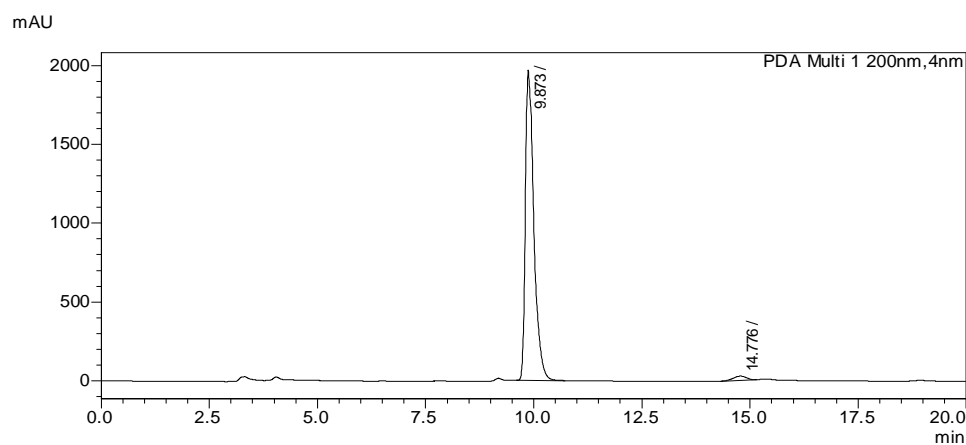

| Peak# | Ret. Time | Area     | Area%  |
|-------|-----------|----------|--------|
| 1     | 9.873     | 26943391 | 97.887 |
| 2     | 14.776    | 581570   | 2.113  |
| Total |           | 27524961 | 100    |

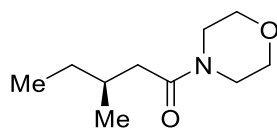

**(S)-3-methyl-1-morpholinopentan-1-one (13)** was obtained from General Carbonylation Procedure A (53% NMR yield) and the crude product was purified via flash chromatography using a gradient of 20-50% EtOAc/hexanes yielding **13** as a colorless oil (19 mg, 41%). <sup>1</sup>H NMR (600 MHz, Chloroform-*d*) δ 3.71 – 3.62 (m, 6H), 3.52 – 3.48 (m,



2H), 2.33 (dd,  $J = 14.6, 5.9$  Hz, 1H), 2.14 (dd,  $J = 14.6, 8.2$  Hz, 1H), 1.97 – 1.86 (m, 1H), 1.46 – 1.37 (m, 1H), 1.30 – 1.18 (m, 1H), 0.96 (d,  $J = 6.6$  Hz, 3H), 0.92 (t,  $J = 7.4$  Hz, 3H).  $^{13}\text{C}$  NMR (151 MHz,  $\text{CDCl}_3$ )  $\delta$  171.4, 67.1, 66.8, 46.3, 41.9, 40.0, 32.0, 29.7, 19.5, 11.5. HRMS (ESI) calculated for  $[\text{C}_{10}\text{H}_{19}\text{NO}_2+\text{H}]^+$  186.1494, found 186.1475. **Chiral HPLC** (Chiralpak IF, 98:2 hexanes:isopropanol): ee = 98%.

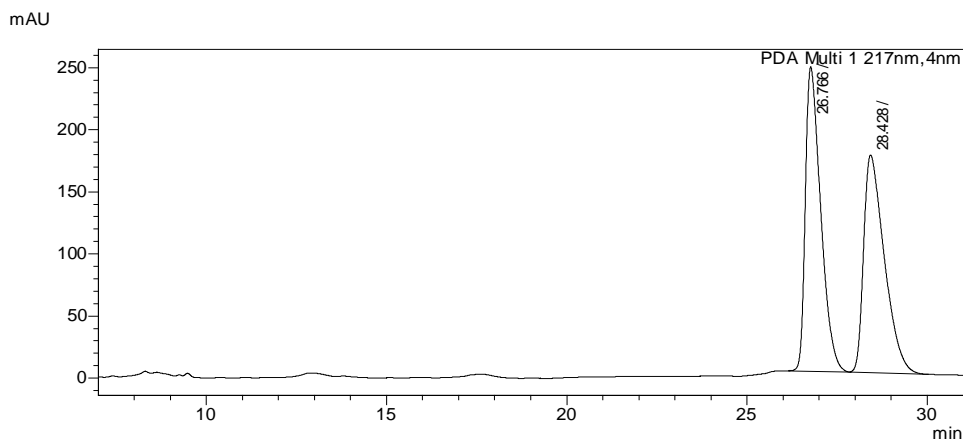

| Peak# | Ret. Time | Area     | Area% |
|-------|-----------|----------|-------|
| 1     | 26.767    | 30912633 | 56.41 |
| 2     | 28.428    | 23886895 | 43.59 |
| Total |           | 54799528 | 100   |

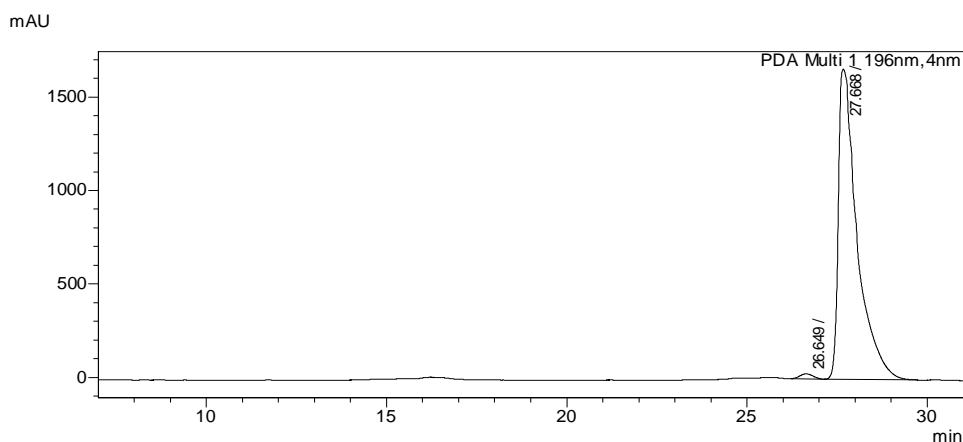

| Peak# | Ret. Time | Area     | Area%  |
|-------|-----------|----------|--------|
| 1     | 26.649    | 695291   | 1.151  |
| 2     | 27.668    | 59721506 | 98.849 |
| Total |           | 60416796 | 100    |

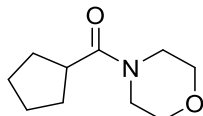

**Cyclopentyl(morpholino)methanone (14)** was obtained from General Carbonylation Procedure A and the crude product was purified via flash chromatography using a gradient of 10-50% EtOAc/hexanes yielding **14** as a colorless oil (27 mg, 59%). **<sup>1</sup>H NMR** (600 MHz, Chloroform-*d*)  $\delta$  3.70 – 3.66 (m, 4H), 3.64 (dd, *J* = 5.8, 3.9 Hz, 2H), 3.56 – 3.51 (m, 2H), 2.87 (p, *J* = 8.0 Hz, 1H), 1.91 – 1.78 (m, 4H), 1.81 – 1.74 (m, 1H), 1.76 – 1.69 (m, 1H), 1.64 – 1.53 (m, 2H). **<sup>13</sup>C NMR** (151 MHz, CDCl<sub>3</sub>)  $\delta$  174.8, 67.0, 66.8, 46.0, 42.2, 40.9, 30.1, 26.0. **HRMS** (ESI) calculated for [C<sub>10</sub>H<sub>17</sub>NO<sub>2</sub>+H]<sup>+</sup> 184.1338, found 184.1327.

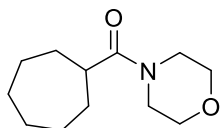

**Cycloheptyl(morpholino)methanone (15)** was obtained from General Carbonylation Procedure A and the crude product was purified via flash chromatography using a gradient of 10-50% EtOAc/hexanes yielding **15** as a white solid (31 mg, 59%). **<sup>1</sup>H NMR** (600 MHz, Chloroform-*d*)  $\delta$  3.68 (t, *J* = 5.5 Hz, 4H), 3.62 (t, *J* = 4.7 Hz, 2H), 3.50 (t, *J* = 4.8 Hz, 2H), 2.61 (tt, *J* = 9.7, 3.7 Hz, 1H), 1.86 – 1.78 (m, 2H), 1.81 – 1.76 (m, 2H), 1.75 – 1.66 (m, 2H), 1.58 (dq, *J* = 8.7, 5.5, 4.0 Hz, 4H), 1.46 (tt, *J* = 15.4, 8.8, 4.1 Hz, 2H). **<sup>13</sup>C NMR** (151 MHz, CDCl<sub>3</sub>)  $\delta$  175.9, 67.1, 66.8, 46.1, 42.0, 41.4, 31.2, 28.2, 26.7. **HRMS** (ESI) calculated for [C<sub>12</sub>H<sub>21</sub>NO<sub>2</sub>+H]<sup>+</sup> 212.1651, found 212.1641.

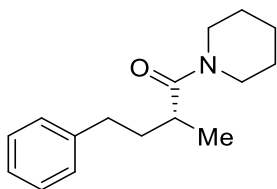

**(R)-2-methyl-4-phenyl-1-(piperidin-1-yl)butan-1-one (16)** was obtained from General Carbonylation Procedure A and the crude product was purified via flash chromatography using a gradient of 10-40% EtOAc/hexanes yielding **16** as a pale yellow oil (37.5 mg, 61%). **<sup>1</sup>H NMR** (600 MHz, Chloroform-*d*)  $\delta$  7.33 – 7.26 (m, 2H), 7.23 – 7.17 (m, 3H), 3.65

(ddd,  $J = 13.2, 6.7, 4.4$  Hz, 1H), 3.54 (ddd,  $J = 13.0, 7.0, 4.3$  Hz, 1H), 3.33 (qt,  $J = 13.4, 5.5$  Hz, 2H), 2.73 – 2.63 (m, 2H), 2.60 (ddd,  $J = 13.7, 8.8, 6.7$  Hz, 1H), 2.08 (dddd,  $J = 13.6, 9.0, 7.5, 6.2$  Hz, 1H), 1.76 – 1.59 (m, 3H), 1.60 – 1.48 (m, 3H), 1.15 (d,  $J = 6.8$  Hz, 3H).  $^{13}\text{C}$  NMR (151 MHz,  $\text{CDCl}_3$ )  $\delta$  174.4, 142.1, 128.5, 128.3, 125.8, 46.4, 42.9, 35.6, 34.3, 33.6, 26.8, 25.8, 24.7, 17.7. HRMS (ESI) calculated for  $[\text{C}_{16}\text{H}_{23}\text{NO}+\text{H}]^+$  246.1858, found 246.1860. Chiral HPLC (Chiralpak IE, 95:5 hexanes:isopropanol): ee = 93%, es = 94%.

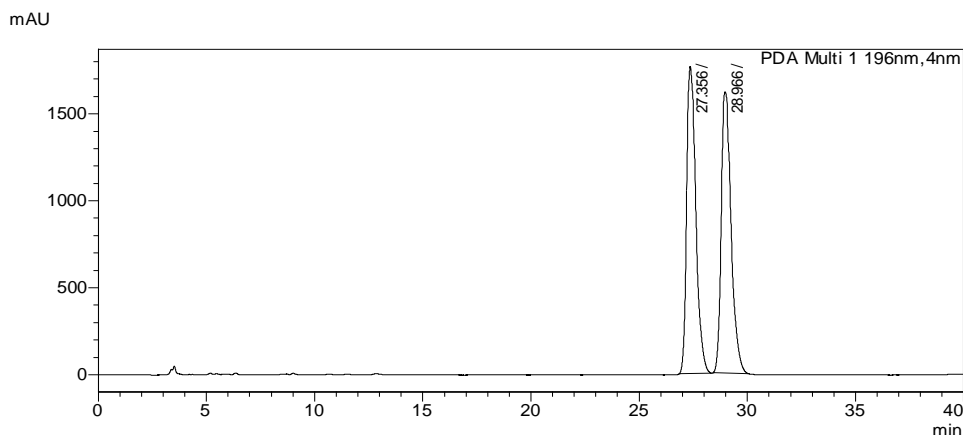

| Peak# | Ret. Time | Area      | Area%  |
|-------|-----------|-----------|--------|
| 1     | 27.356    | 52206489  | 50.462 |
| 2     | 28.966    | 51250763  | 49.538 |
| Total |           | 103457252 | 100    |

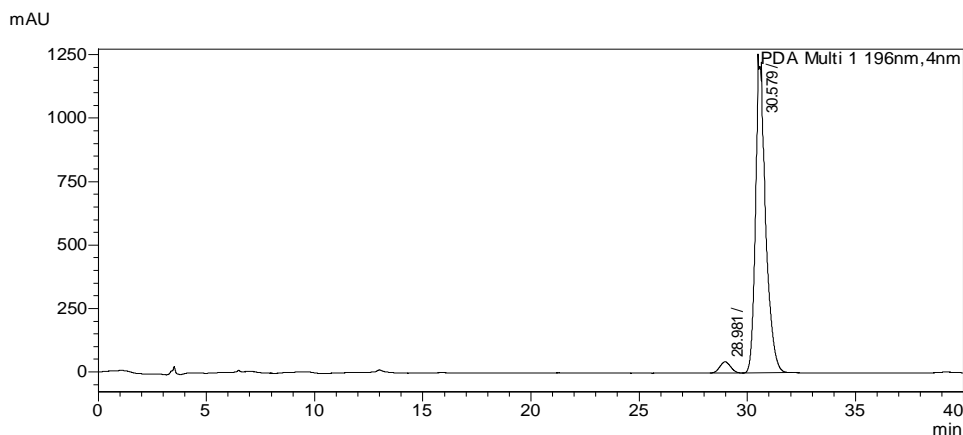

| Peak# | Ret. Time | Area     | Area% |
|-------|-----------|----------|-------|
| 1     | 28.981    | 1536174  | 3.69  |
| 2     | 30.579    | 40089340 | 96.31 |
| Total |           | 41625513 | 100   |

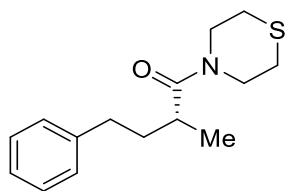

**(R)-2-methyl-4-phenyl-1-thiomorpholinobutan-1-one (17)** was obtained from General Carbonylation Procedure A and the crude product was purified via flash chromatography using a gradient of 30-75% EtOAc/hexanes yielding **17** as a pale yellow oil (39.2 mg, 60%). **<sup>1</sup>H NMR** (600 MHz, Chloroform-*d*)  $\delta$  7.41 – 7.26 (m, 2H), 7.26 – 7.11 (m, 3H), 3.98 (dt, *J* = 14.2, 4.9 Hz, 1H), 3.86 (qd, *J* = 12.4, 10.3, 5.3 Hz, 1H), 3.62 (qt, *J* = 14.1, 5.1 Hz, 2H), 2.64 (tdd, *J* = 14.3, 12.2, 6.7 Hz, 6H), 2.52 (t, *J* = 5.1 Hz, 2H), 2.08 (tdd, *J* = 13.7, 8.8, 6.6 Hz, 1H), 1.83 – 1.66 (m, 2H), 1.16 (d, *J* = 6.8 Hz, 3H). **<sup>13</sup>C NMR** (151 MHz, CDCl<sub>3</sub>)  $\delta$  174.7, 141.7, 128.5, 128.4, 126.0, 48.0, 44.4, 35.5, 34.3, 33.4, 28.1, 27.6, 17.7. **HRMS** (ESI) calculated for [C<sub>15</sub>H<sub>22</sub>NOS+H]<sup>+</sup> 264.1422, found 264.1407. **Chiral HPLC** (Daicel OJ-H, 95:5 hexanes:isopropanol): ee = 94%, es = 95%.

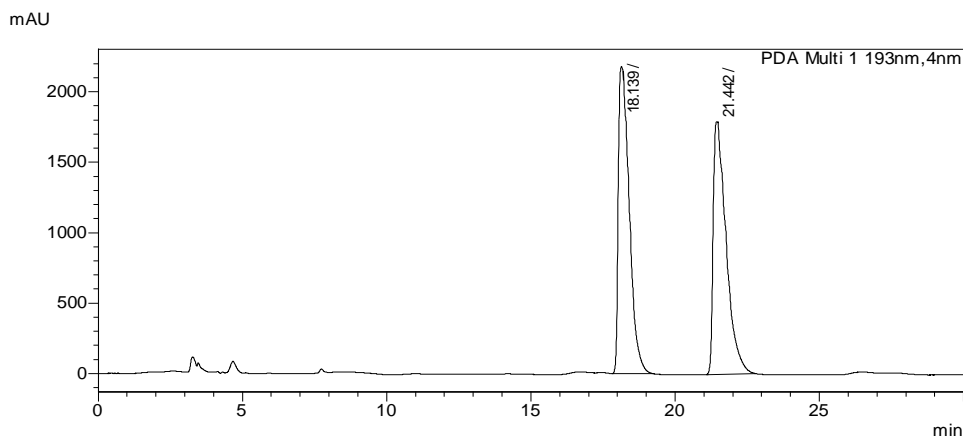

| Peak# | Ret. Time | Area      | Area%  |
|-------|-----------|-----------|--------|
| 1     | 18.139    | 57516633  | 50.782 |
| 2     | 21.442    | 55745812  | 49.218 |
| Total |           | 113262445 | 100    |

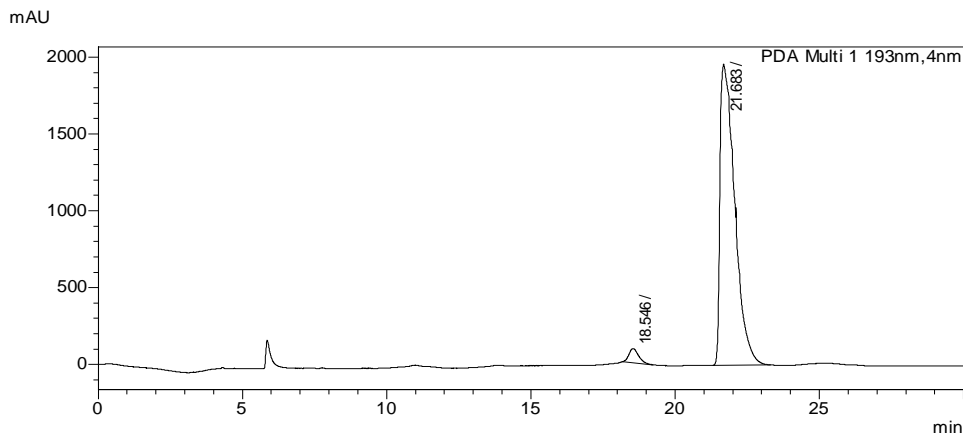

| Peak# | Ret. Time | Area     | Area% |
|-------|-----------|----------|-------|
| 1     | 18.546    | 2175038  | 3.03  |
| 2     | 21.683    | 69614730 | 96.97 |
| Total |           | 71789768 | 100   |

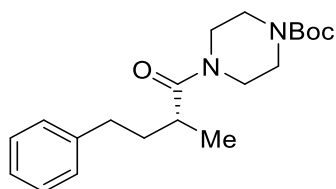

**tert-Butyl (R)-4-(2-methyl-4-phenylbutanoyl)piperazine-1-carboxylate (18)** was obtained from General Carbonylation Procedure A and the crude product was purified via flash chromatography using a gradient of 30-75% EtOAc/hexanes yielding **18** as a colorless oil in a mixture of conformers (61 mg, 70%). **<sup>1</sup>H NMR** (600 MHz, Chloroform-*d*)  $\delta$  7.31 – 7.25 (m, 2H), 7.22 – 7.13 (m, 3H), 4.67 – 4.48 (m, 2H), 3.73 – 3.62 (m, 2H), 3.03 – 2.96 (m, 1H), 2.80 – 2.69 (m, 1H), 2.69 – 2.52 (m, 3H), 2.09 – 2.01 (m, 1H), 2.00 – 1.91 (m, 1H), 1.72 – 1.63 (m, 1H), 1.51 – 1.41 (m, 9H), 1.28 – 1.16 (m, 1H), 1.15 – 1.10 (m, 3H). **<sup>13</sup>C NMR** (151 MHz, CDCl<sub>3</sub>)  $\delta$  174.6, 174.5, 155.1, 141.9, 141.8, 128.47, 128.45, 128.38, 128.35, 125.94, 125.90, 79.5, 48.0, 44.1, 40.8, 40.7, 35.53, 35.51, 34.3, 34.2, 33.5, 33.41, 33.39, 33.3, 32.3, 32.1, 28.4, 17.8, 17.5. **HRMS** (ESI) calculated for [C<sub>20</sub>H<sub>30</sub>N<sub>2</sub>O<sub>3</sub>+H]<sup>+</sup> 347.2335, found 347.2321. **Chiral HPLC** (Chiralpak IE, 95:5 hexanes:isopropanol): ee = 96%, es = 97%.

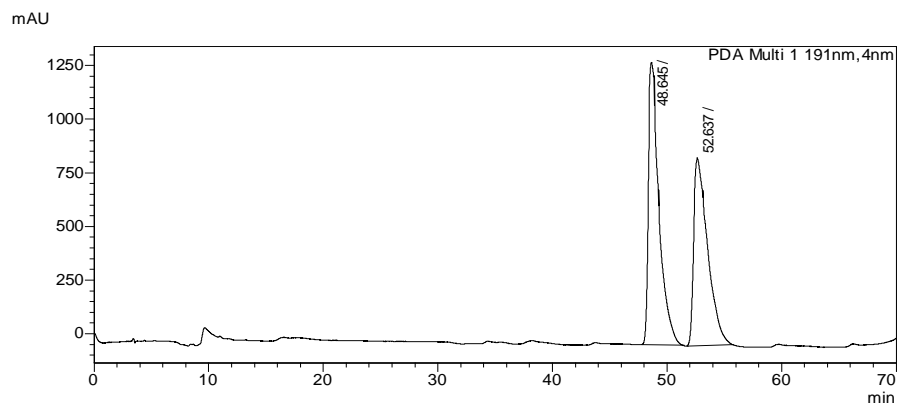

| Peak# | Ret. Time | Area      | Area%  |
|-------|-----------|-----------|--------|
| 1     | 48.645    | 84196139  | 53.353 |
| 2     | 52.637    | 73612782  | 46.647 |
| Total |           | 157808921 | 100    |

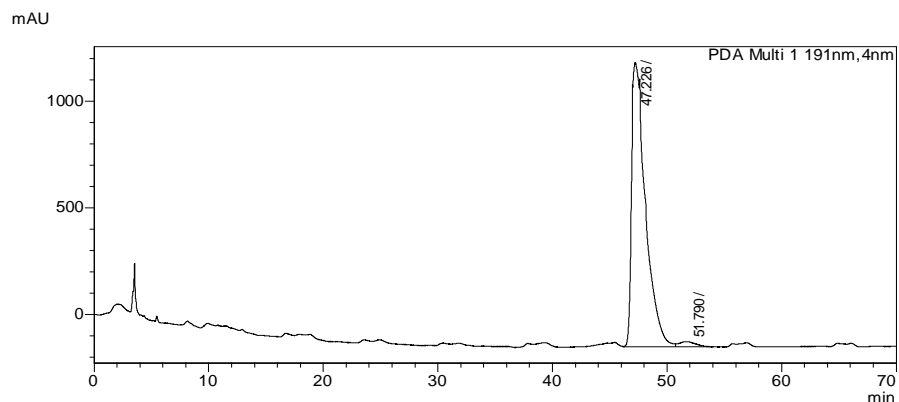

| Peak# | Ret. Time | Area      | Area%  |
|-------|-----------|-----------|--------|
| 1     | 47.226    | 111938873 | 97.818 |
| 2     | 51.79     | 2496843   | 2.182  |
| Total |           | 114435716 | 100    |

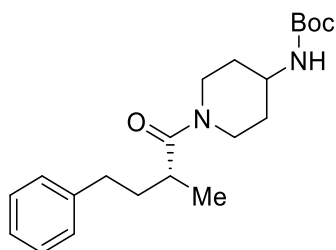

**tert-Butyl (R)-(1-(2-methyl-4-phenylbutanoyl)piperidin-4-yl)carbamate (19)** was obtained from General Carbonylation Procedure A and the crude product was purified via flash chromatography using a gradient of 30-75% EtOAc/hexanes yielding **19** as a pale

yellow solid in a mixture of rotamers (55 mg, 61%). **<sup>1</sup>H NMR** (600 MHz, Chloroform-*d*)  $\delta$  7.32 – 7.25 (m, 2H), 7.18 (dt,  $J$  = 18.1, 7.8 Hz, 3H), 4.55 (t,  $J$  = 11.6 Hz, 2H), 3.72 – 3.62 (m, 2H), 3.01 (ddd,  $J$  = 14.2, 11.7, 2.8 Hz, 1H), 2.75 (dd,  $J$  = 22.7, 11.9 Hz, 1H), 2.62 (dtd,  $J$  = 45.5, 14.6, 14.1, 7.2 Hz, 3H), 2.09 – 2.00 (m, 1H), 1.99 – 1.91 (m, 2H), 1.69 (dt,  $J$  = 13.6, 6.9 Hz, 1H), 1.46 (d,  $J$  = 4.4 Hz, 9H), 1.33 – 1.18 (m, 2H), 1.13 (t,  $J$  = 5.8 Hz, 3H). **<sup>13</sup>C NMR** (151 MHz, CDCl<sub>3</sub>)  $\delta$  174.6, 174.5, 155.1, 141.9, 141.8, 128.5, 128.38, 128.36, 125.94, 125.90, 79.6, 48.0, 44.1, 40.8, 40.7, 35.5, 34.28, 34.25, 33.5, 33.41, 33.40, 33.3, 32.4, 32.2, 28.4, 17.7, 17.5. **HRMS** (ESI) calculated for [C<sub>21</sub>H<sub>32</sub>N<sub>2</sub>O<sub>3</sub>+H]<sup>+</sup> 361.2491, found 361.2473. **Chiral HPLC** (Daicel OJ-H, 90:10 hexanes:isopropanol): ee = 96%, es = 97%.

mAU

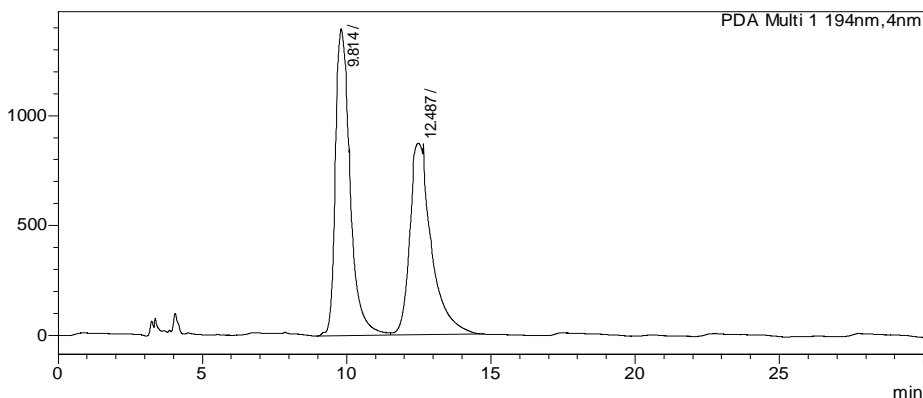

| Peak# | Ret. Time | Area     | Area%  |
|-------|-----------|----------|--------|
| 1     | 9.814     | 49648452 | 52.317 |
| 2     | 12.487    | 45250134 | 47.683 |
| Total |           | 94898586 | 100    |

mAU

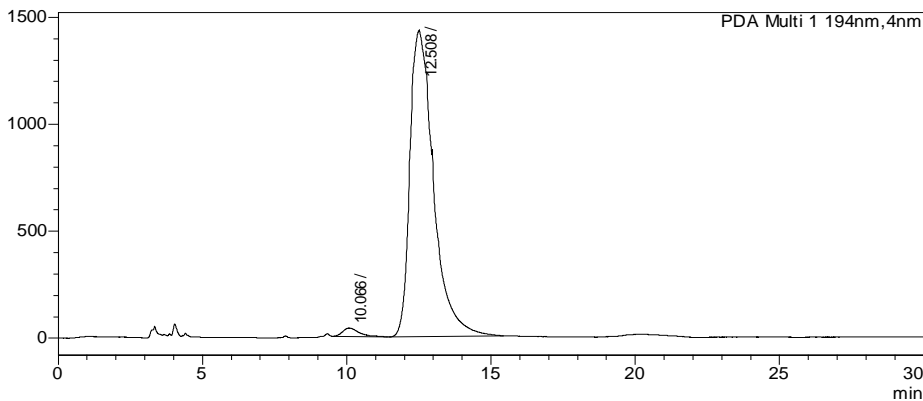

| Peak# | Ret. Time | Area    | Area% |
|-------|-----------|---------|-------|
| 1     | 10.066    | 1563424 | 1.887 |

|       |        |          |        |
|-------|--------|----------|--------|
| 2     | 12.508 | 81307904 | 98.113 |
| Total |        | 82871328 | 100    |

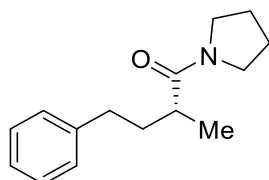

**(R)-2-methyl-4-phenyl-1-(pyrrolidin-1-yl)butan-1-one (20)** was obtained from General Carbonylation Procedure A and the crude product was purified via flash chromatography using a gradient of 20-75% EtOAc/hexanes yielding **20** as a pale yellow oil (35 mg, 61%). **<sup>1</sup>H NMR** (600 MHz, Chloroform-*d*)  $\delta$  7.32 – 7.26 (m, 2H), 7.25 – 7.17 (m, 3H), 3.50 (t,  $J$  = 6.8 Hz, 2H), 3.33 (dt,  $J$  = 9.7, 6.7 Hz, 1H), 3.25 (dt,  $J$  = 9.8, 6.7 Hz, 1H), 2.68 (ddd,  $J$  = 14.6, 8.9, 5.9 Hz, 1H), 2.61 (ddd,  $J$  = 13.6, 8.8, 7.0 Hz, 1H), 2.50 (ddd,  $J$  = 10.0, 8.2, 4.4 Hz, 1H), 2.14 – 2.04 (m, 1H), 1.97 – 1.82 (m, 4H), 1.71 (dddd,  $J$  = 13.1, 8.9, 7.0, 5.8 Hz, 1H), 1.16 (d,  $J$  = 6.8 Hz, 3H). **<sup>13</sup>C NMR** (151 MHz, CDCl<sub>3</sub>)  $\delta$  174.8, 142.0, 128.5, 128.3, 125.8, 46.3, 45.7, 37.1, 35.3, 33.6, 26.1, 24.4, 17.4. **HRMS** (ESI) calculated for [C<sub>15</sub>H<sub>21</sub>NO+H]<sup>+</sup> 232.1701, found 232.1704. **Chiral HPLC** (Daicel OJ-H, 95:5 hexanes:isopropanol): ee = 92%, es = 93%.

mAU

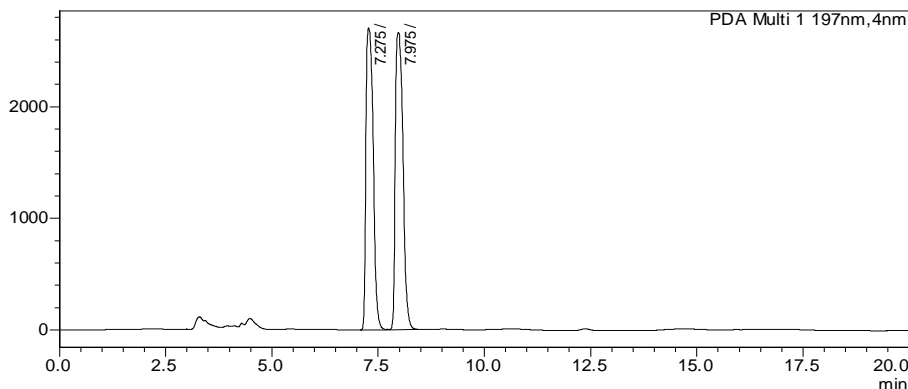

| Peak# | Ret. Time | Area     | Area%  |
|-------|-----------|----------|--------|
| 1     | 7.275     | 32231433 | 49.195 |
| 2     | 7.975     | 33285894 | 50.805 |
| Total |           | 65517327 | 100    |



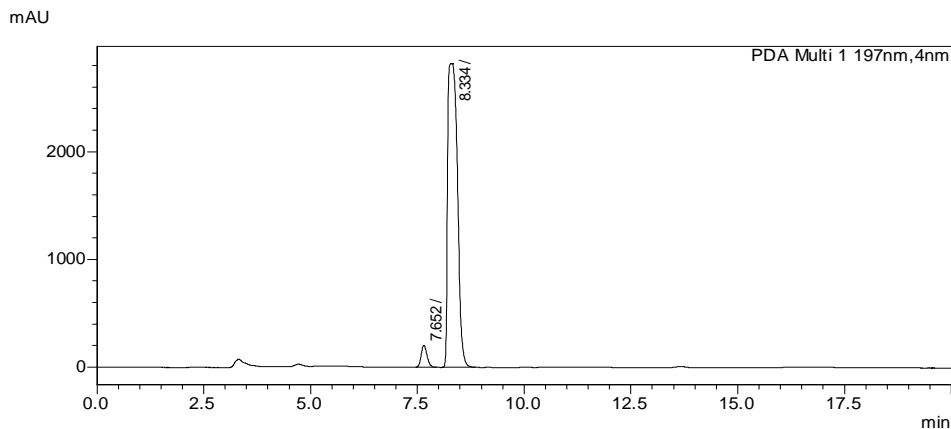

| Peak# | Ret. Time | Area     | Area% |
|-------|-----------|----------|-------|
| 1     | 7.652     | 1932688  | 4.16  |
| 2     | 8.334     | 44527812 | 95.84 |
| Total |           | 46460501 | 100   |

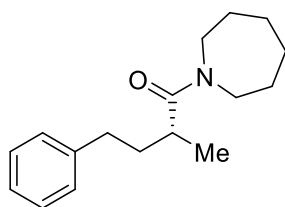

**(R)-1-(azepan-1-yl)-2-methyl-4-phenylbutan-1-one (21)** was obtained from General Carbonylation Procedure A and the crude product was purified via flash chromatography using a gradient of 10-50% EtOAc/hexanes yielding **21** as a colorless oil (35 mg, 54%). **<sup>1</sup>H NMR** (600 MHz, Chloroform-*d*)  $\delta$  7.31 – 7.26 (m, 2H), 7.19 (dd,  $J = 8.5, 7.1$  Hz, 2H), 3.59 (dt,  $J = 13.8, 6.2$  Hz, 1H), 3.52 (dt,  $J = 13.7, 6.1$  Hz, 1H), 3.40 – 3.28 (m, 2H), 2.66 (ddd,  $J = 15.6, 9.4, 6.5$  Hz, 2H), 2.60 (ddd,  $J = 13.7, 9.1, 6.4$  Hz, 1H), 2.13 – 2.04 (m, 1H), 1.77 – 1.68 (m, 3H), 1.68 – 1.51 (m, 6H), 1.17 (d,  $J = 6.8$  Hz, 3H). **<sup>13</sup>C NMR** (151 MHz, CDCl<sub>3</sub>)  $\delta$  175.9, 142.1, 128.4, 128.3, 125.8, 47.7, 46.2, 35.8, 34.9, 33.7, 29.4, 27.8, 26.8, 26.8, 18.1. **HRMS** (ESI) calculated for [C<sub>17</sub>H<sub>25</sub>NO+H]<sup>+</sup> 260.2014, found 260.2000. **Chiral HPLC** (Chiralpak IE, 95:5 hexanes:isopropanol): ee = 95%, es = 96%.

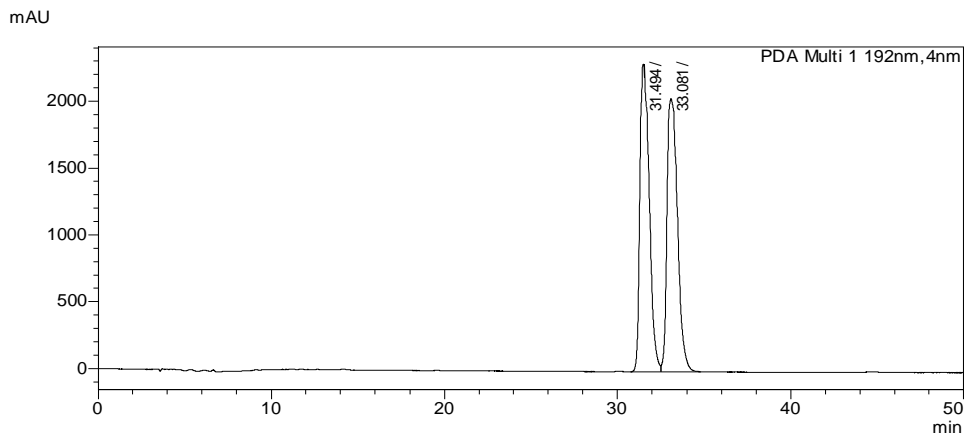

| Peak# | Ret. Time | Area      | Area%  |
|-------|-----------|-----------|--------|
| 1     | 31.494    | 86771051  | 50.174 |
| 2     | 33.081    | 86168470  | 49.826 |
| Total |           | 172939521 | 100    |

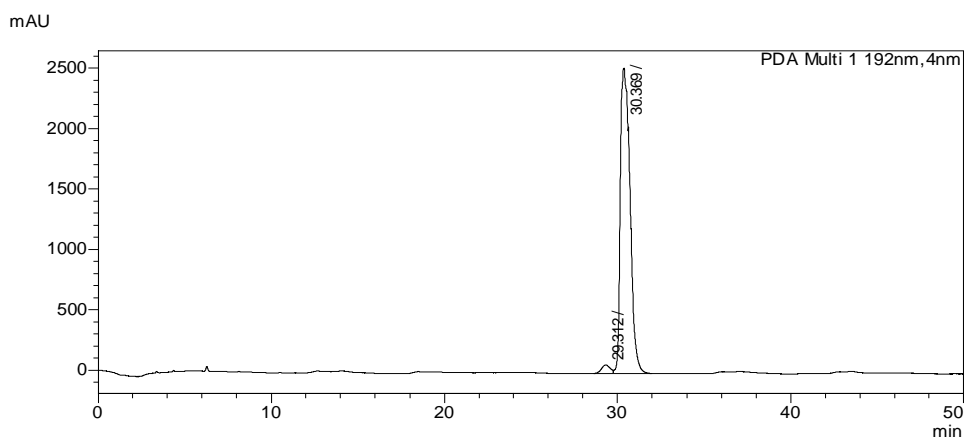

| Peak# | Ret. Time | Area      | Area%  |
|-------|-----------|-----------|--------|
| 1     | 29.312    | 2455913   | 2.431  |
| 2     | 30.369    | 98564417  | 97.569 |
| Total |           | 101020330 | 100    |

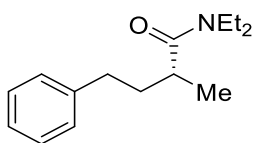

**(R)-N,N-diethyl-2-methyl-4-phenylbutanamide (22)** was obtained from General Carbonylation Procedure A (24 h) and the crude product was purified via flash chromatography using a gradient of 10-30% EtOAc/hexanes yielding **22** as a pale yellow oil (32 mg, 55%). <sup>1</sup>H NMR (600 MHz, Chloroform-*d*) δ 7.32 – 7.26 (m, 2H), 7.22 – 7.17

(m, 3H), 3.45 (dq,  $J = 14.1, 7.1$  Hz, 1H), 3.34 (dq,  $J = 14.0, 7.1$  Hz, 1H), 3.25 – 3.16 (m, 2H), 2.69 – 2.56 (m, 3H), 2.06 (dddd,  $J = 13.9, 9.1, 7.8, 6.3$  Hz, 1H), 1.77 – 1.67 (m, 1H), 1.17 (d,  $J = 6.8$  Hz, 3H), 1.14 (t,  $J = 7.1$  Hz, 3H), 1.09 (t,  $J = 7.1$  Hz, 3H).  $^{13}\text{C}$  NMR (151 MHz,  $\text{CDCl}_3$ )  $\delta$  175.6, 142.0, 128.5, 128.3, 125.8, 41.8, 40.3, 35.9, 34.7, 33.6, 18.1, 14.8, 13.2. **HRMS** (ESI) calculated for  $[\text{C}_{15}\text{H}_{23}\text{NO}+\text{H}]^+$  234.1858, found 234.1860. **Chiral HPLC** (Chiralpak IF, 98:2 hexanes:isopropanol): ee = 91%, es = 92%.

mAU

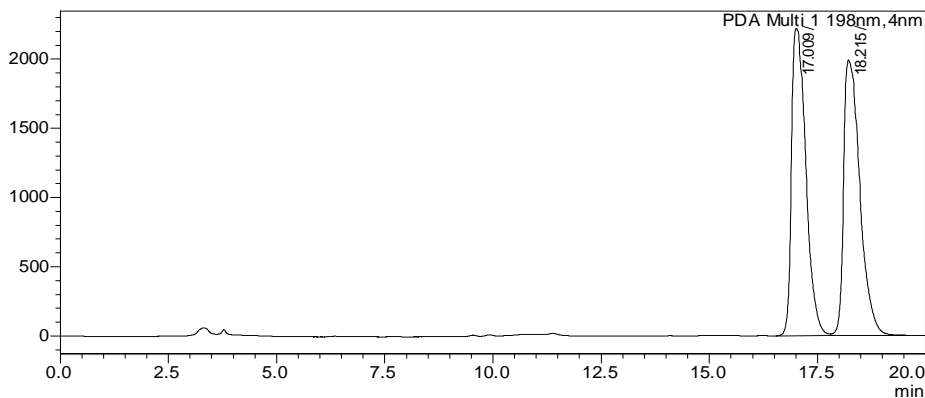

| Peak# | Ret. Time | Area      | Area%  |
|-------|-----------|-----------|--------|
| 1     | 17.009    | 51182177  | 49.666 |
| 2     | 18.215    | 51871090  | 50.334 |
| Total |           | 103053267 | 100    |

mAU

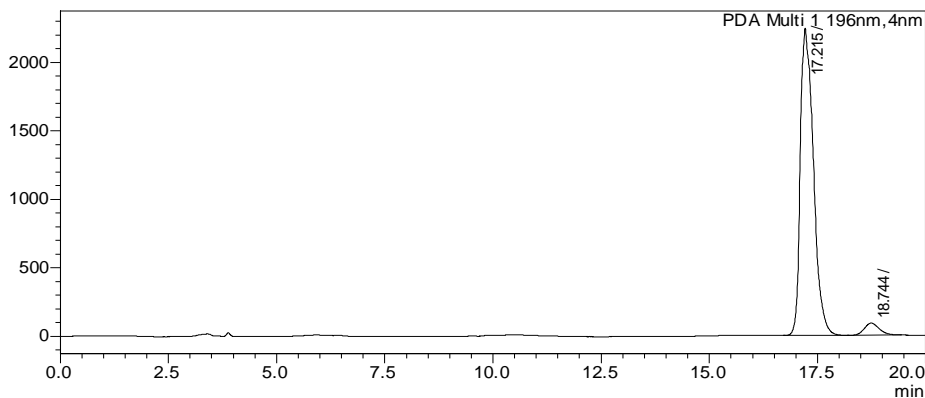

| Peak# | Ret. Time | Area     | Area%  |
|-------|-----------|----------|--------|
| 1     | 17.215    | 47336897 | 95.612 |
| 2     | 18.739    | 2172677  | 4.388  |
| Total |           | 49509574 | 100    |

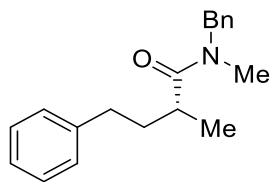

**(R)-N-benzyl-N,2-dimethyl-4-phenylbutanamide (23)** was obtained from General Carbonylation Procedure A and the crude product was purified via flash chromatography using a gradient of 10-30% EtOAc/hexanes yielding **23** as a pale yellow oil in a mixture of rotamers (51 mg, 72%). **<sup>1</sup>H NMR** (600 MHz, Chloroform-*d*)  $\delta$  7.44 – 7.23 (m, 12H), 7.18 (ddd,  $J = 18.1, 10.8, 7.3$  Hz, 6H), 7.11 (d,  $J = 7.6$  Hz, 2H), 4.70 (d,  $J = 14.6$  Hz, 1H), 4.59 (d,  $J = 14.6$  Hz, 1H), 4.52 – 4.42 (m, 2H), 3.01 (s, 3H), 2.84 (s, 3H), 2.73 (ddt,  $J = 13.6, 9.4, 6.4$  Hz, 3H), 2.64 (dq,  $J = 13.5, 6.0$  Hz, 2H), 2.57 (ddd,  $J = 19.7, 9.9, 5.2$  Hz, 1H), 2.20 – 2.05 (m, 2H), 1.75 (ddt,  $J = 13.6, 9.1, 6.4$  Hz, 2H), 1.21 (d,  $J = 6.8$  Hz, 3H), 1.18 (d,  $J = 6.7$  Hz, 3H). **<sup>13</sup>C NMR** (151 MHz, CDCl<sub>3</sub>)  $\delta$  177.0, 176.3, 142.0, 141.9, 137.7, 137.0, 128.9, 128.6, 128.5, 128.40, 128.38, 128.0, 127.5, 127.3, 126.3, 125.9, 53.1, 50.9, 35.9, 35.6, 35.0, 34.8, 34.6, 34.4, 33.6, 18.0, 17.6. **HRMS** (ESI) calculated for [C<sub>19</sub>H<sub>23</sub>NO+H]<sup>+</sup> 282.1858, found 282.1844. **Chiral HPLC** (Chiralpak IF, 95:5 hexanes:isopropanol): ee = 91%, es = 92%.

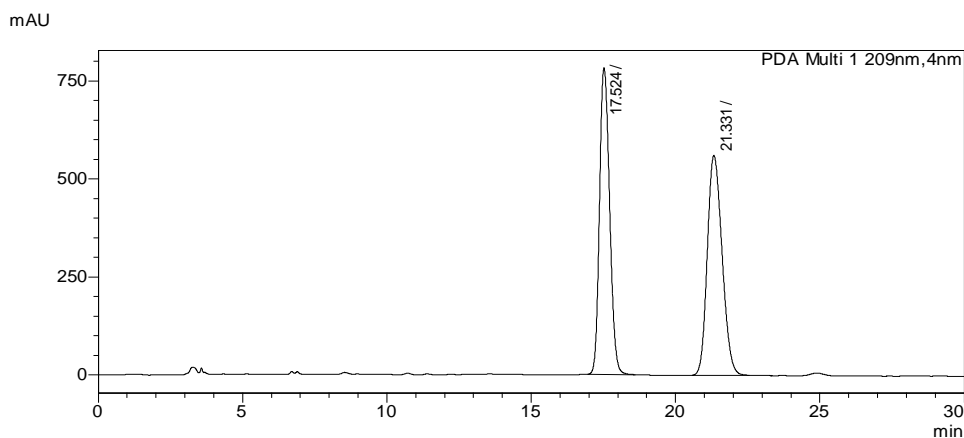

| Peak# | Ret. Time | Area     | Area%  |
|-------|-----------|----------|--------|
| 1     | 17.524    | 18224315 | 48.844 |
| 2     | 21.331    | 19086603 | 51.156 |
| Total |           | 37310918 | 100    |

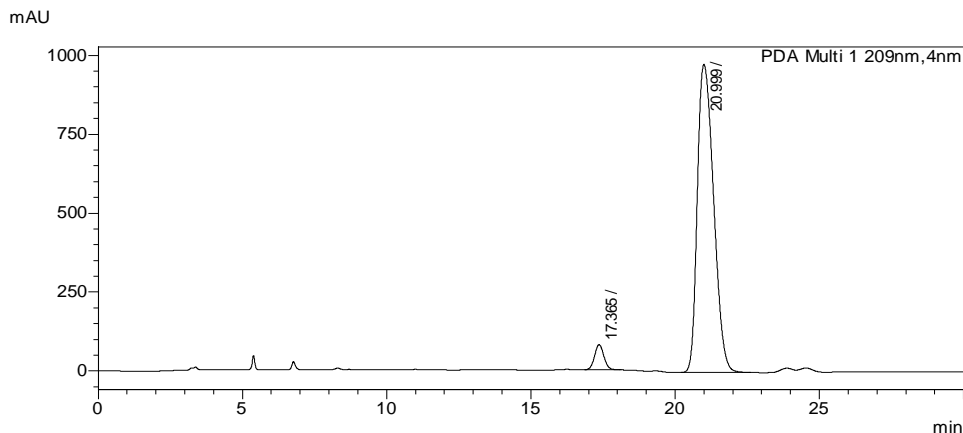

| Peak# | Ret. Time | Area     | Area%  |
|-------|-----------|----------|--------|
| 1     | 17.365    | 1800513  | 4.492  |
| 2     | 20.999    | 38284961 | 95.508 |
| Total |           | 40085474 | 100    |

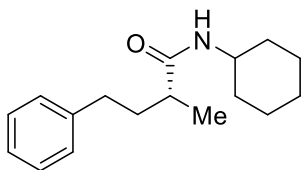

**(R)-N-cyclohexyl-2-methyl-4-phenylbutanamide (24)** was obtained from General Carbonylation Procedure A and the crude product was purified via flash chromatography using a gradient of 10-30% EtOAc/hexanes yielding **24** as a colorless oil (43.3 mg, 67%). **<sup>1</sup>H NMR** (600 MHz, Chloroform-*d*)  $\delta$  7.30 (d,  $J = 7.7$  Hz, 2H), 7.20 (ddd,  $J = 8.6, 7.2, 1.5$  Hz, 3H), 5.32 (s, 1H), 3.82 (dddd,  $J = 14.7, 10.8, 8.1, 3.9$  Hz, 1H), 2.68 (ddd,  $J = 14.7, 9.5, 5.6$  Hz, 1H), 2.59 (ddd,  $J = 13.8, 9.3, 6.9$  Hz, 1H), 2.17 – 2.10 (m, 1H), 2.06 – 1.95 (m, 2H), 1.92 (dtd,  $J = 12.0, 3.8, 1.8$  Hz, 1H), 1.78 – 1.68 (m, 3H), 1.67 – 1.61 (m, 1H), 1.39 (dddd,  $J = 13.6, 12.1, 10.4, 6.1$  Hz, 2H), 1.25 – 1.08 (m, 6H). **<sup>13</sup>C NMR** (151 MHz, CDCl<sub>3</sub>)  $\delta$  175.1, 141.9, 128.43, 128.39, 125.9, 47.9, 40.9, 35.8, 33.6, 33.4, 33.2, 25.6, 24.9, 18.1. **HRMS** (ESI) calculated for [C<sub>17</sub>H<sub>25</sub>NO+H]<sup>+</sup> 260.2014, found 260.2000. **Chiral HPLC** (Daicel OJ-H, 95:5 hexanes:isopropanol): ee = 97%, es = 98%.

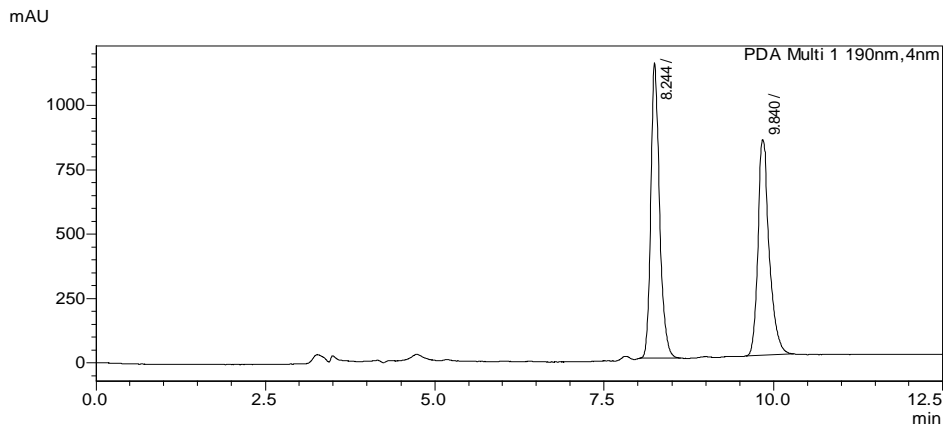

| Peak# | Ret. Time | Area     | Area%  |
|-------|-----------|----------|--------|
| 1     | 8.244     | 10305665 | 51.644 |
| 2     | 9.84      | 9649363  | 48.356 |
| Total |           | 19955028 | 100    |

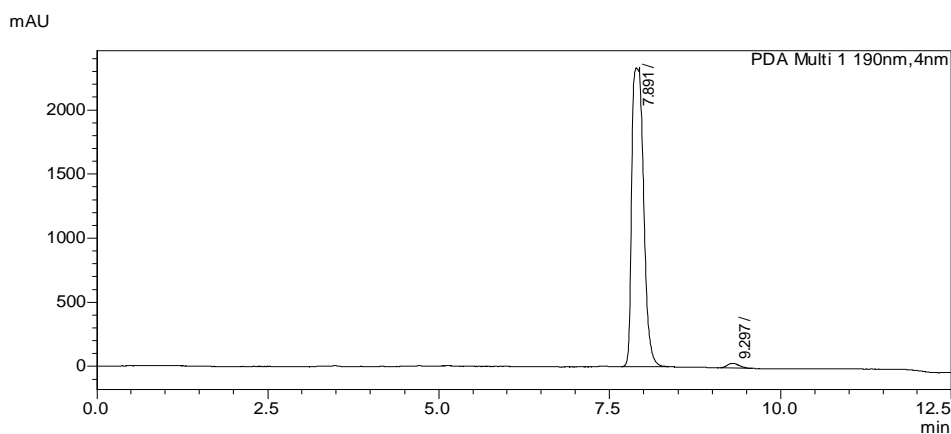

| Peak# | Ret. Time | Area     | Area%  |
|-------|-----------|----------|--------|
| 1     | 7.891     | 27986470 | 98.426 |
| 2     | 9.297     | 447648   | 1.574  |
| Total |           | 28434118 | 100    |

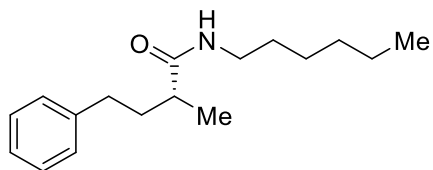

**(R)-N-hexyl-2-methyl-4-phenylbutanamide (25)** was obtained from General Carbonylation Procedure A (24 h) and the crude product was purified via flash chromatography using a gradient of 10-30% EtOAc/hexanes yielding **25** as a colorless oil

(39 mg, 60%). **<sup>1</sup>H NMR** (600 MHz, Chloroform-*d*) δ 7.32 – 7.28 (m, 2H), 7.23 – 7.17 (m, 3H), 5.49 (t, *J* = 5.7 Hz, 1H), 3.27 (dtdd, *J* = 20.5, 13.3, 7.2, 5.7 Hz, 2H), 2.67 (ddd, *J* = 14.8, 9.5, 5.8 Hz, 1H), 2.59 (ddd, *J* = 13.9, 9.3, 6.8 Hz, 1H), 2.22 – 2.13 (m, 1H), 2.03 (dtd, *J* = 14.3, 8.9, 5.8 Hz, 1H), 1.71 (ddt, *J* = 12.9, 9.5, 6.3 Hz, 1H), 1.52 (dd, *J* = 10.6, 4.5 Hz, 2H), 1.39 – 1.26 (m, 6H), 1.18 (d, *J* = 6.9 Hz, 3H), 0.93 – 0.88 (m, 3H). **<sup>13</sup>C NMR** (151 MHz, CDCl<sub>3</sub>) δ 176.0, 141.8, 128.40, 128.39, 125.9, 40.9, 39.4, 35.7, 33.6, 31.5, 29.7, 26.6, 22.6, 18.1, 14.0. **HRMS** (ESI) calculated for [C<sub>17</sub>H<sub>27</sub>NO+H]<sup>+</sup> 262.2171, found 262.2156. **Chiral HPLC** (Daicel OJ-H, 95:5 hexanes:isopropanol): ee = 91%, es = 92%.

mAU

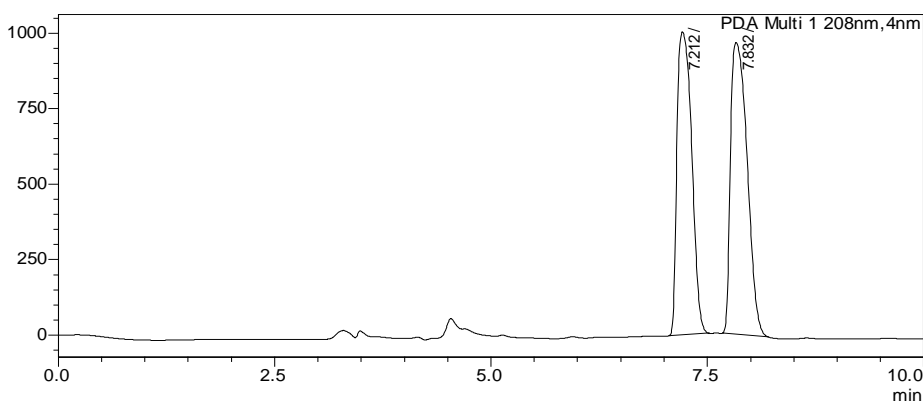

| Peak# | Ret. Time | Area     | Area%  |
|-------|-----------|----------|--------|
| 1     | 7.212     | 11845806 | 47.882 |
| 2     | 7.832     | 12893954 | 52.118 |
| Total |           | 24739760 | 100    |

mAU

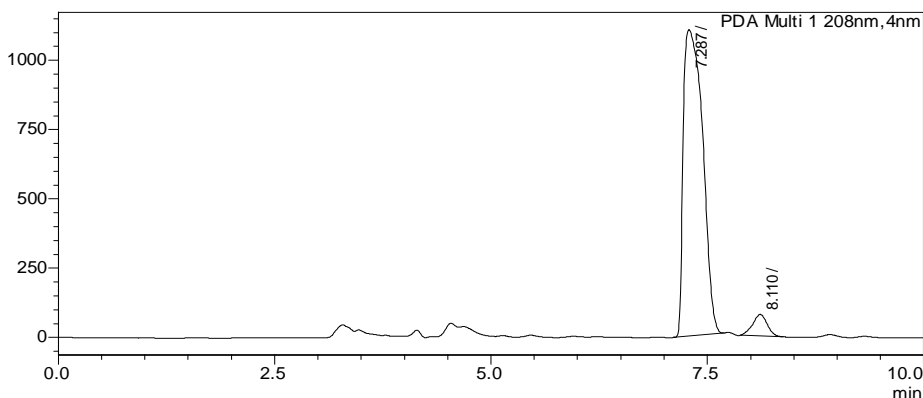

| Peak# | Ret. Time | Area     | Area%  |
|-------|-----------|----------|--------|
| 1     | 7.288     | 16315738 | 95.579 |
| 2     | 8.11      | 754612   | 4.421  |

|       |  |          |     |
|-------|--|----------|-----|
| Total |  | 17070350 | 100 |
|-------|--|----------|-----|

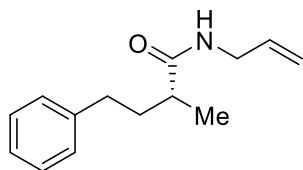

**(R)-N-allyl-2-methyl-4-phenylbutanamide (26)** was obtained from General Carbonylation Procedure A (24 h) and the crude product was purified via flash chromatography using a gradient of 10-30% EtOAc/hexanes yielding **26** as a cream colored solid (35 mg, 64%). **<sup>1</sup>H NMR** (600 MHz, Chloroform-*d*)  $\delta$  7.33 – 7.27 (m, 2H), 7.24 – 7.17 (m, 3H), 5.87 (ddt,  $J$  = 17.2, 10.2, 5.7 Hz, 1H), 5.64 (t,  $J$  = 5.9 Hz, 1H), 5.21 (dq,  $J$  = 17.2, 1.6 Hz, 1H), 5.16 (dq,  $J$  = 10.2, 1.4 Hz, 1H), 3.92 (qt,  $J$  = 5.7, 1.6 Hz, 2H), 2.68 (ddd,  $J$  = 13.7, 9.5, 5.9 Hz, 1H), 2.61 (ddd,  $J$  = 13.8, 9.3, 6.6 Hz, 1H), 2.28 – 2.19 (m, 1H), 2.04 (dddd,  $J$  = 14.0, 9.3, 8.3, 5.9 Hz, 1H), 1.73 (dddd,  $J$  = 13.5, 9.5, 6.6, 5.9 Hz, 1H), 1.21 (d,  $J$  = 6.9 Hz, 3H). **<sup>13</sup>C NMR** (151 MHz, CDCl<sub>3</sub>)  $\delta$  176.0, 141.8, 134.4, 128.4, 125.9, 116.4, 41.8, 40.8, 35.7, 33.6, 18.1. **HRMS** (ESI) calculated for [C<sub>14</sub>H<sub>19</sub>NO+H]<sup>+</sup> 218.1545, found 218.1534. **Chiral HPLC** (Daicel OJ-H, 95:5 hexanes:isopropanol): ee = 97%, es = 98%.

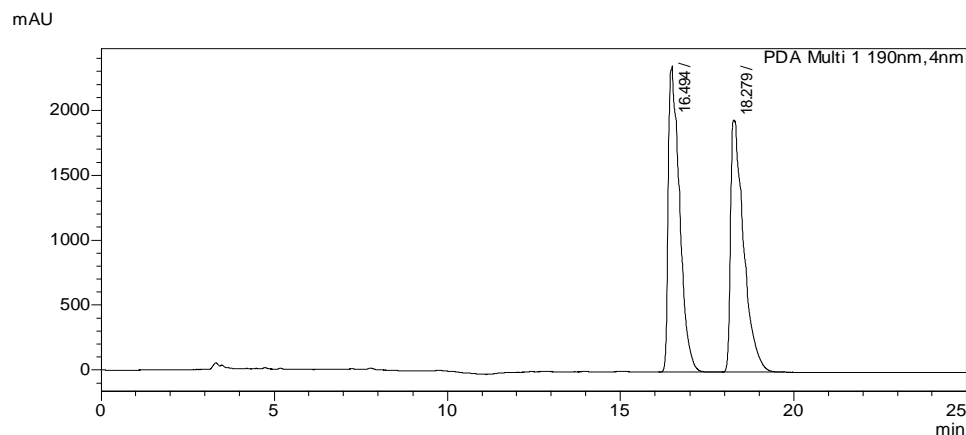

| Peak# | Ret. Time | Area      | Area%  |
|-------|-----------|-----------|--------|
| 1     | 16.494    | 53722713  | 51.194 |
| 2     | 18.279    | 51217627  | 48.806 |
| Total |           | 104940339 | 100    |



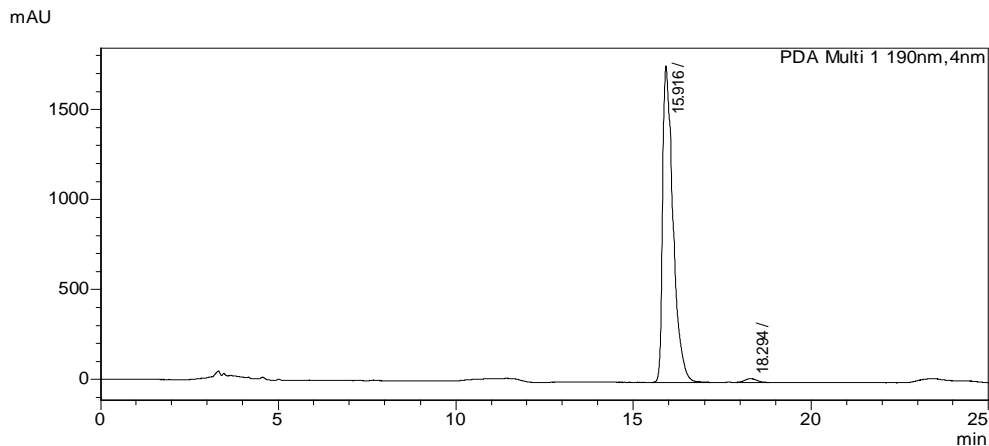

| Peak# | Ret. Time | Area     | Area% |
|-------|-----------|----------|-------|
| 1     | 15.916    | 35869165 | 98.65 |
| 2     | 18.294    | 490741   | 1.35  |
| Total |           | 36359905 | 100   |

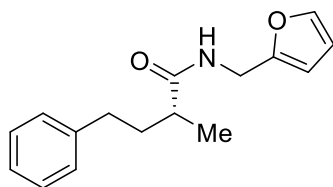

**(R)-N-(furan-2-ylmethyl)-2-methyl-4-phenylbutanamide (27)** was obtained from General Carbonylation Procedure A and the crude product was purified via flash chromatography using a gradient of 20-40% EtOAc/hexanes yielding **27** as a white, fluffy solid (43 mg, 67%). **<sup>1</sup>H NMR** (600 MHz, Chloroform-*d*) δ 7.39 (d, *J* = 1.8 Hz, 1H), 7.31 – 7.26 (m, 2H), 7.24 – 7.17 (m, 1H), 7.18 – 7.14 (m, 2H), 6.35 (dd, *J* = 3.2, 1.9 Hz, 1H), 6.26 (d, *J* = 3.2 Hz, 1H), 5.87 (t, *J* = 5.6 Hz, 1H), 4.52 (dd, *J* = 15.5, 5.7 Hz, 1H), 4.42 (dd, *J* = 15.5, 5.3 Hz, 1H), 2.66 (ddd, *J* = 14.7, 9.4, 5.7 Hz, 1H), 2.58 (ddd, *J* = 13.8, 9.2, 6.9 Hz, 1H), 2.26 – 2.17 (m, 1H), 2.08 – 1.99 (m, 1H), 1.73 (dddd, *J* = 13.1, 9.4, 6.9, 5.7 Hz, 1H), 1.20 (d, *J* = 6.9 Hz, 3H). **<sup>13</sup>C NMR** (151 MHz, CDCl<sub>3</sub>) δ 175.9, 151.5, 142.2, 141.7, 128.4, 125.9, 110.5, 107.4, 40.7, 36.4, 35.7, 33.5, 18.0. **HRMS** (ESI) calculated for [C<sub>16</sub>H<sub>19</sub>NO<sub>2</sub>+H]<sup>+</sup> 258.1494, found 258.1481. **Chiral HPLC** (Daicel OJ-H, 95:5 hexanes:isopropanol): ee = 99%, es = 99%.

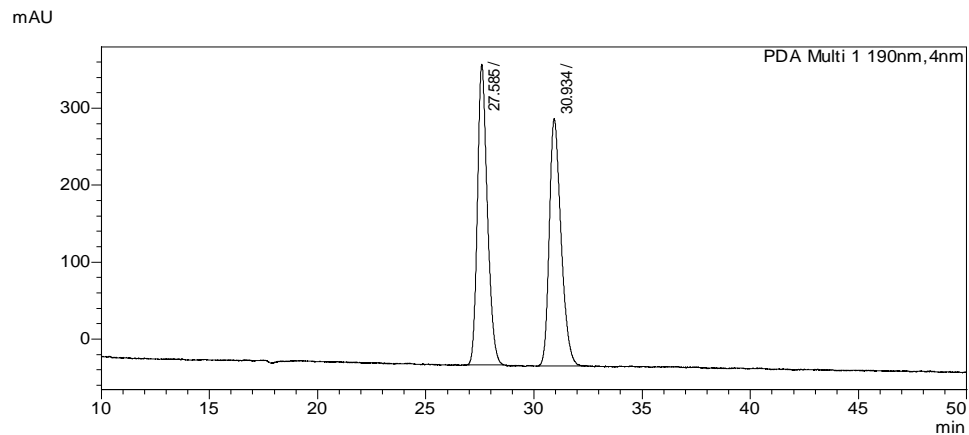

| Peak# | Ret. Time | Area     | Area%  |
|-------|-----------|----------|--------|
| 1     | 27.585    | 12432345 | 50.591 |
| 2     | 30.934    | 12142105 | 49.409 |
| Total |           | 24574450 | 100    |

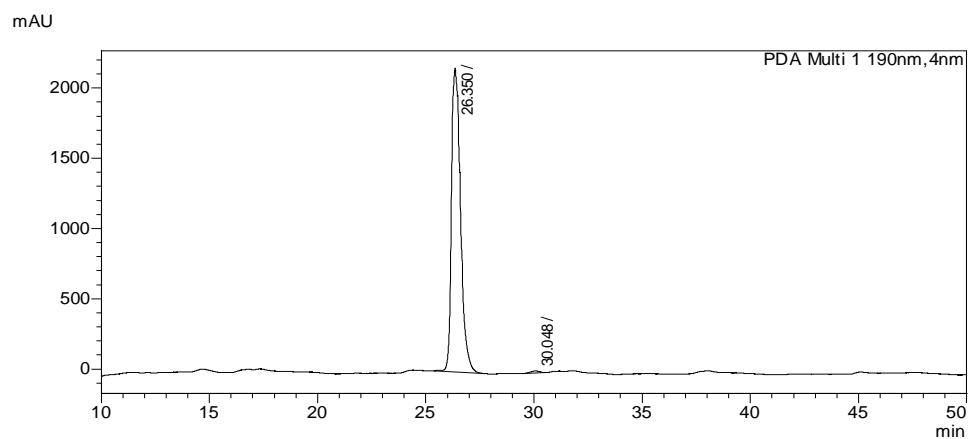

| Peak# | Ret. Time | Area     | Area%  |
|-------|-----------|----------|--------|
| 1     | 26.350    | 62863396 | 99.305 |
| 2     | 30.048    | 439810   | 0.695  |
| Total |           | 63303206 | 100    |

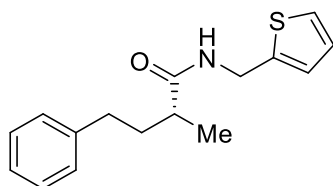

**(R)-2-methyl-4-phenyl-N-(thiophen-2-ylmethyl)butanamide (28)** was obtained from General Carbonylation Procedure A and the crude product was purified via flash chromatography using a gradient of 20-40% EtOAc/hexanes yielding **28** as a cream

colored solid (48 mg, 70%). **<sup>1</sup>H NMR** (600 MHz, Chloroform-*d*) δ 7.29 (t, *J* = 7.6 Hz, 2H), 7.25 (dd, *J* = 5.0, 1.4 Hz, 1H), 7.23 – 7.17 (m, 1H), 7.20 – 7.14 (m, 2H), 7.01 – 6.95 (m, 2H), 5.90 (t, *J* = 5.7 Hz, 1H), 4.68 (ddd, *J* = 15.3, 5.8, 0.8 Hz, 1H), 4.60 (ddd, *J* = 15.2, 5.6, 0.8 Hz, 1H), 2.68 (ddd, *J* = 14.8, 9.5, 5.7 Hz, 1H), 2.59 (ddd, *J* = 13.8, 9.3, 6.8 Hz, 1H), 2.26 – 2.17 (m, 1H), 2.10 – 2.01 (m, 1H), 1.74 (dddd, *J* = 13.5, 9.5, 6.8, 5.7 Hz, 1H), 1.21 (d, *J* = 6.9 Hz, 3H). **<sup>13</sup>C NMR** (151 MHz, CDCl<sub>3</sub>) δ 175.6, 141.7, 141.3, 128.43, 128.42, 126.9, 125.95, 125.92, 125.2, 40.7, 38.2, 35.7, 33.5, 18.0. **HRMS** (ESI) calculated for [C<sub>16</sub>H<sub>19</sub>NOS+H]<sup>+</sup> 274.1266, found 274.1268. **Chiral HPLC** (Daicel OJ-H, 95:5 hexanes:isopropanol): ee = 96%, es = 97%.

mAU

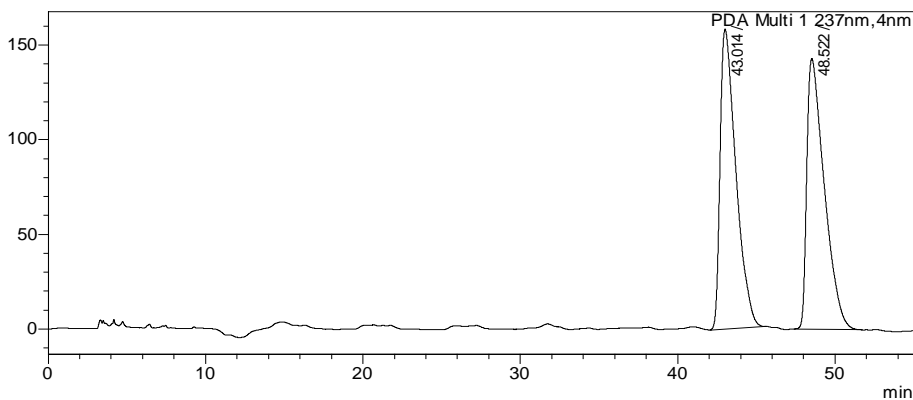

| Peak# | Ret. Time | Area     | Area% |
|-------|-----------|----------|-------|
| 1     | 43.014    | 11032049 | 49.96 |
| 2     | 48.522    | 11049670 | 50.04 |
| Total |           | 22081719 | 100   |

mAU

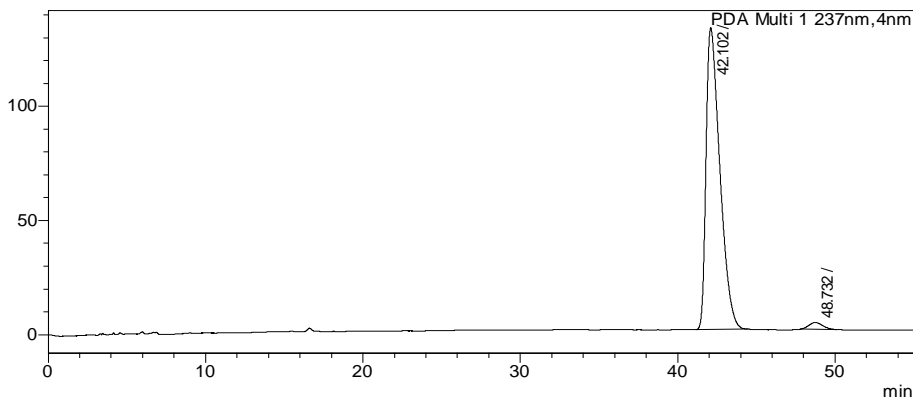

| Peak# | Ret. Time | Area    | Area%  |
|-------|-----------|---------|--------|
| 1     | 42.102    | 8044176 | 97.812 |

|       |        |         |       |
|-------|--------|---------|-------|
| 2     | 48.732 | 179955  | 2.188 |
| Total |        | 8224131 | 100   |

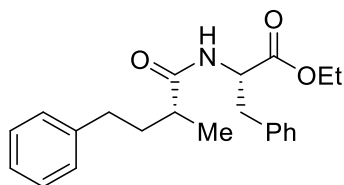

**Ethyl ((*R*)-2-methyl-4-phenylbutanoyl)-L-phenylalaninate (**29**)** was obtained from General Carbonylation Procedure A and the crude product was purified via flash chromatography using a gradient of 10-30% EtOAc/hexanes yielding **29** as a white solid (55 mg, 62%). Major diastereomer: **<sup>1</sup>H NMR** (600 MHz, Chloroform-*d*)  $\delta$  7.36 – 7.24 (m, 5H), 7.24 – 7.07 (m, 6H), 6.01 – 5.90 (m, 1H), 4.95 (dt, *J* = 7.9, 6.2 Hz, 1H), 4.21 (q, *J* = 7.1 Hz, 2H), 3.20 (dd, *J* = 14.0, 5.9 Hz, 1H), 3.16 – 3.07 (m, 1H), 2.70 – 2.46 (m, 2H), 2.27 – 2.16 (m, 1H), 1.98 (dddd, *J* = 14.0, 9.3, 8.3, 5.8 Hz, 1H), 1.74 – 1.61 (m, 2H), 1.34 – 1.22 (m, 4H), 1.16 (d, *J* = 6.9 Hz, 2H). **<sup>13</sup>C NMR** (151 MHz, CDCl<sub>3</sub>)  $\delta$  175.8, 171.9, 141.7, 136.0, 129.3, 128.6, 128.42, 128.40, 127.2, 125.9, 61.6, 52.8, 40.6, 38.1, 35.7, 33.4, 17.9, 14.2. **HRMS** (ESI) calculated for [C<sub>22</sub>H<sub>27</sub>NO<sub>3</sub>+H]<sup>+</sup> 354.2069, found 354.2053. **Chiral HPLC** (Daicel OJ-H, 95:5 hexanes:isopropanol): ee = 93%, es = 94%.

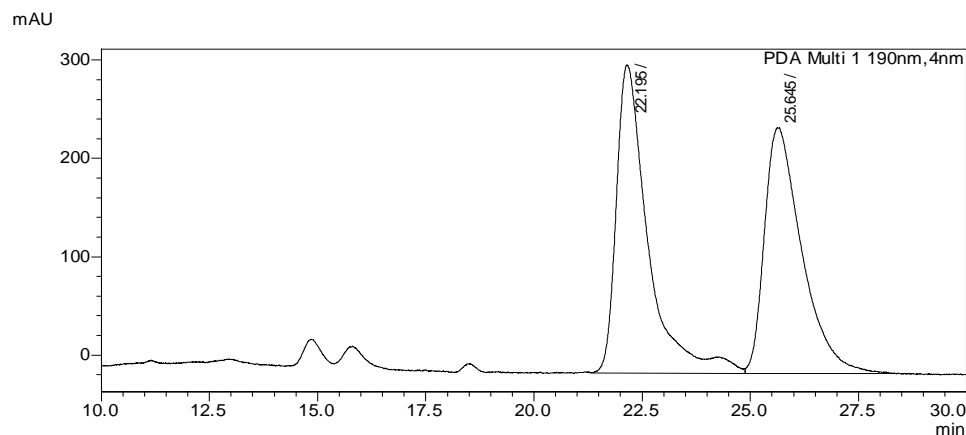

| Peak# | Ret. Time | Area     | Area%  |
|-------|-----------|----------|--------|
| 1     | 22.195    | 15991103 | 51.559 |
| 2     | 25.645    | 15024192 | 48.441 |
| Total |           | 31015294 | 100    |

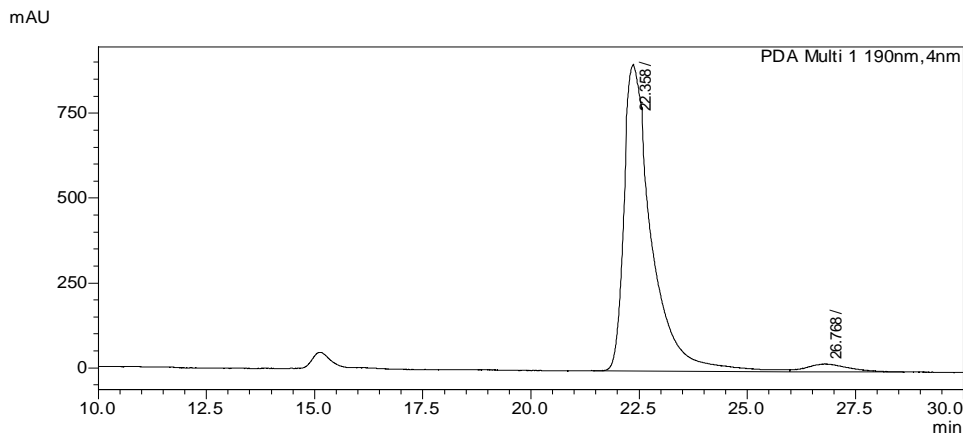

| Peak# | Ret. Time | Area     | Area%  |
|-------|-----------|----------|--------|
| 1     | 22.358    | 39991153 | 96.345 |
| 2     | 26.768    | 1517183  | 3.655  |
| Total |           | 41508336 | 100    |

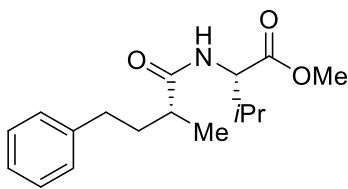

**Methyl ((*R*)-2-methyl-4-phenylbutanoyl)-L-valinate (**30**)** was obtained from General Carbonylation Procedure A and the crude product was purified via flash chromatography using a gradient of 10-20% EtOAc/hexanes yielding **30** as a white solid (48 mg, 66%). **<sup>1</sup>H NMR** (600 MHz, Chloroform-*d*)  $\delta$  7.30 (dd,  $J = 8.6, 6.7$  Hz, 2H), 7.21 (dd,  $J = 8.6, 7.0$  Hz, 3H), 6.00 (d,  $J = 8.8$  Hz, 1H), 4.64 (dd,  $J = 8.8, 4.8$  Hz, 1H), 3.76 (s, 3H), 2.69 (ddd,  $J = 13.9, 9.9, 5.7$  Hz, 1H), 2.66 – 2.57 (m, 1H), 2.36 – 2.26 (m, 1H), 2.26 – 2.15 (m, 1H), 2.11 – 2.00 (m, 1H), 1.73 (dddt,  $J = 16.7, 8.8, 6.3, 4.4$  Hz, 1H), 1.20 (d,  $J = 6.9$  Hz, 3H), 0.99 (d,  $J = 6.9$  Hz, 3H), 0.94 (d,  $J = 6.9$  Hz, 3H). **<sup>13</sup>C NMR** (151 MHz, CDCl<sub>3</sub>)  $\delta$  176.1, 172.8, 141.7, 128.42, 128.40, 126.0, 56.8, 52.2, 40.9, 35.9, 33.6, 31.3, 19.1, 17.93, 17.87. **HRMS** (ESI) calculated for [C<sub>17</sub>H<sub>25</sub>NO<sub>3</sub>+H]<sup>+</sup> 292.1913, found 292.1916. **Chiral HPLC** (Daicel OJ-H, 95:5 hexanes:isopropanol): ee = 95%, es = 96%.

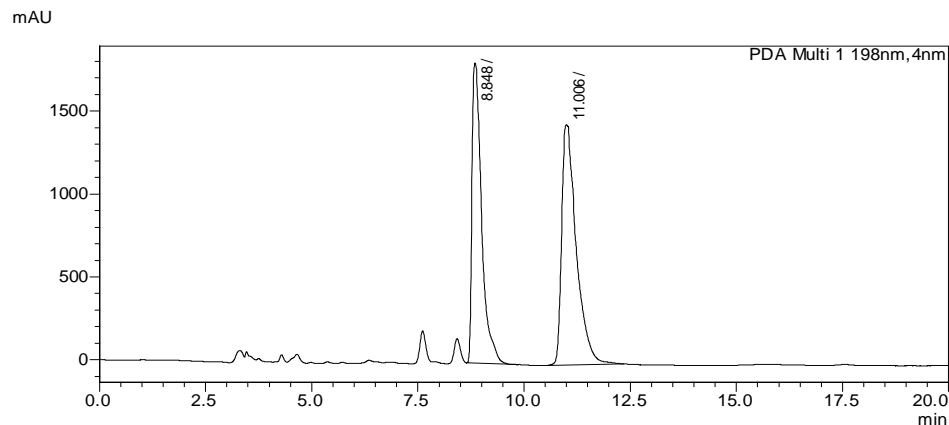

| Peak# | Ret. Time | Area     | Area%  |
|-------|-----------|----------|--------|
| 1     | 8.848     | 28583027 | 45.259 |
| 2     | 11.006    | 34570896 | 54.741 |
| Total |           | 63153922 | 100    |

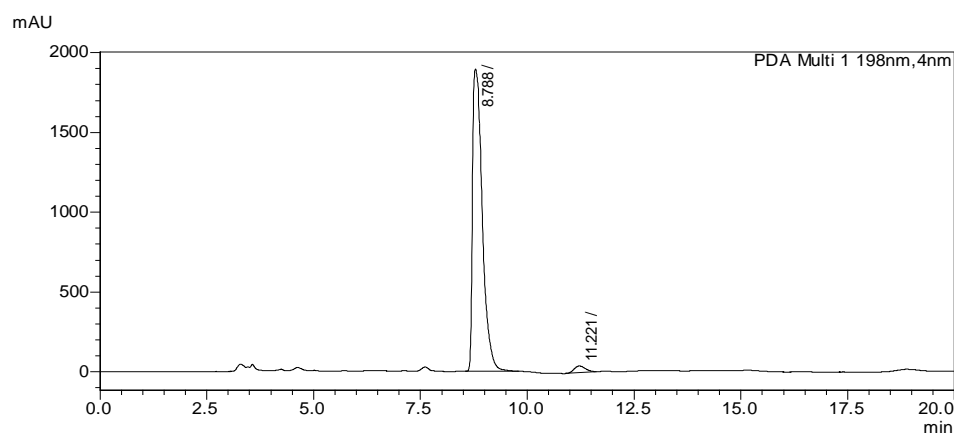

| Peak# | Ret. Time | Area     | Area%  |
|-------|-----------|----------|--------|
| 1     | 8.788     | 30136282 | 97.553 |
| 2     | 11.221    | 756043   | 2.447  |
| Total |           | 30892325 | 100    |

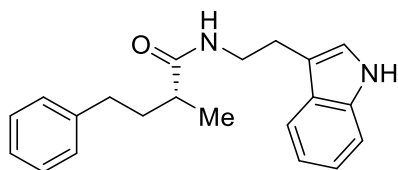

**(R)-N-(2-(1H-indol-3-yl)ethyl)-2-methyl-4-phenylbutanamide (31)** was obtained from General Carbonylation Procedure A and the crude product was purified via flash chromatography using a gradient of 30-75% EtOAc/hexanes yielding **31** as a viscous

yellow oil (49 mg, 61%). **<sup>1</sup>H NMR** (600 MHz, Chloroform-*d*) δ 8.39 (br s, 1H), 7.66 (dd, *J* = 7.9, 1.2 Hz, 1H), 7.41 (dt, *J* = 8.2, 0.9 Hz, 1H), 7.30 – 7.10 (m, 7H), 7.03 (d, *J* = 2.3 Hz, 1H), 5.58 (t, *J* = 5.9 Hz, 1H), 3.67 (tq, *J* = 13.1, 6.6 Hz, 2H), 3.06 – 2.98 (m, 2H), 2.63 (ddd, *J* = 14.8, 9.5, 5.7 Hz, 1H), 2.54 (ddd, *J* = 13.8, 9.2, 6.7 Hz, 1H), 2.15 – 2.06 (m, 1H), 2.05 – 1.96 (m, 1H), 1.68 (dddd, *J* = 13.4, 9.6, 6.7, 5.7 Hz, 1H), 1.16 (d, *J* = 6.8 Hz, 3H). **<sup>13</sup>C NMR** (151 MHz, CDCl<sub>3</sub>) δ 176.3, 141.8, 136.5, 128.4, 127.4, 125.9, 122.20, 122.17, 119.5, 118.7, 112.9, 111.4, 40.9, 39.6, 35.7, 33.5, 25.5, 18.1. **HRMS** (ESI) calculated for [C<sub>21</sub>H<sub>24</sub>N<sub>2</sub>O+H]<sup>+</sup> 321.1967, found 321.1971. **Chiral SFC** (Phenomenex Lux Cellulose-3, 60:40 CO<sub>2</sub>:methanol): ee = 94%, es = 95%.

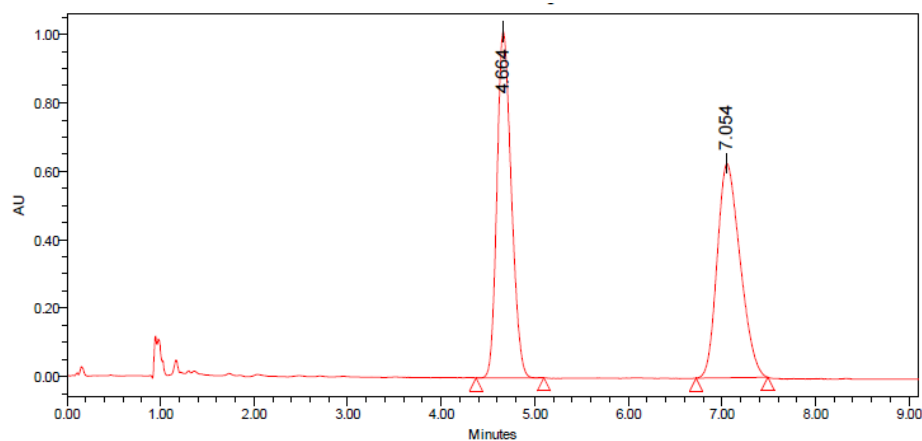

| Peak# | Ret. Time | Area% |
|-------|-----------|-------|
| 1     | 4.664     | 50.27 |
| 2     | 7.054     | 49.73 |
| Total |           | 100   |

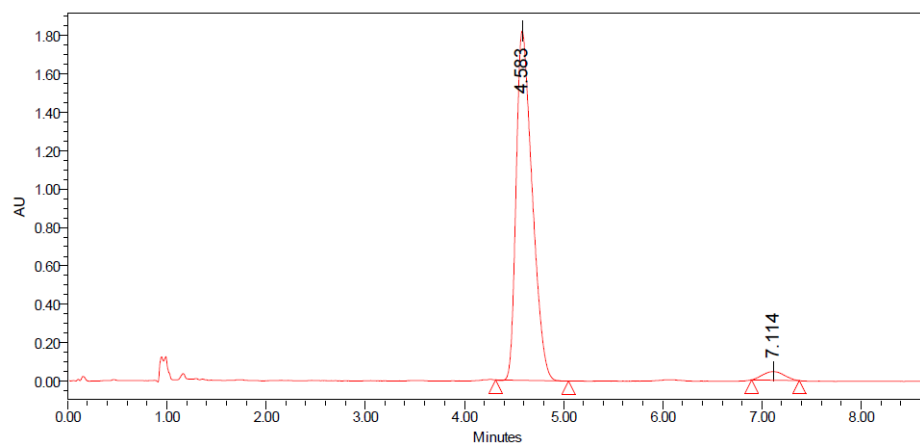

| Peak# | Ret. Time | Area% |
|-------|-----------|-------|
| 1     | 4.583     | 96.79 |

|       |   |       |      |
|-------|---|-------|------|
|       | 2 | 7.114 | 3.21 |
| Total |   |       | 100  |

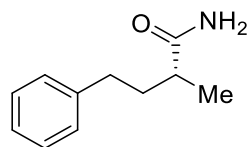

**(R)-2-methyl-4-phenylbutanamide (32)** was obtained from General Carbonylation Procedure A (using 1.3 equiv ammonium carbamate in place of the amine) and the crude product was purified via flash chromatography using a gradient of 30-75% EtOAc/hexanes yielding **32** as a white solid (36.4 mg, 82%). **<sup>1</sup>H NMR** (600 MHz, Chloroform-*d*)  $\delta$  7.33 – 7.28 (m, 2H), 7.24 – 7.19 (m, 3H), 5.87 (br s, 1H), 5.49 (br s, 1H), 2.71 (ddd,  $J = 15.0, 9.5, 5.9$  Hz, 1H), 2.65 (ddd,  $J = 13.9, 9.3, 6.7$  Hz, 1H), 2.29 (dt,  $J = 8.2, 6.5$  Hz, 1H), 2.03 (dddd,  $J = 13.9, 9.3, 8.2, 5.9$  Hz, 1H), 1.74 (ddt,  $J = 13.1, 9.5, 6.4$  Hz, 1H), 1.22 (d,  $J = 6.9$  Hz, 3H). **<sup>13</sup>C NMR** (151 MHz, CDCl<sub>3</sub>)  $\delta$  178.9, 141.7, 128.4, 126.0, 40.0, 35.7, 33.5, 18.0. **HRMS** (ESI) calculated for [C<sub>11</sub>H<sub>15</sub>NO+H]<sup>+</sup> 178.1232, found 178.1234. **Chiral HPLC** (Daicel OJ-H, 95:5 hexanes:isopropanol): ee = 97%, es = 98%.

mAU

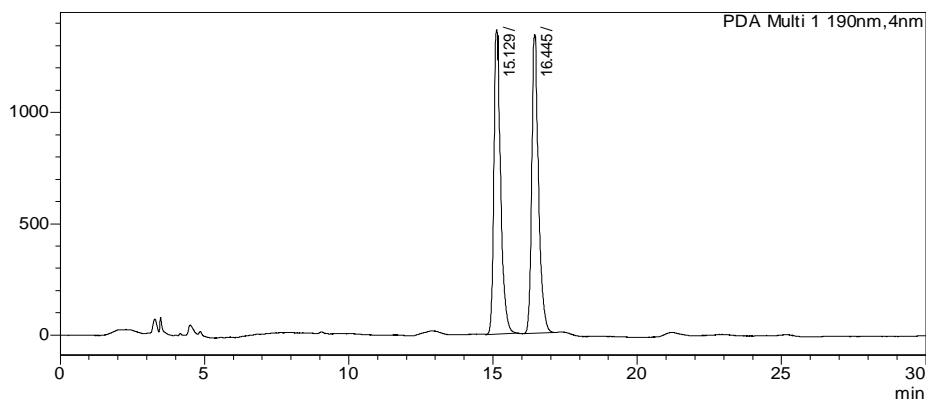

| Peak# | Ret. Time | Area     | Area%  |
|-------|-----------|----------|--------|
| 1     | 15.129    | 22129938 | 50.277 |
| 2     | 16.445    | 21885968 | 49.723 |
| Total |           | 44015906 | 100    |



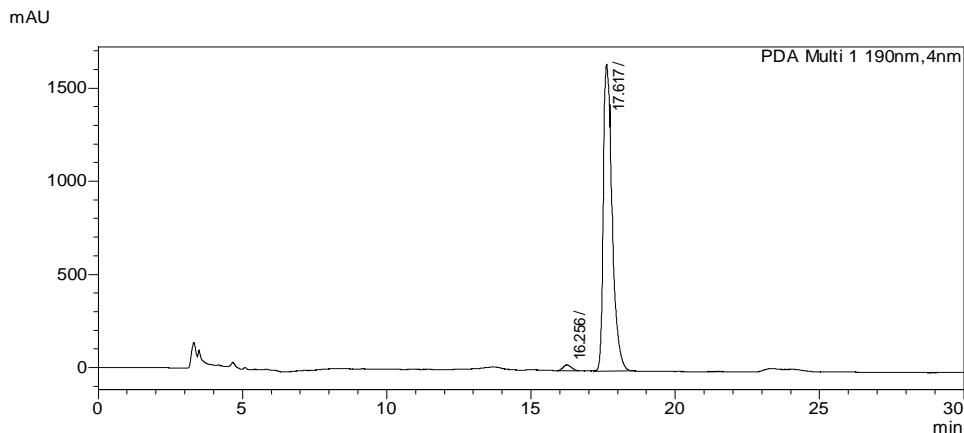

| Peak# | Ret. Time | Area     | Area% |
|-------|-----------|----------|-------|
| 1     | 16.256    | 597088   | 1.68  |
| 2     | 17.617    | 34942891 | 98.32 |
| Total |           | 35539979 | 100   |

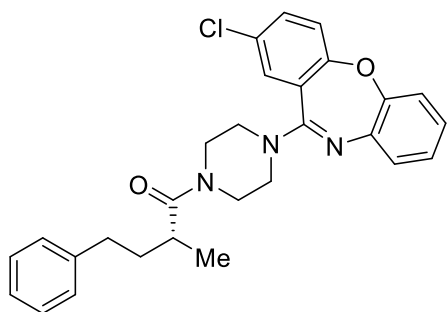

**(R)-1-(4-(2-chlorodibenzo[b,f][1,4]oxazepin-11-yl)piperazin-1-yl)-2-methyl-4-phenylbutan-1-one (37)** was obtained from General Carbonylation Procedure A and the crude product was purified via flash chromatography using a gradient of 10-50% EtOAc/hexanes yielding **37** as a cream colored, waxy solid (51 mg, 43%). **<sup>1</sup>H NMR** (600 MHz, Chloroform-*d*) δ 7.44 (dd, *J* = 8.7, 2.6 Hz, 1H), 7.36 – 7.27 (m, 3H), 7.25 – 7.16 (m, 5H), 7.16 – 7.10 (m, 2H), 7.05 (td, *J* = 7.6, 1.7 Hz, 1H), 3.79 (s, 2H), 3.52 (s, 6H), 2.70 (ddt, *J* = 12.1, 8.6, 4.6 Hz, 2H), 2.63 (dt, *J* = 14.1, 7.6 Hz, 1H), 2.16 – 2.06 (m, 1H), 1.74 (ddt, *J* = 13.2, 8.5, 6.6 Hz, 1H), 1.19 (d, *J* = 6.7 Hz, 3H). **<sup>13</sup>C NMR** (151 MHz, CDCl<sub>3</sub>) δ 174.9, 159.4, 158.8, 151.8, 141.8, 139.8, 132.9, 130.5, 128.9, 128.5, 128.5, 127.1, 126.0, 125.9, 125.0, 124.8, 122.9, 120.2, 47.9 (br), 47.5 (br), 45.0, 41.5, 35.4, 34.3, 33.4, 17.7. **HRMS** (ESI) calculated for [C<sub>28</sub>H<sub>29</sub>ClN<sub>3</sub>O<sub>2</sub>+H]<sup>+</sup> 474.1948, found 474.1954. **Chiral SFC** (Phenomenex Lux Cellulose-3, 80:20 CO<sub>2</sub>:methanol): ee = 94%, es = 95%.

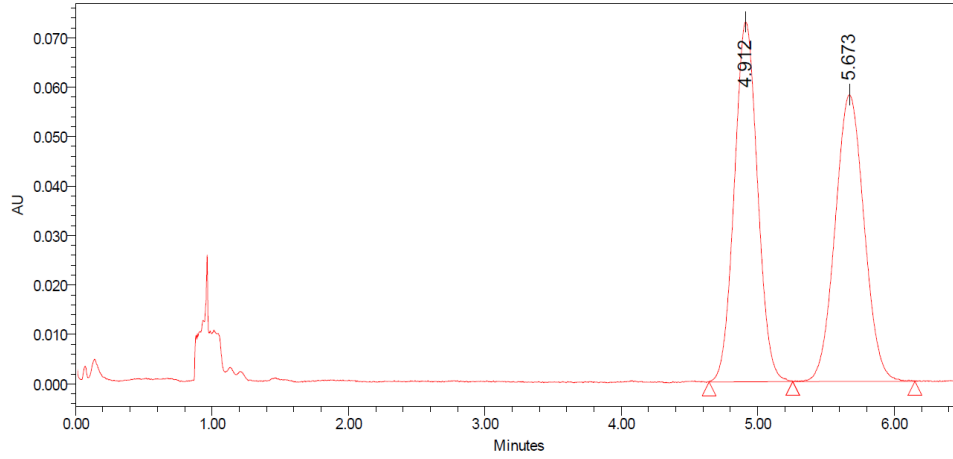

| Peak# | Ret. Time | Area% |
|-------|-----------|-------|
| 1     | 4.912     | 50.07 |
| 2     | 5.673     | 49.93 |
| Total |           | 100   |

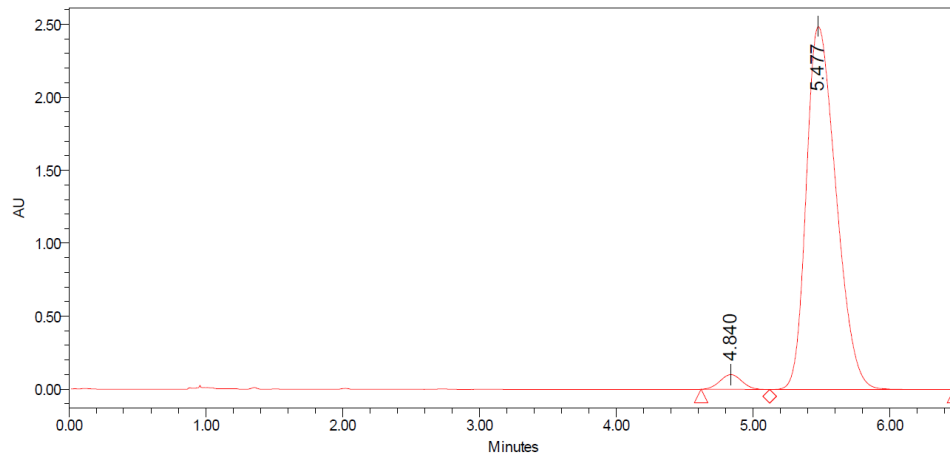

| Peak# | Ret. Time | Area% |
|-------|-----------|-------|
| 1     | 4.84      | 2.89  |
| 2     | 5.477     | 97.11 |
| Total |           | 100   |

## Post-Reaction Transformations

### One-Pot Stereospecific Synthesis of Carboxylic Acids

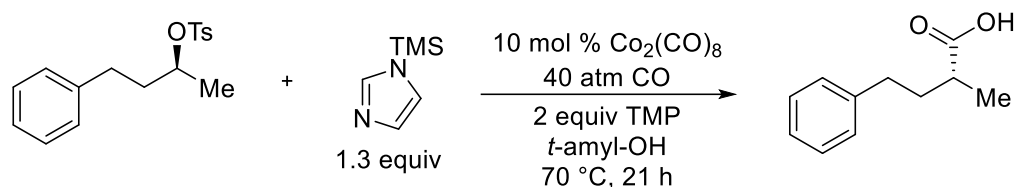

**(R)-2-methyl-4-phenylbutanoic acid (34)** was obtained from General Carbonylation Procedure A (21 h) with 1-(trimethylsilyl)imidazole (1.3 equiv) as the coupling partner. Hydrolysis to the carboxylic acid was accomplished by stirring the crude reaction mixture open to air with 1 M HCl for 20 minutes at room temperature, then worked up as described in General Carbonylation Procedure A. The crude product was purified via flash chromatography using a gradient of 10-30% EtOAc/hexanes with 0.1% AcOH yielding **34** as a yellow oil (36 mg, 81%). Physical and spectral data were in accordance with literature data.<sup>[13]</sup> **Chiral HPLC** (Daicel OJ-H, 95:5 hexanes:isopropanol): ee = 93%, es = 94%.

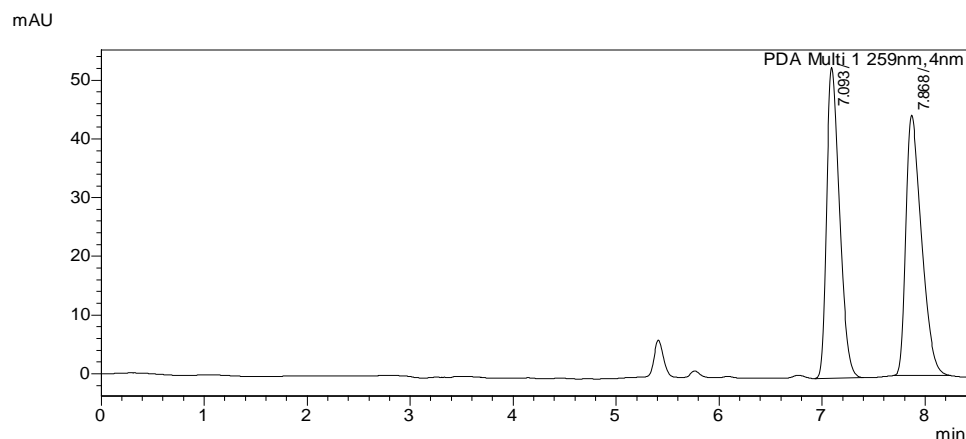

| Peak# | Ret. Time | Area   | Area%  |
|-------|-----------|--------|--------|
| 1     | 7.093     | 460958 | 49.633 |
| 2     | 7.868     | 467767 | 50.367 |
| Total |           | 928725 | 100    |

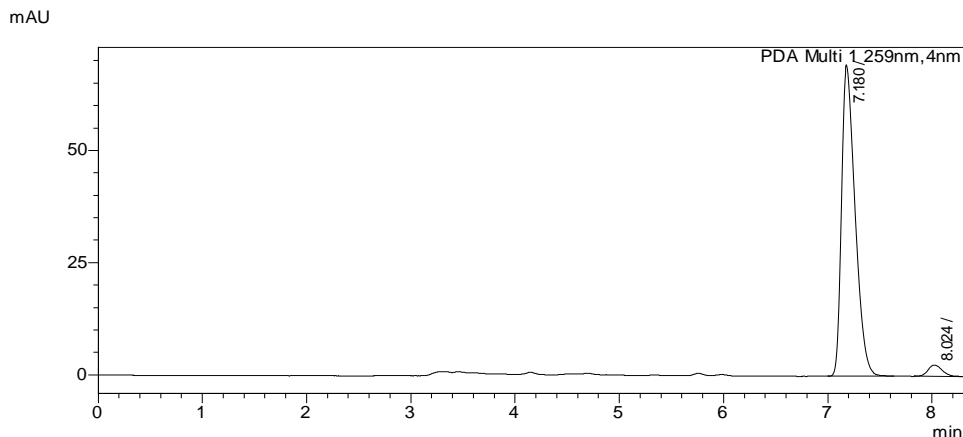

| Peak# | Ret. Time | Area   | Area% |
|-------|-----------|--------|-------|
| 1     | 7.18      | 634510 | 96.36 |
| 2     | 8.024     | 23971  | 3.64  |
| Total |           | 658481 | 100   |

### Organometallic Reagent Addition for Asymmetric Chiral Ketone Synthesis:

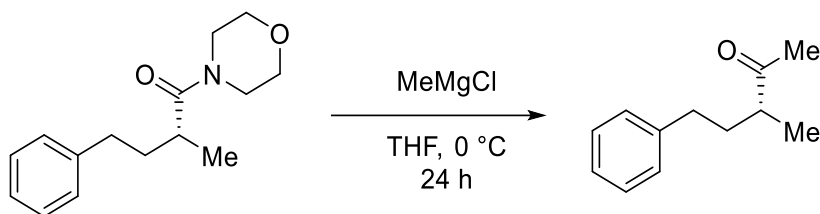

**(R)-3-methyl-5-phenylpentan-2-one (35)** was prepared using a modified procedure from Vilarrasa and co-workers.<sup>[14]</sup> To a 0 °C cryobath cooled solution of amide **3** (62 mg, 0.25 mmol, 90% ee, synthesized below) in THF (2.5 mL) was added methylmagnesium chloride (0.5 mL, 1.5 mmol, 3.0 M). The reaction mixture was stirred at 0 °C in a cryobath for 24 hours. Upon completion of the reaction, the mixture was quenched, still at 0 °C, with a saturated solution of NH<sub>4</sub>Cl and extracted 3 times with DCM. The organic layers were combined, dried over MgSO<sub>4</sub>, filtered, and concentrated under reduced pressure. The crude product was purified via flash chromatography in 5% EtOAc/hexanes yielding **35** as a yellow oil (40 mg, 91%). Physical and spectral data were in accordance with literature data.<sup>[15]</sup> **Chiral HPLC** (Daicel OJ-H, 95:5 hexanes:isopropanol): ee = 88%, es = 98%.

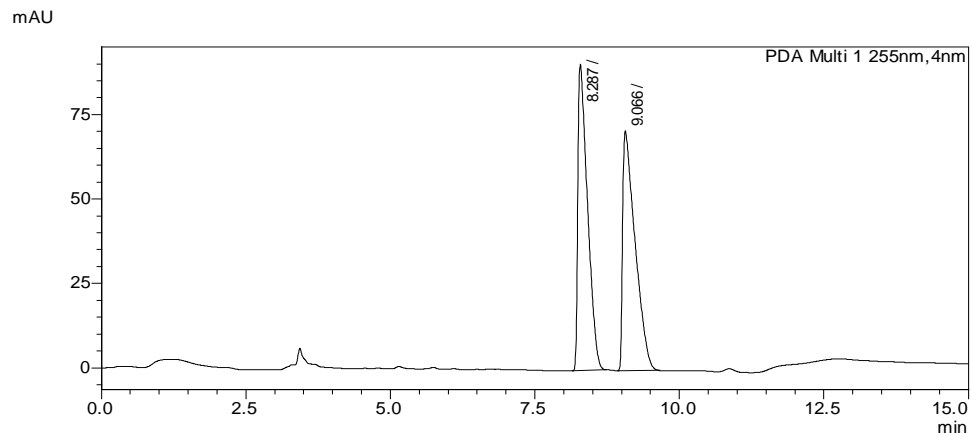

| Peak# | Ret. Time | Area    | Area%  |
|-------|-----------|---------|--------|
| 1     | 8.287     | 1082319 | 49.812 |
| 2     | 9.066     | 1090471 | 50.188 |
| Total |           | 2172790 | 100    |

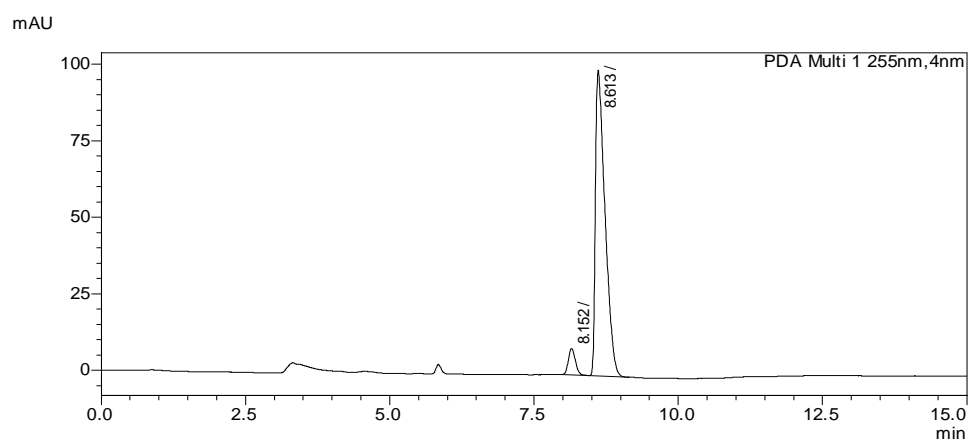

| Peak# | Ret. Time | Area    | Area%  |
|-------|-----------|---------|--------|
| 1     | 8.152     | 72791   | 5.925  |
| 2     | 8.613     | 1155803 | 94.075 |
| Total |           | 1228595 | 100    |

### Competitive Alkylation of Morpholine:

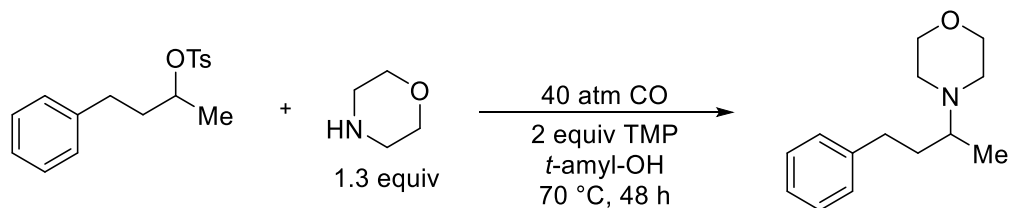

**4-(4-phenylbutan-2-yl)morpholine (38)** was obtained from General Carbonylation Procedure A (without any cobalt carbonyl added, 45% conversion), substituting the aqueous wash with 1 M NaOH, and the crude product was purified via flash chromatography using a gradient of 10-75% EtOAc/hexanes yielding **38** as a colorless oil (20 mg, 36%). **<sup>1</sup>H NMR** (600 MHz, Chloroform-*d*)  $\delta$  7.31 (t,  $J = 7.6$  Hz, 2H), 7.25 – 7.18 (m, 3H), 3.79 – 3.70 (m, 4H), 2.76 – 2.63 (m, 2H), 2.63 – 2.51 (m, 3H), 2.48 (ddd,  $J = 11.4, 6.0, 3.3$  Hz, 2H), 1.88 (ddt,  $J = 13.4, 9.7, 6.1$  Hz, 1H), 1.60 (ddt,  $J = 13.6, 9.6, 6.9$  Hz, 1H), 1.04 (d,  $J = 6.6$  Hz, 3H). **<sup>13</sup>C NMR** (151 MHz, CDCl<sub>3</sub>)  $\delta$  142.7, 128.5, 128.3, 125.7, 67.5, 58.4, 48.7, 35.3, 32.8, 13.9. **HRMS** (ESI) calculated for [C<sub>14</sub>H<sub>21</sub>NO+H]<sup>+</sup> 220.1701, found 220.1693.

## Mechanistic Experiments

**Absolute Stereochemistry Determination:** An independent HPLC standard of morpholine amide **3** was independently synthesized, using the chiral auxiliary route shown below, to prove that the carbonylation proceeds via inversion. This suggests an  $S_N2$  oxidative addition is operative in the reaction mechanism.

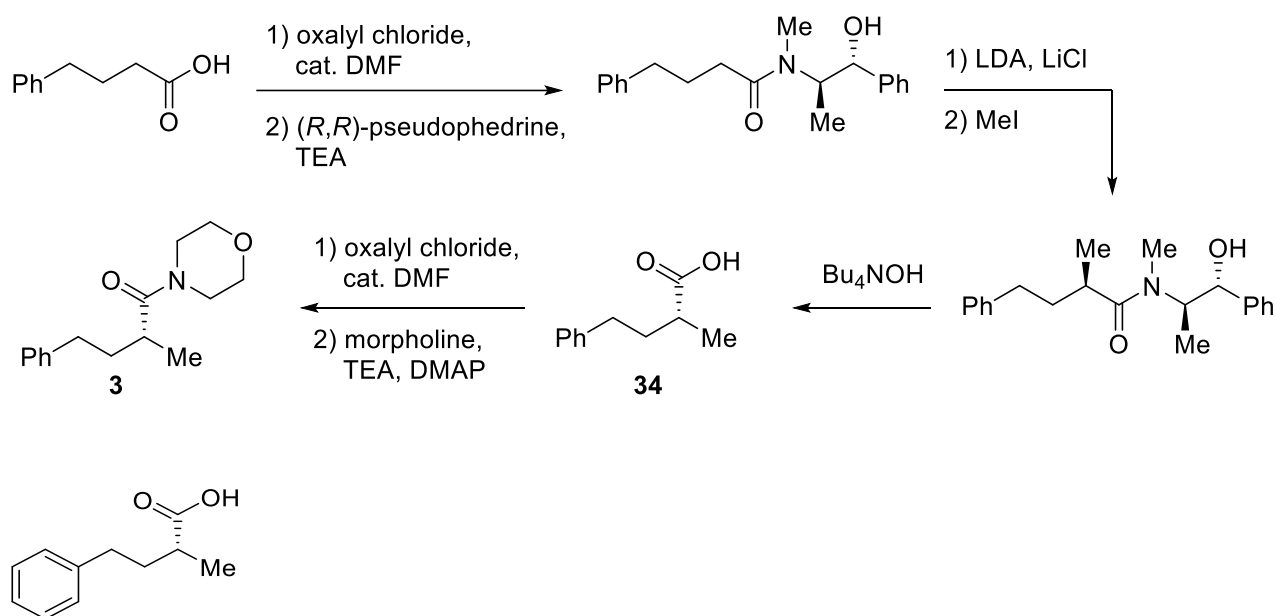

(R)-2-methyl-4-phenylbutanoic acid (**34**) was prepared according to a published procedure and used without further purification.<sup>[5]</sup>

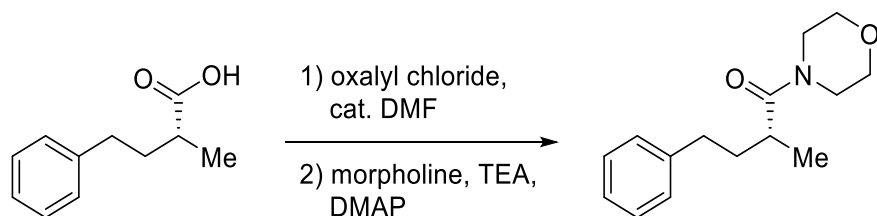

(R)-2-methyl-1-morpholino-4-phenylbutan-1-one (**3**) was synthesized by adding a few drops of DMF to a solution of **34** (0.40 g, 2.2 mmol) in DCM (8 mL) at 0 °C. To this stirred solution was added oxalyl chloride (0.38 mL, 4.5 mmol) dropwise. The reaction was stirred at 0 °C for 15 minutes and warmed to room temperature for 30 minutes. Solvent and excess oxalyl chloride were removed under reduced pressure and the mixture was brought up in DCM (2 mL). This solution was added dropwise to a stirred solution of

morpholine (0.17 mL, 2.0 mmol), DMAP (24 mg, 0.20 mmol), and TEA (0.36 mL, 2.6 mmol) in DCM (4 mL) at 0 °C for 10 minutes. The reaction was then warmed to room temperature for 45 minutes and quenched with water. The organic layer was separated and washed twice with brine, once with a saturated solution of NaHCO<sub>3</sub>, dried over MgSO<sub>4</sub>, filtered, and concentrated under reduced pressure. The crude product was purified via flash chromatography in 40% EtOAc/hexanes to provide 0.47 g (95%) of **3** as a colorless oil. **Chiral HPLC** (Daicel OJ-H, 90:10 hexanes:isopropanol): ee = 90%.

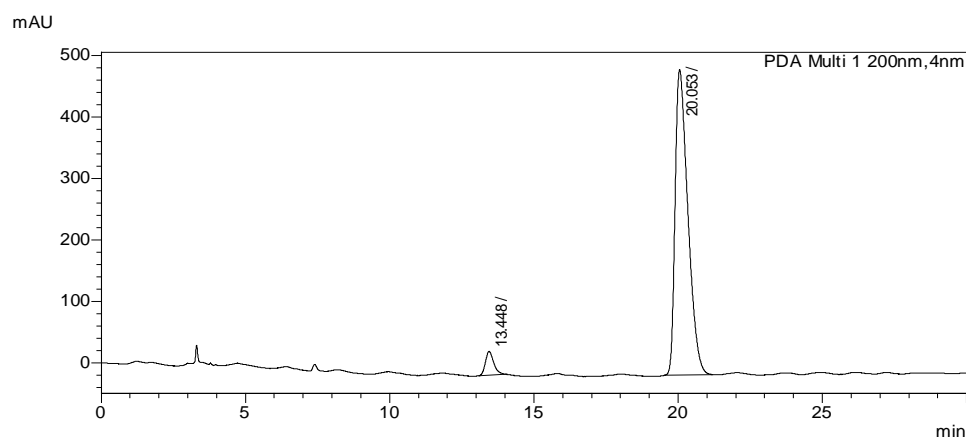

| Peak# | Ret. Time | Area     | Area%  |
|-------|-----------|----------|--------|
| 1     | 13.448    | 779154   | 4.866  |
| 2     | 20.053    | 15233092 | 95.134 |
| Total |           | 16012246 | 100    |

### Low Pressure Aminocarbonylations:

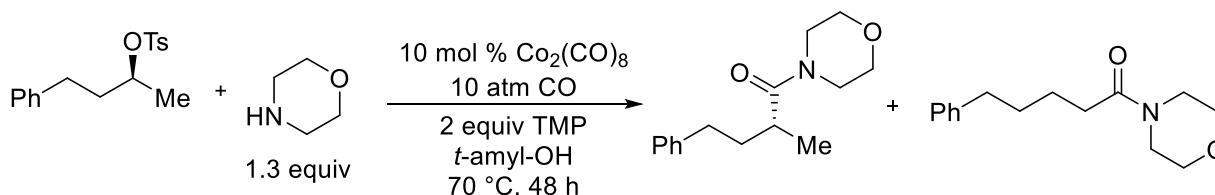

**1-Morpholino-5-phenylpentan-1-one (SI-28)** was observed in General Carbonylation Procedure A at lower pressures (using 10 atm, 45% NMR yield secondary amide, 11% primary amide). Physical and spectral data for **SI-28** were in accordance with literature data.<sup>[16]</sup>



## References:

- [1] J. E. Ellis, P. T. Barger, M. L. Winzenburg, G. F. Warnock, *J. Organomet. Chem.* **1990**, *383*, 521–530.
- [2] Y. Yoshida, Y. Sakakura, N. Aso, S. Okada, Y. Tanabe, *Tetrahedron* **1999**, *55*, 2183–2192.
- [3] S. D. Lepore, Y. He, *J. Org. Chem.* **2003**, *68*, 8261–8263.
- [4] D. Martinez-Solorio, M. P. Jennings, *Tetrahedron Lett.* **2008**, *49*, 5175–5178.
- [5] B. T. Sargent, E. J. Alexanian, *J. Am. Chem. Soc.* **2017**, *139*, 12438–12440.
- [6] J. E. Roque Peña, E. J. Alexanian, *Org. Lett.* **2017**, *19*, 4413–4415.
- [7] G. Bastug, S. Dierick, F. Lebreux, I. E. Markó, *Org. Lett.* **2012**, *14*, 1306–1309.
- [8] V. Rawat, P. V. Chouthaiwale, G. Suryavanshi, A. Sudalai, *Tetrahedron Asymmetry* **2009**, *20*, 2173–2177.
- [9] X.-H. Yang, K. Wang, S.-F. Zhu, J.-H. Xie, Q.-L. Zhou, *J. Am. Chem. Soc.* **2014**, *136*, 17426–17429.
- [10] B. Srinivas, D. S. Reddy, N. A. Mallampudi, D. K. Mohapatra, *Org. Lett.* **2018**, *20*, 6910–6914.
- [11] Z. Liu, B. Breit, *Angew. Chem. Int. Ed.* **2016**, *55*, 8440–8443.
- [12] S. A. Cochrane, C. T. Lohans, M. J. van Belkum, M. A. Bels, J. C. Vederas, *Org. Biomol. Chem.* **2015**, *13*, 6073–6081.
- [13] M. Gaydou, T. Moragas, F. Juliá-Hernández, R. Martín, *J. Am. Chem. Soc.* **2017**, *139*, 12161–12164.
- [14] R. Martín, P. Romea, C. Tey, F. Urpí, J. Vilarrasa, *Synlett* **1997**, *12*, 1414–1416.
- [15] S. D. Holmbo, N. A. Godfrey, J. J. Hirner, S. V. Pronin, *J. Am. Chem. Soc.* **2016**, *138*, 12316–12319.
- [16] N. Deibl, R. Kempe, *J. Am. Chem. Soc.* **2016**, *138*, 10786–10789.

# <sup>1</sup>H and <sup>13</sup>C NMR Spectra

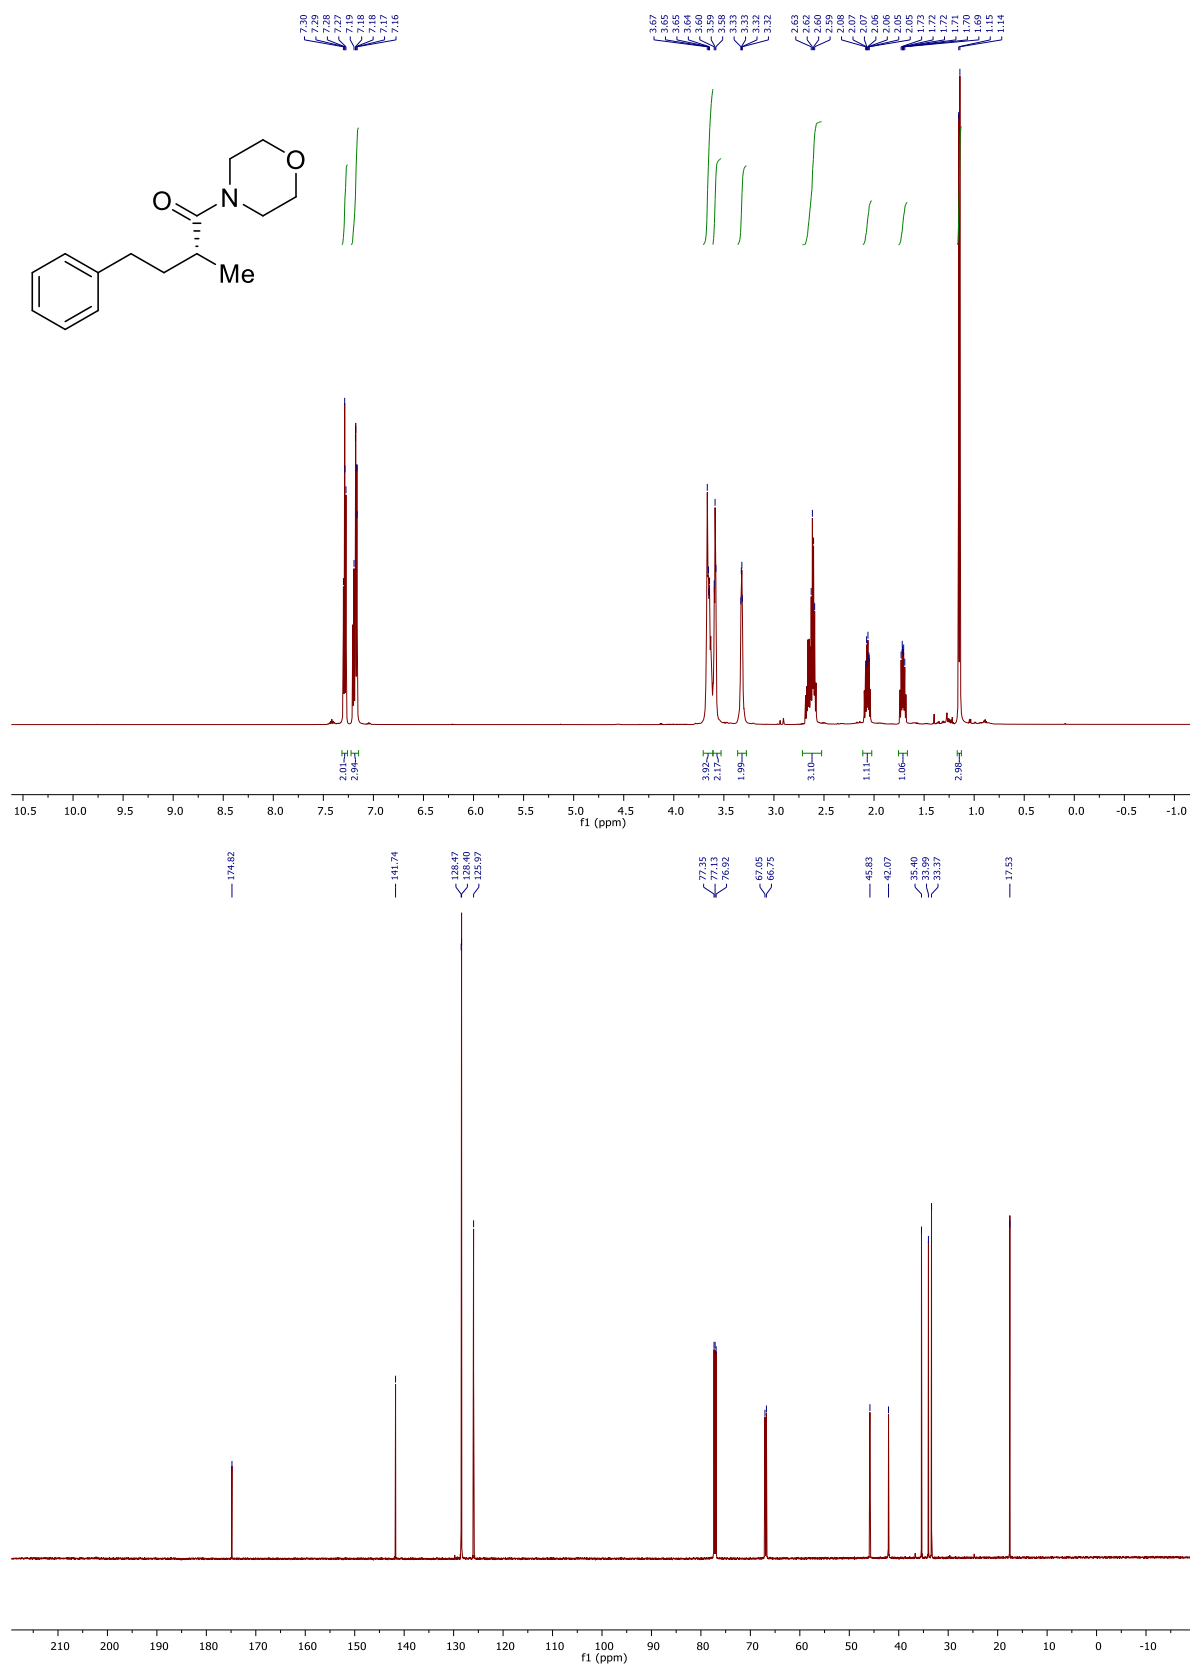

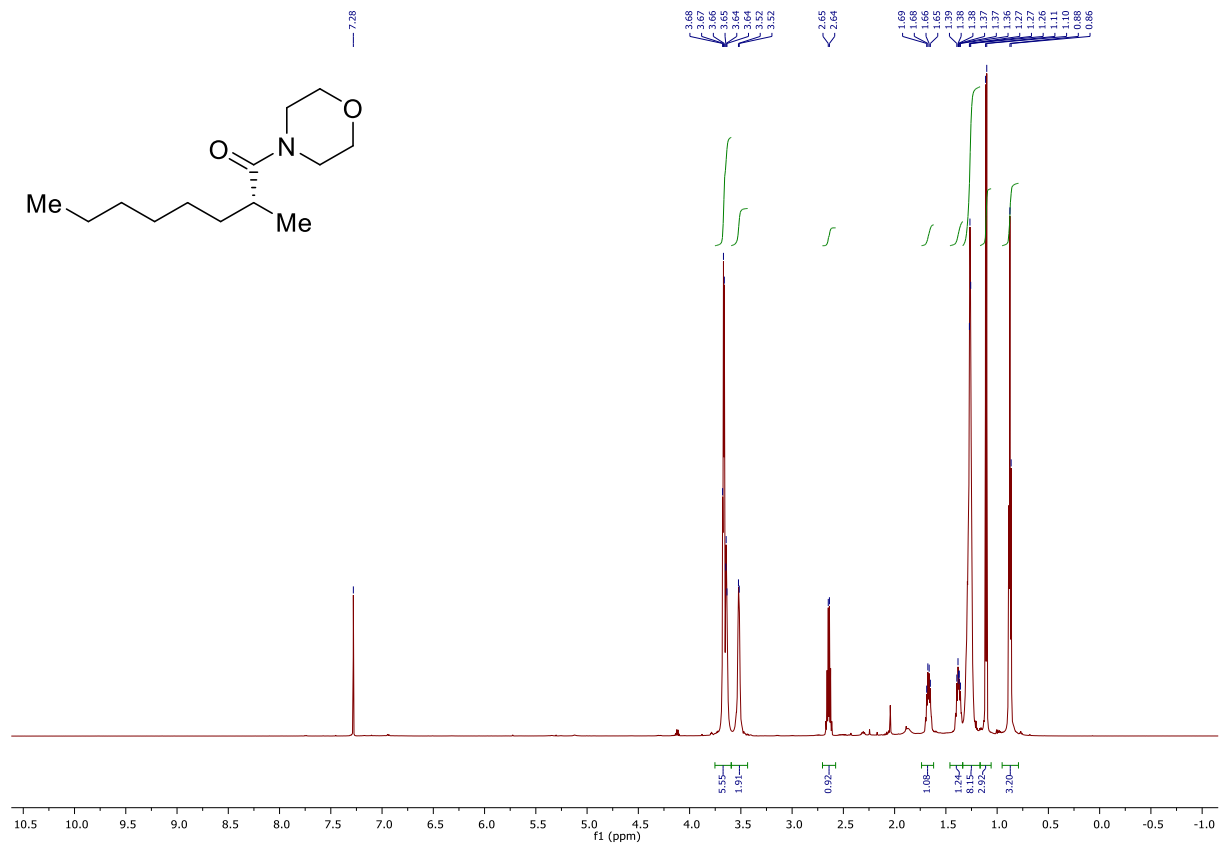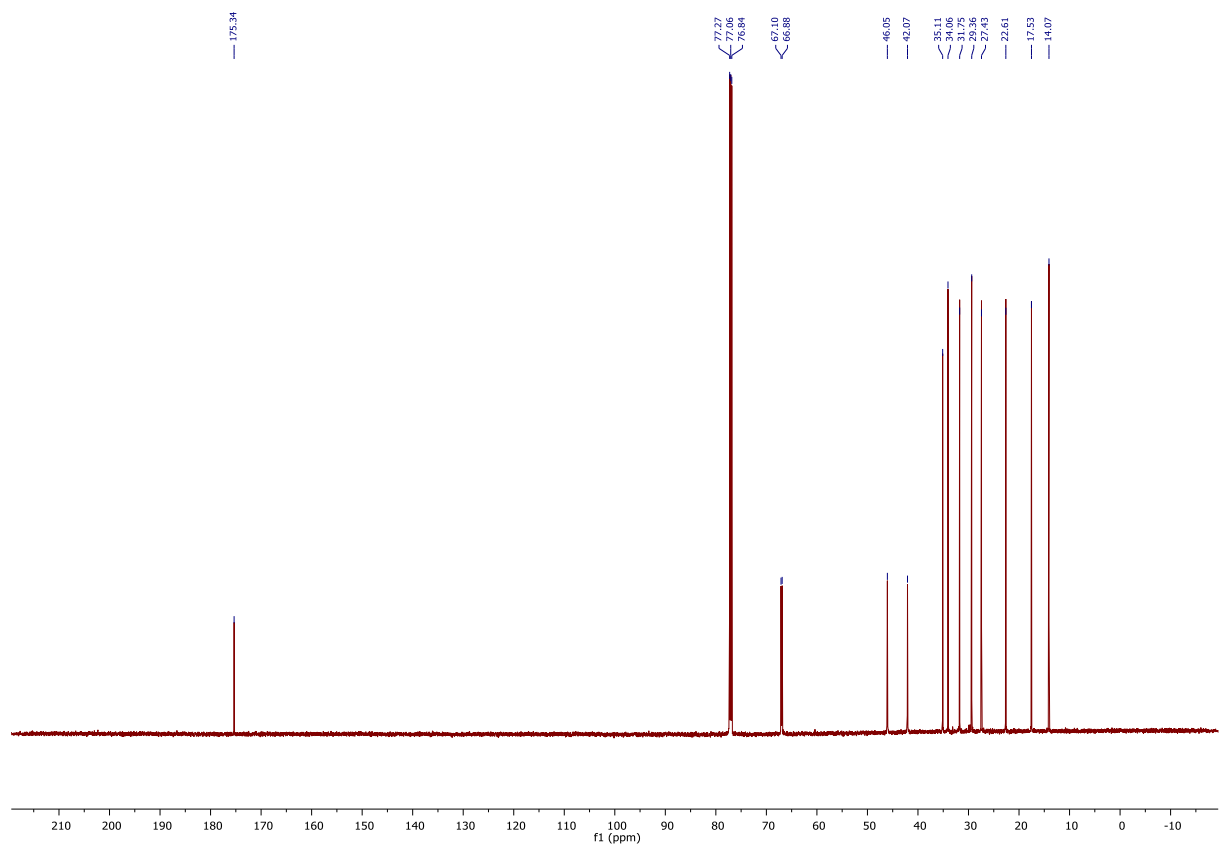

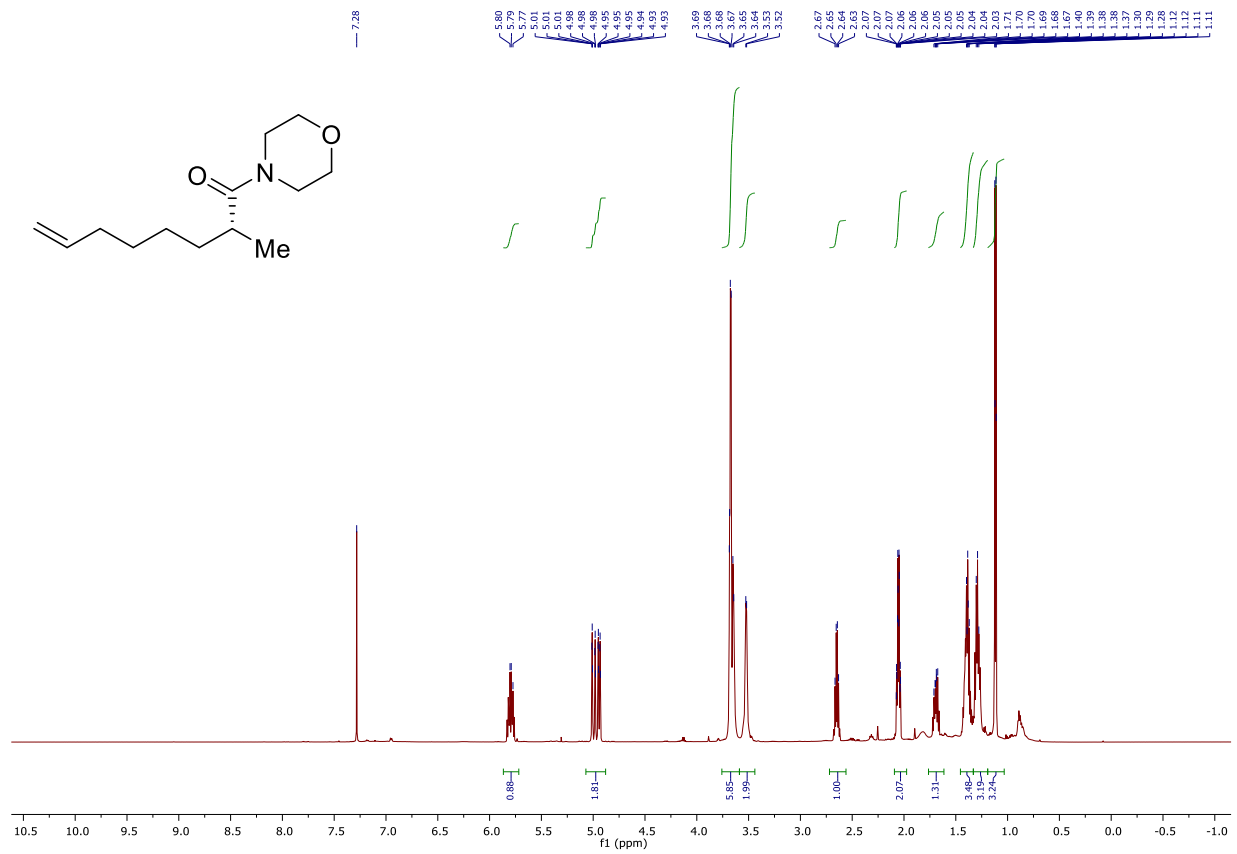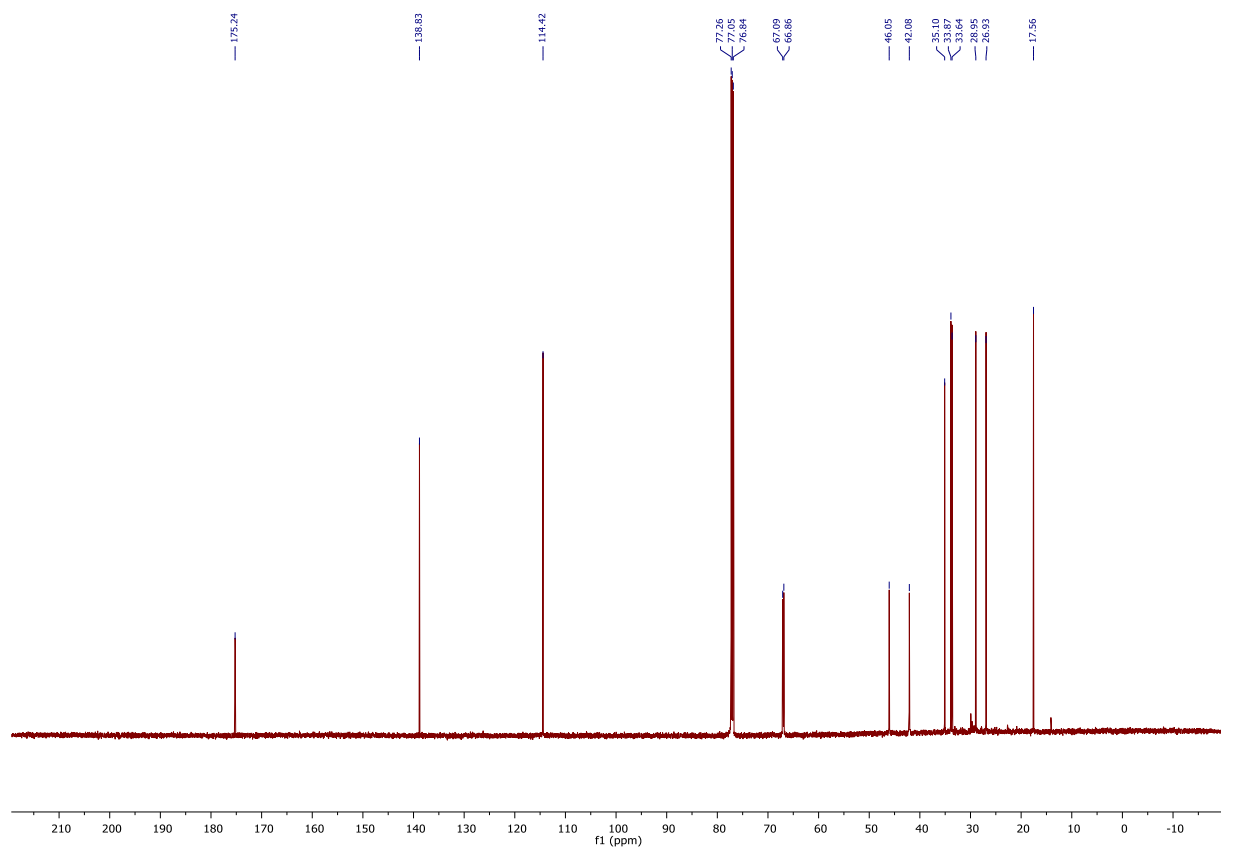

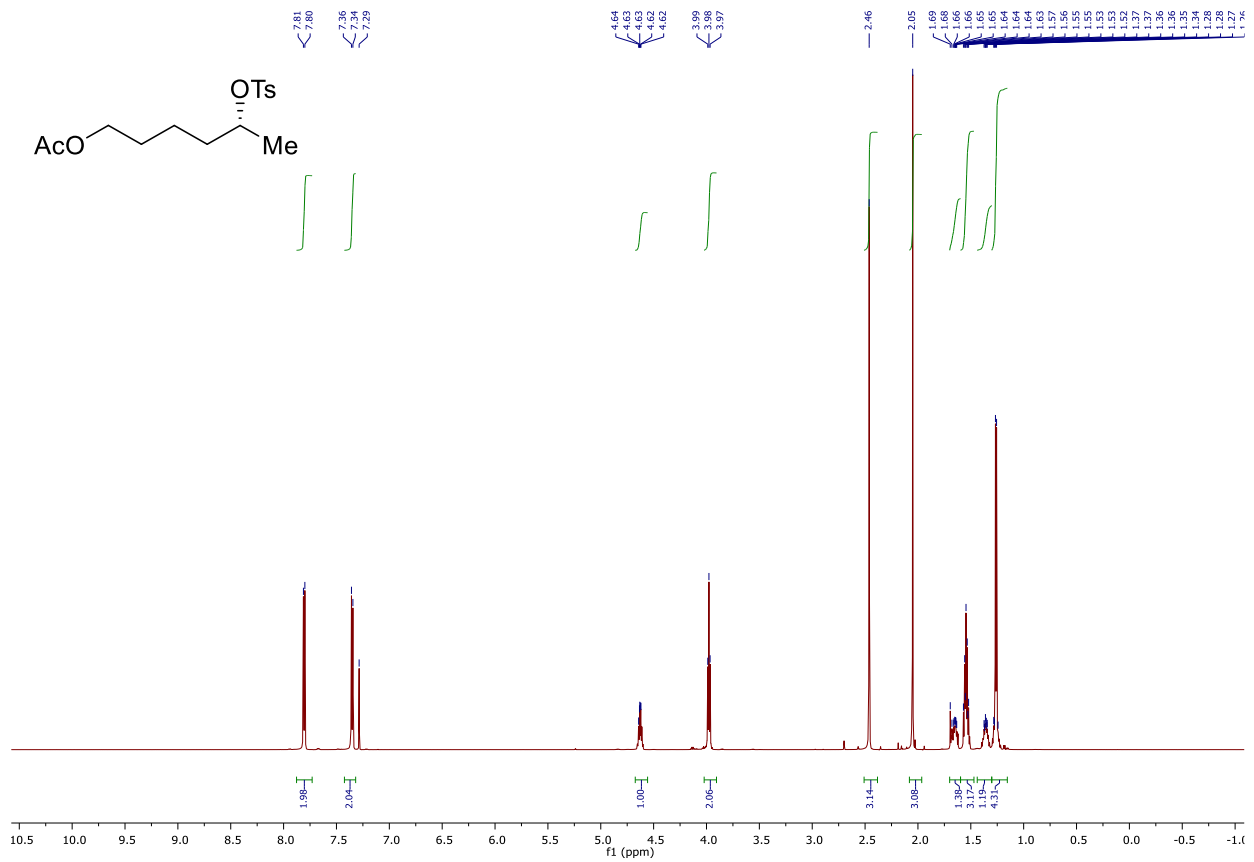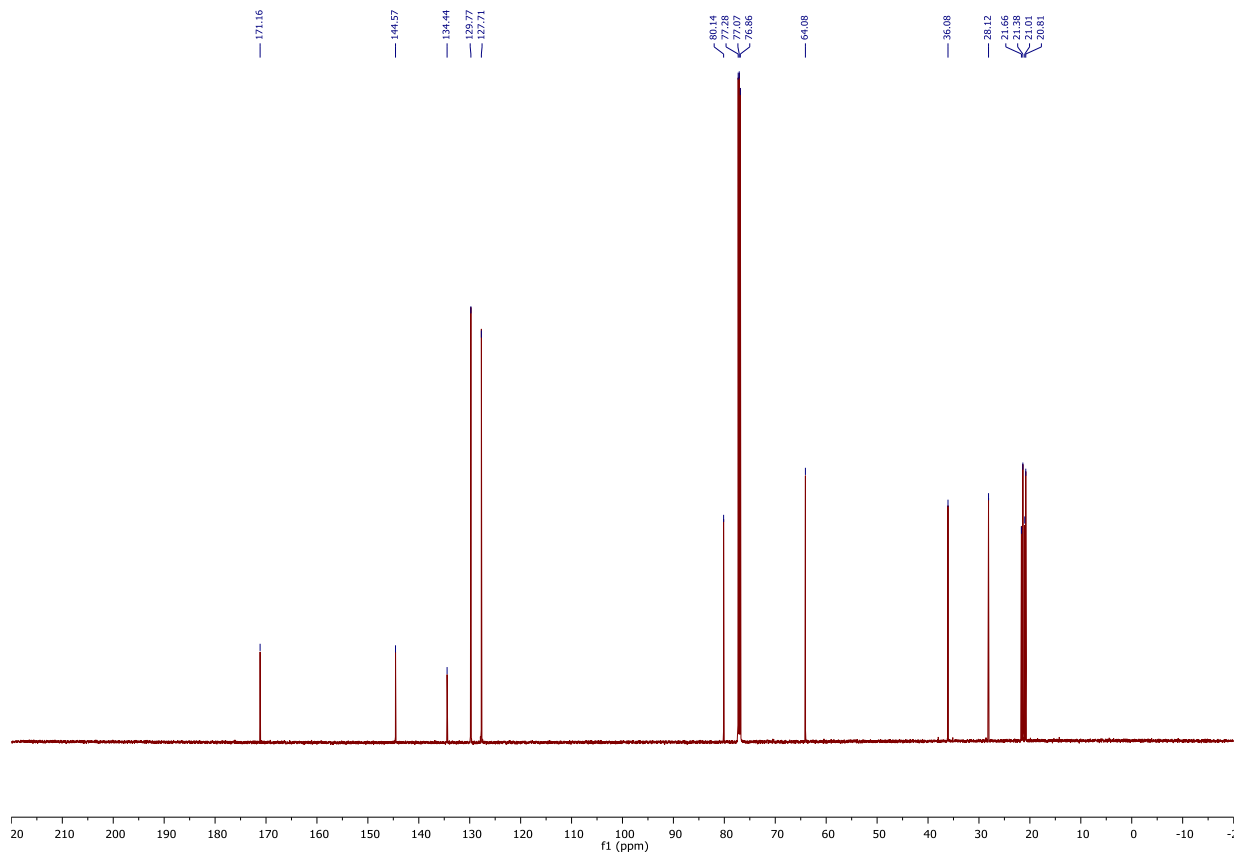

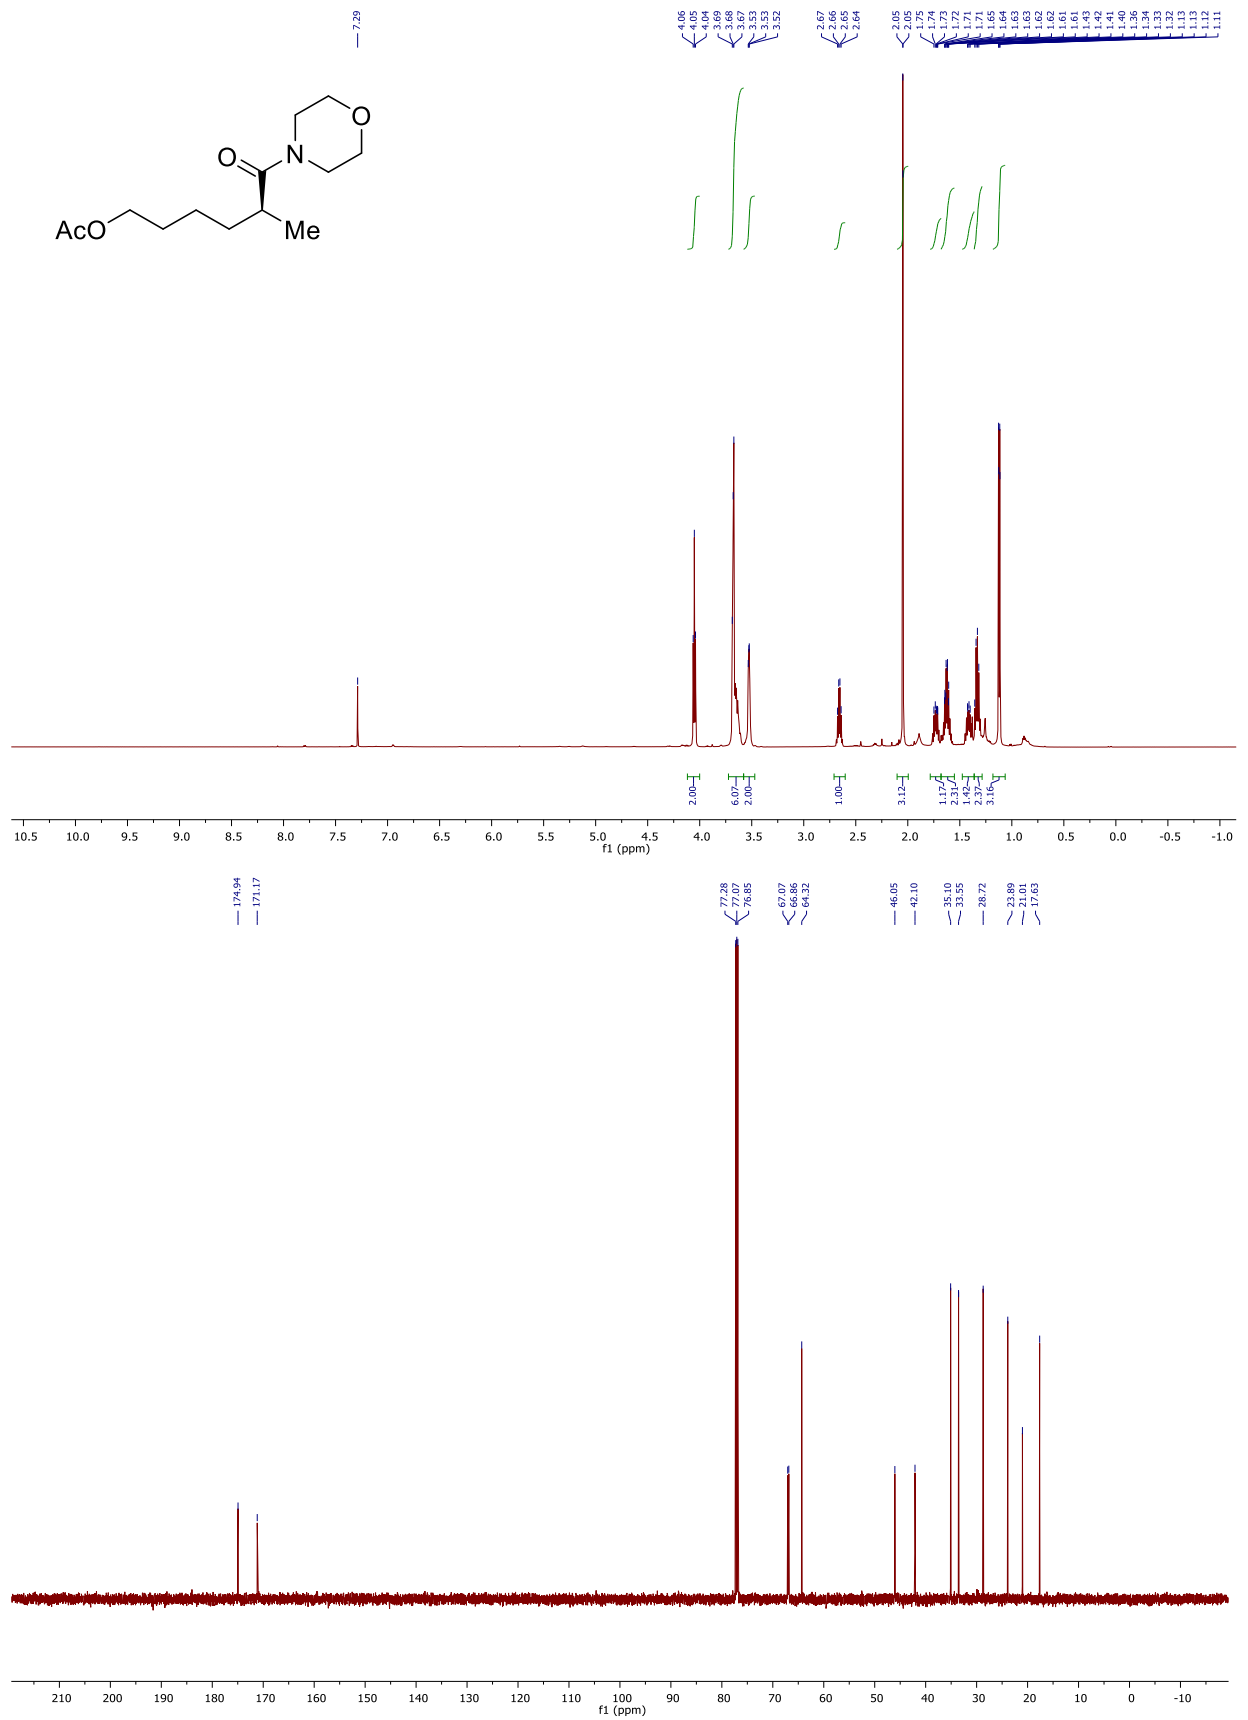

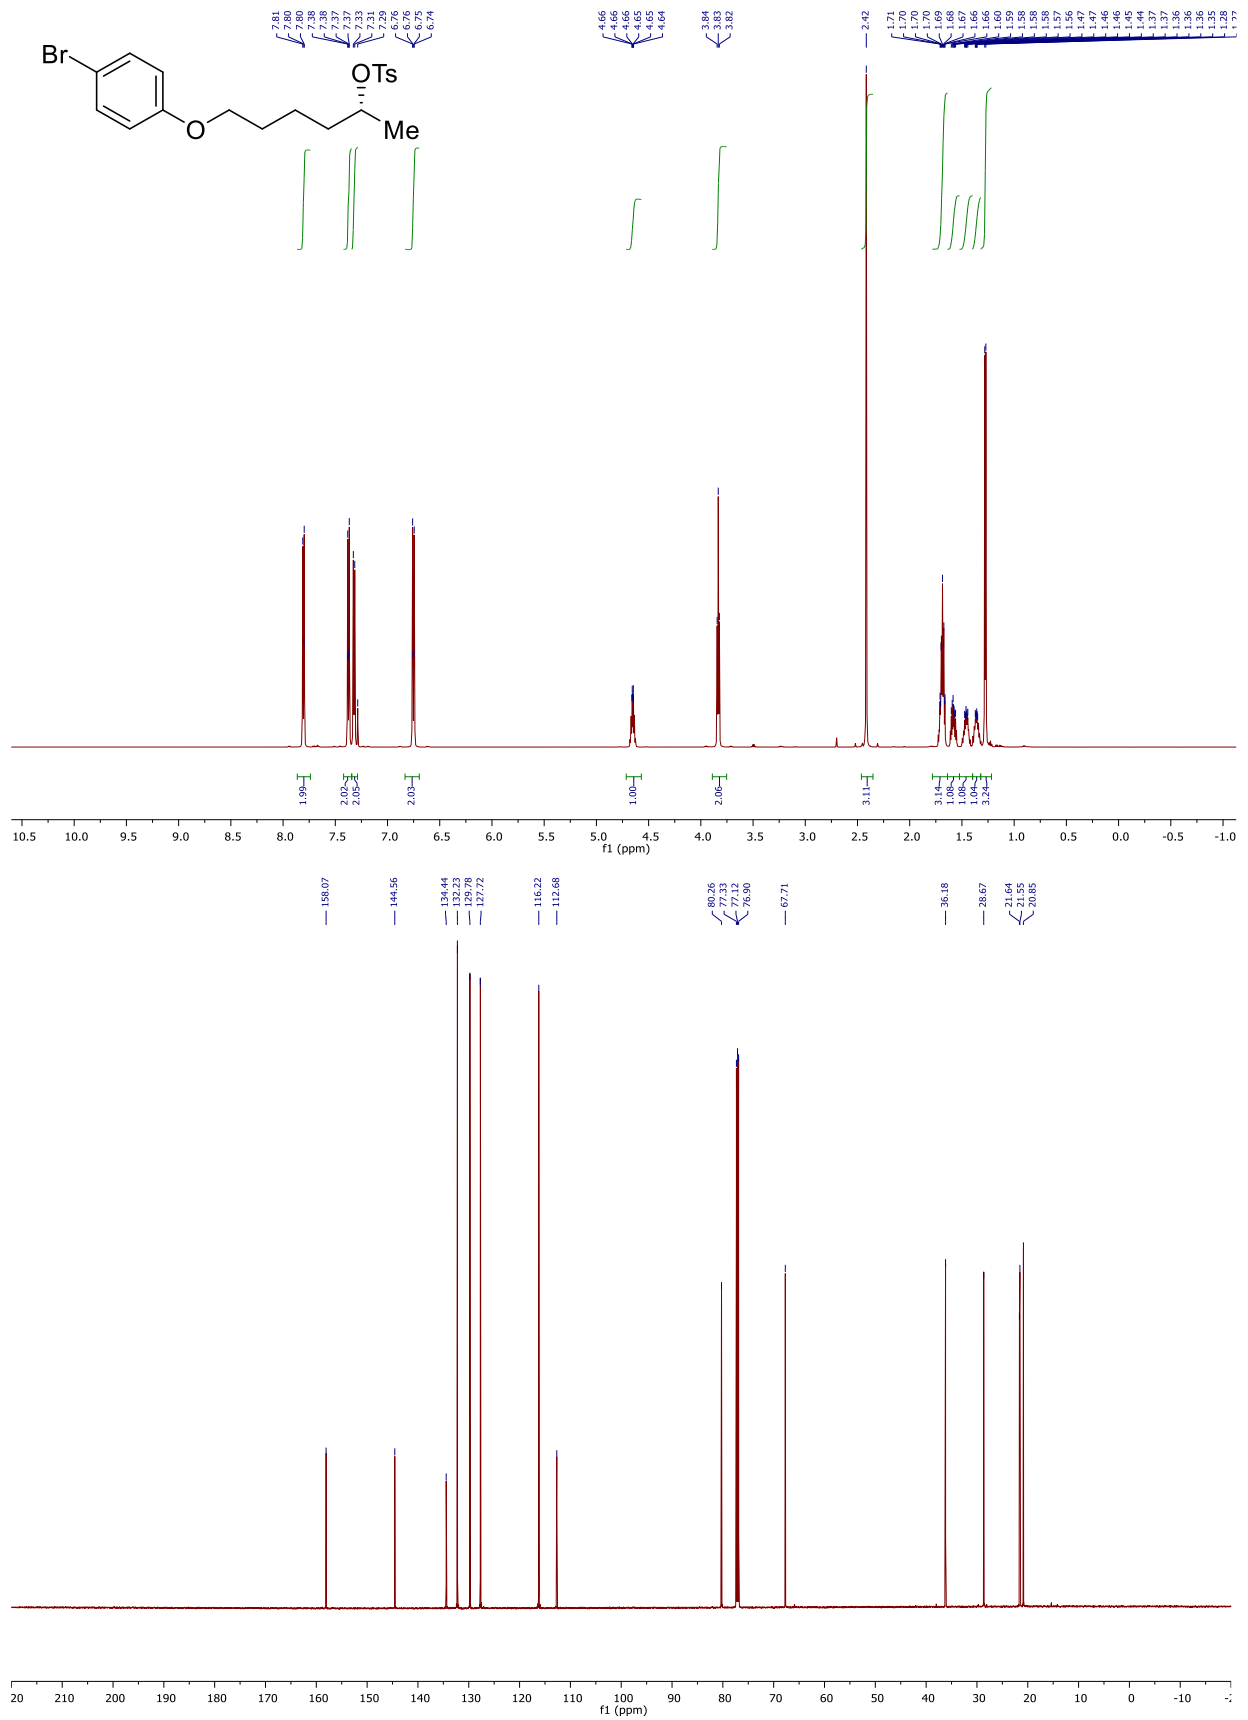

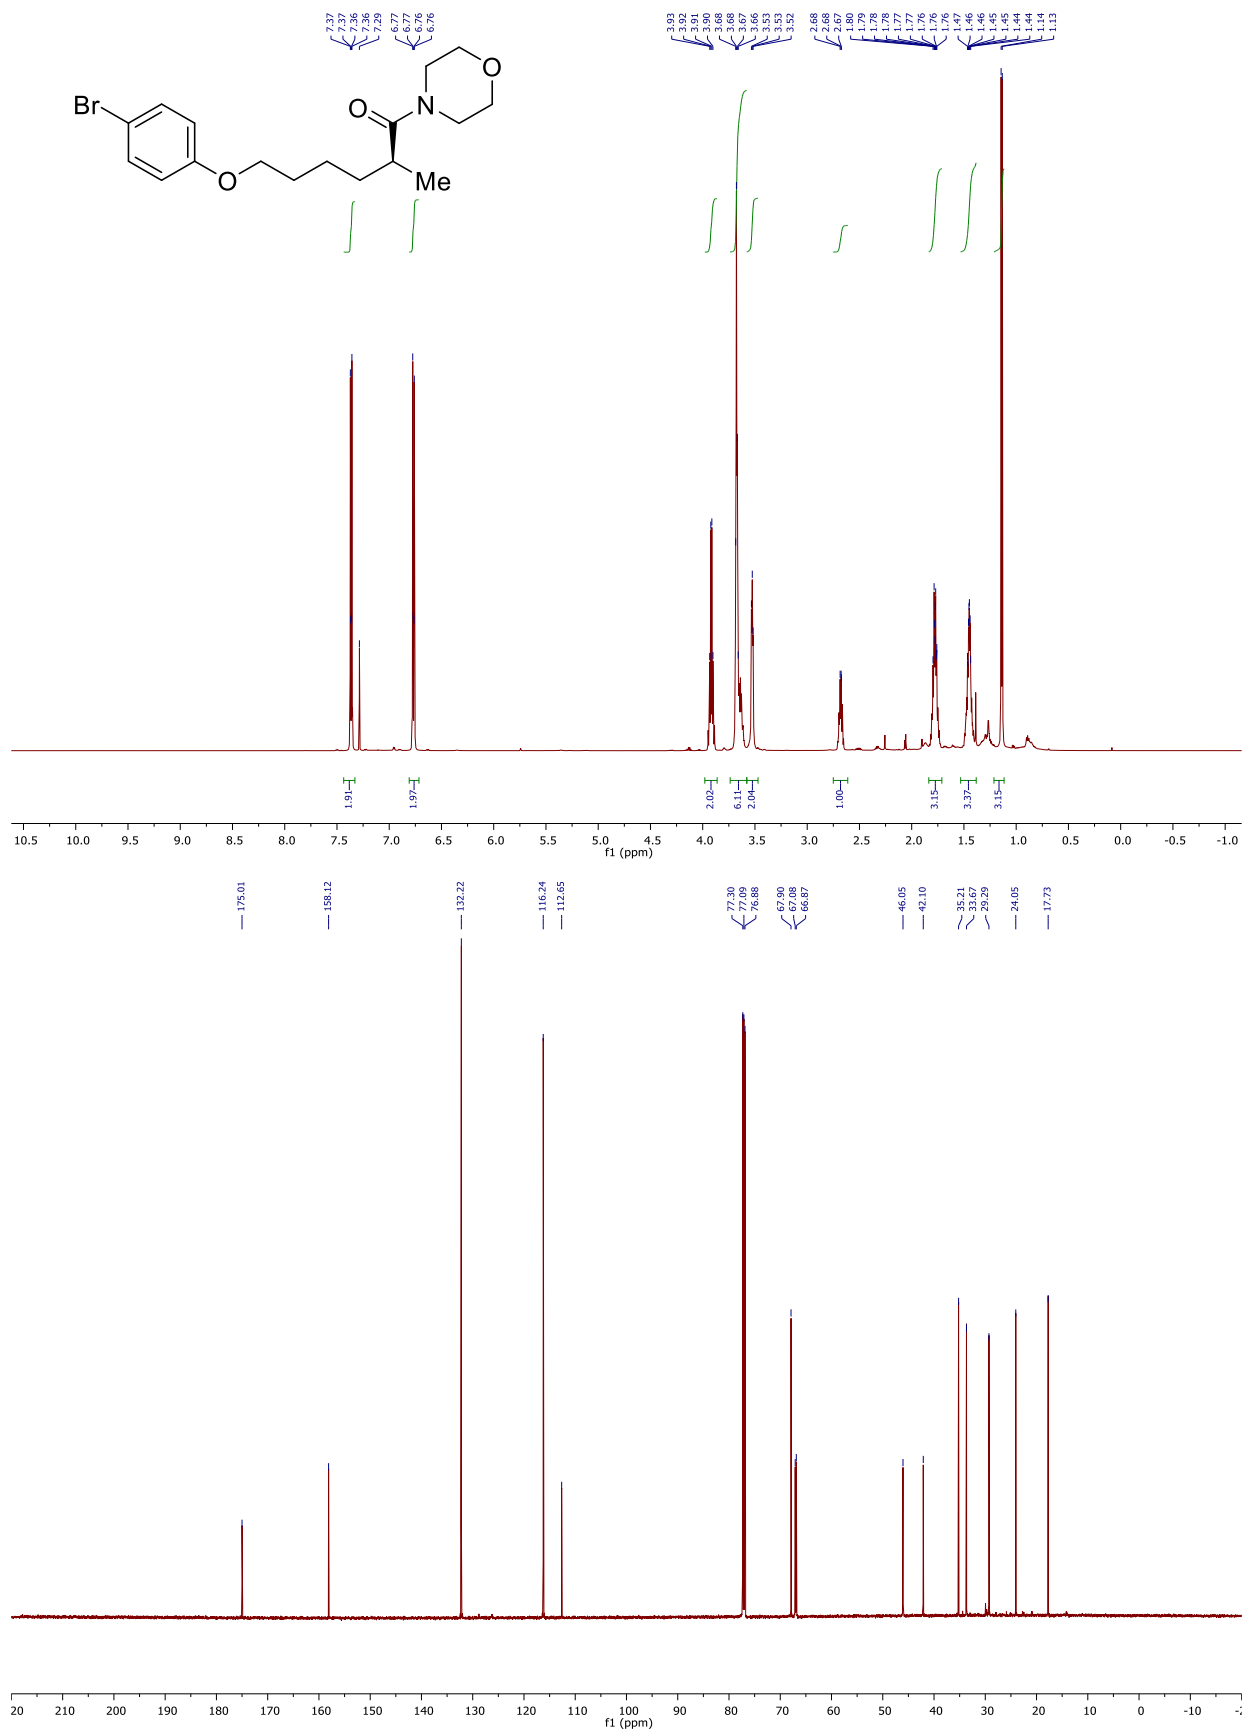



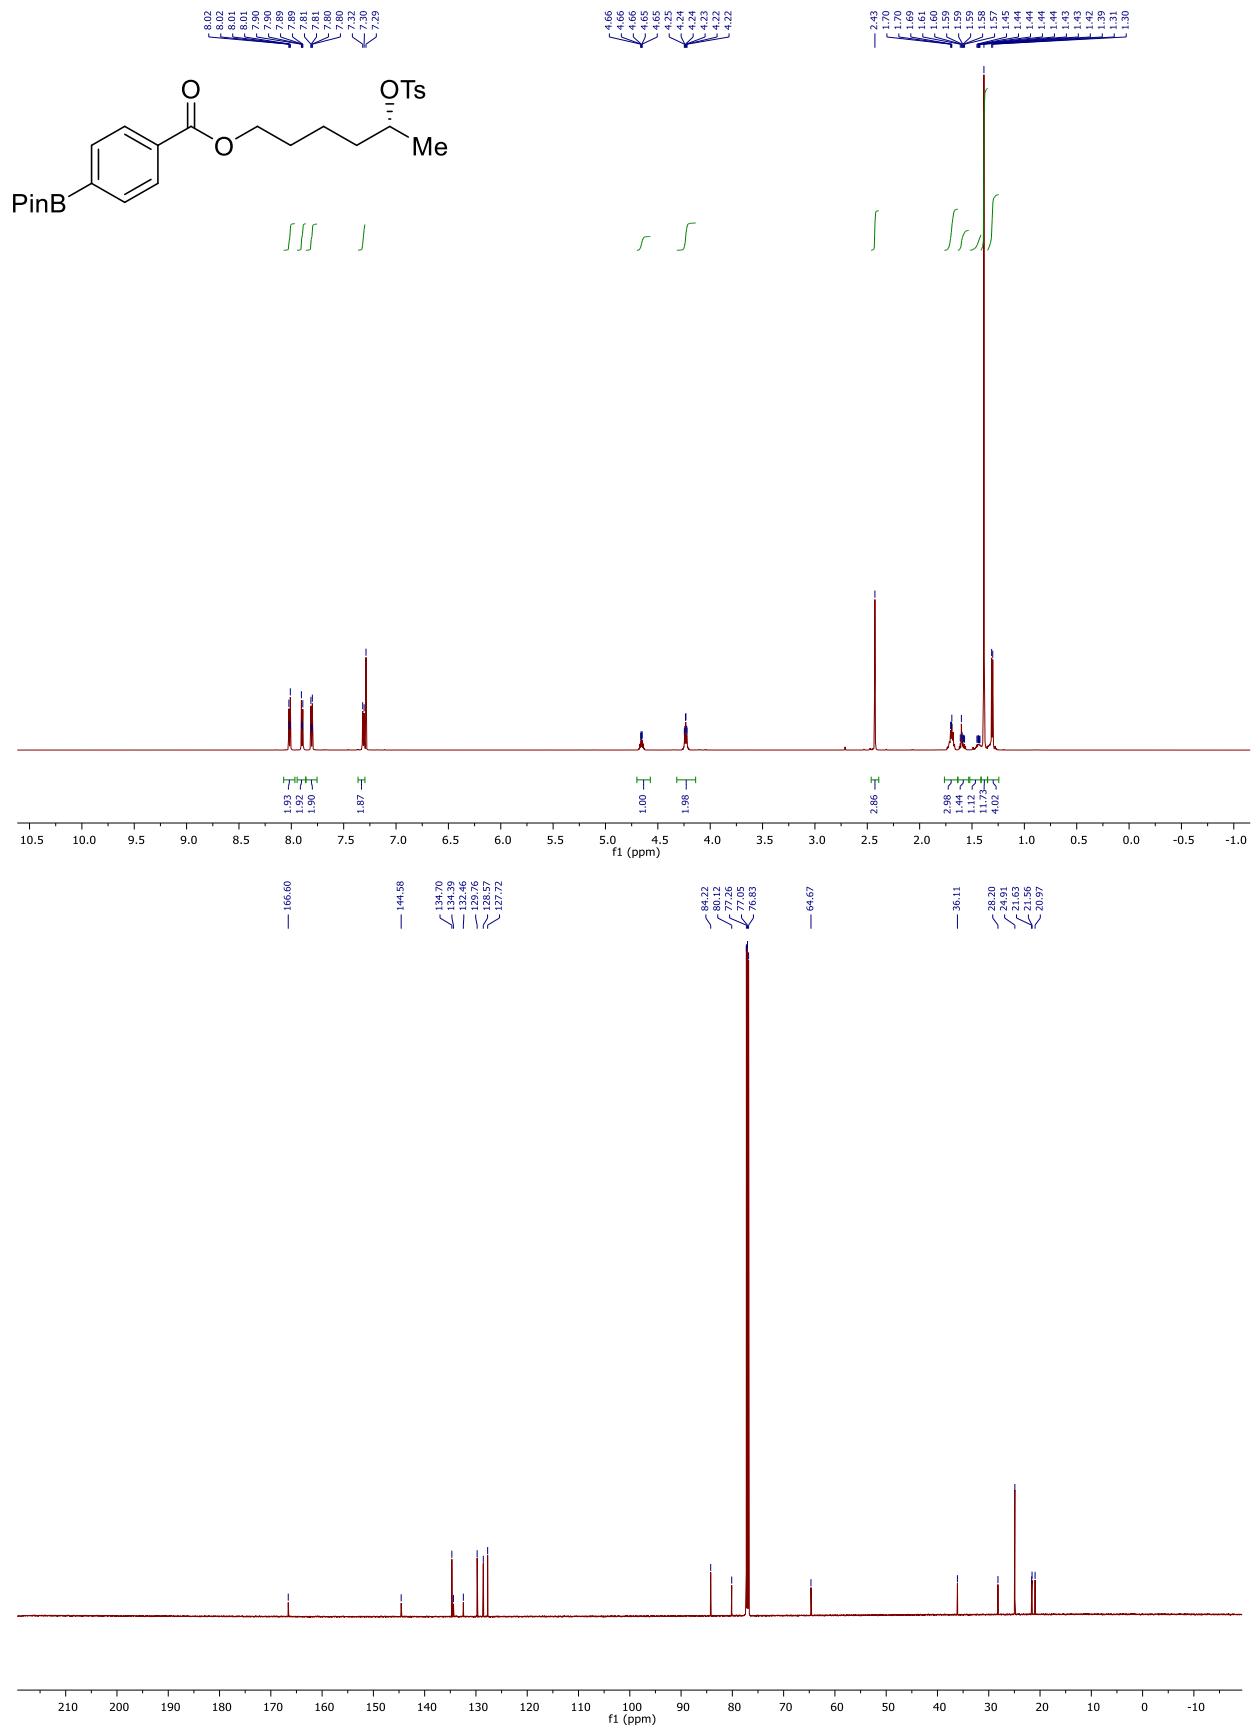

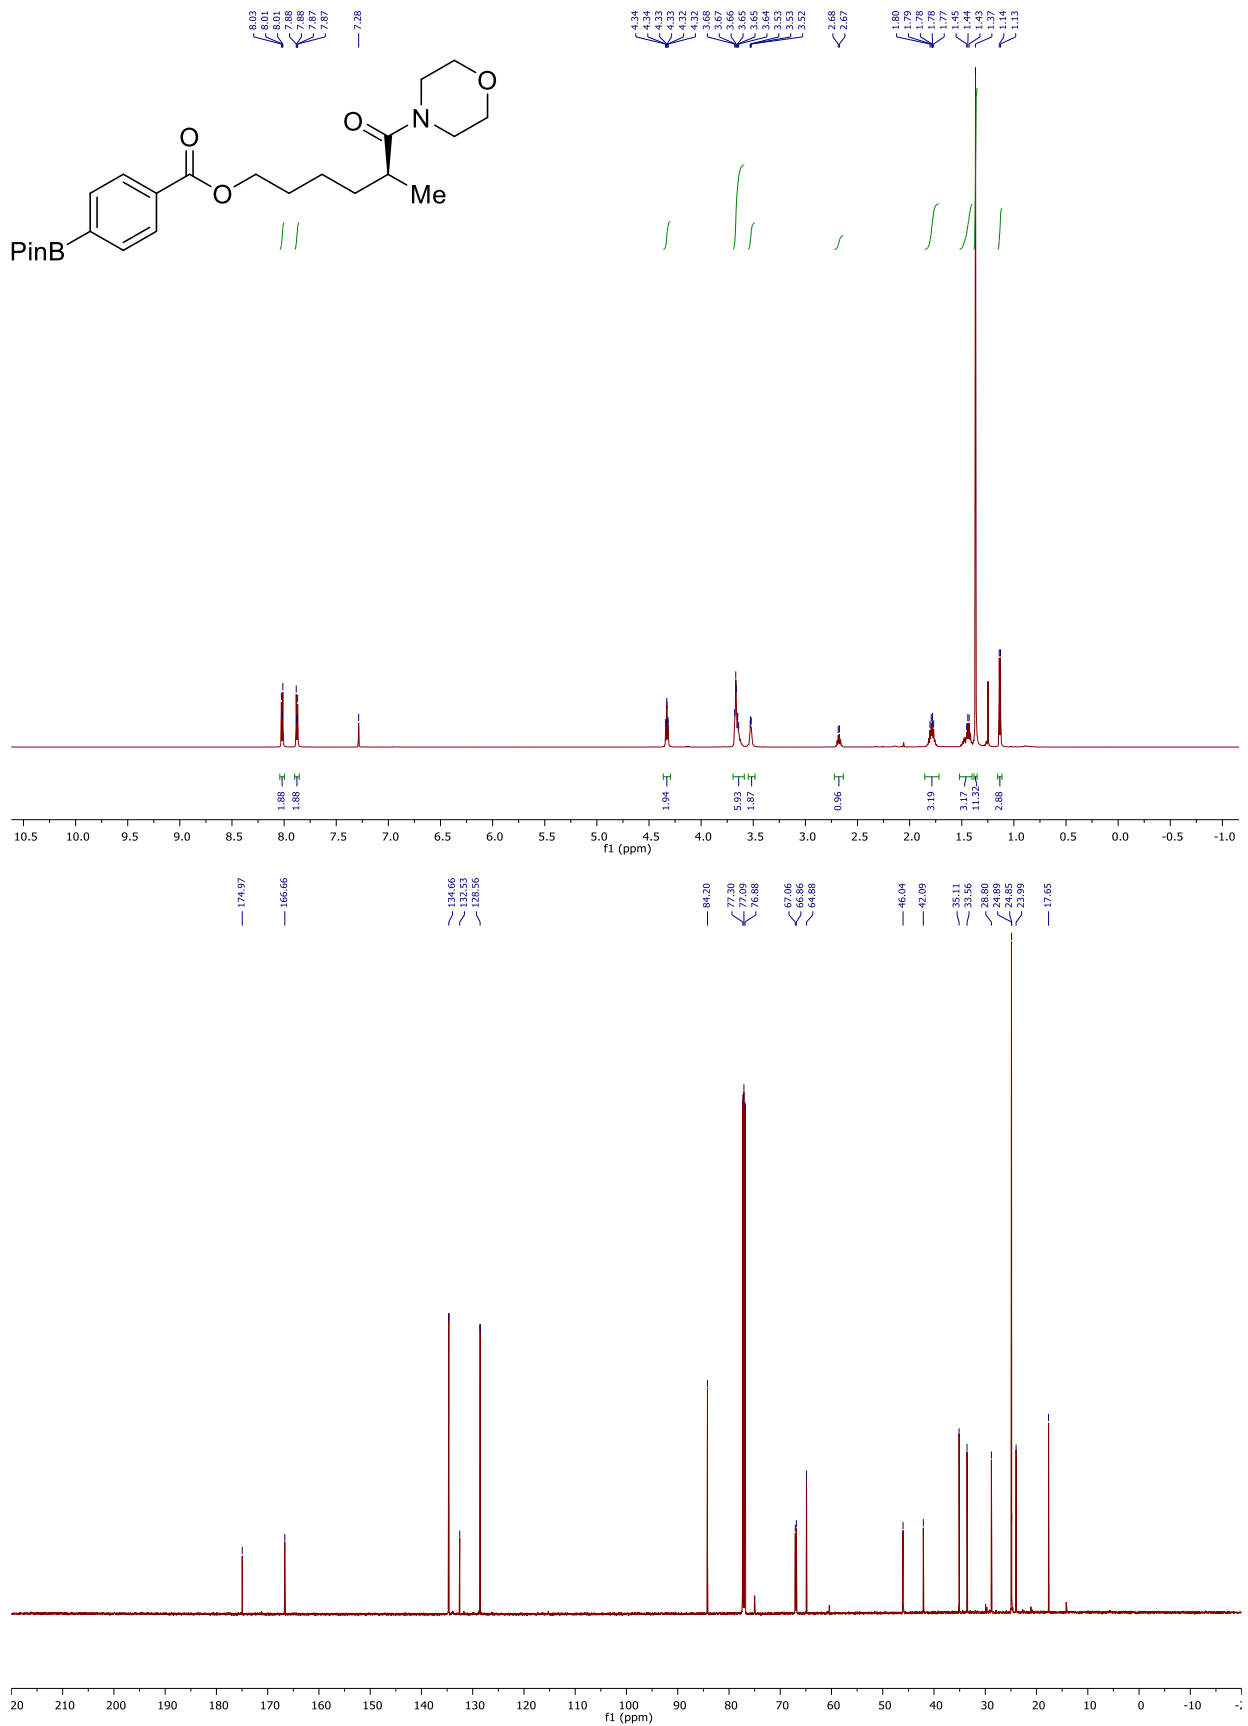



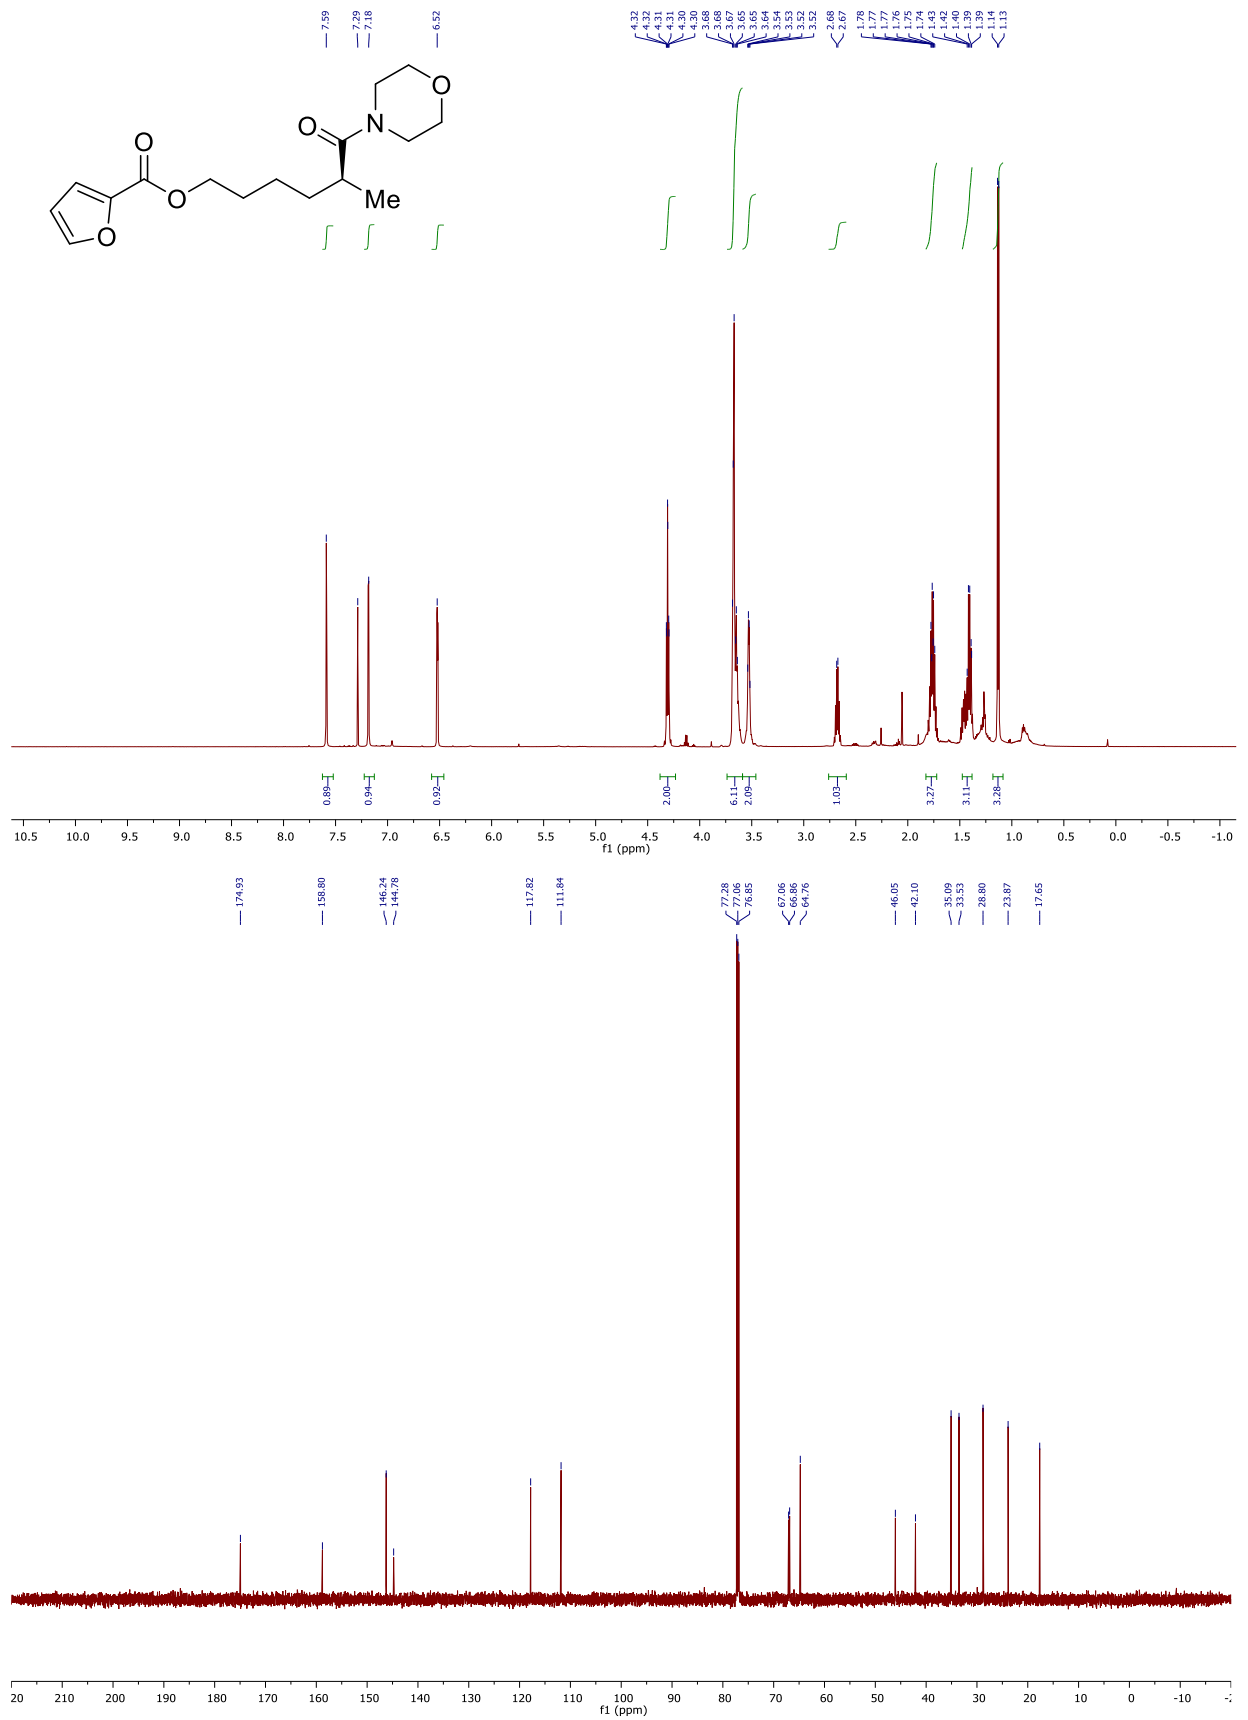



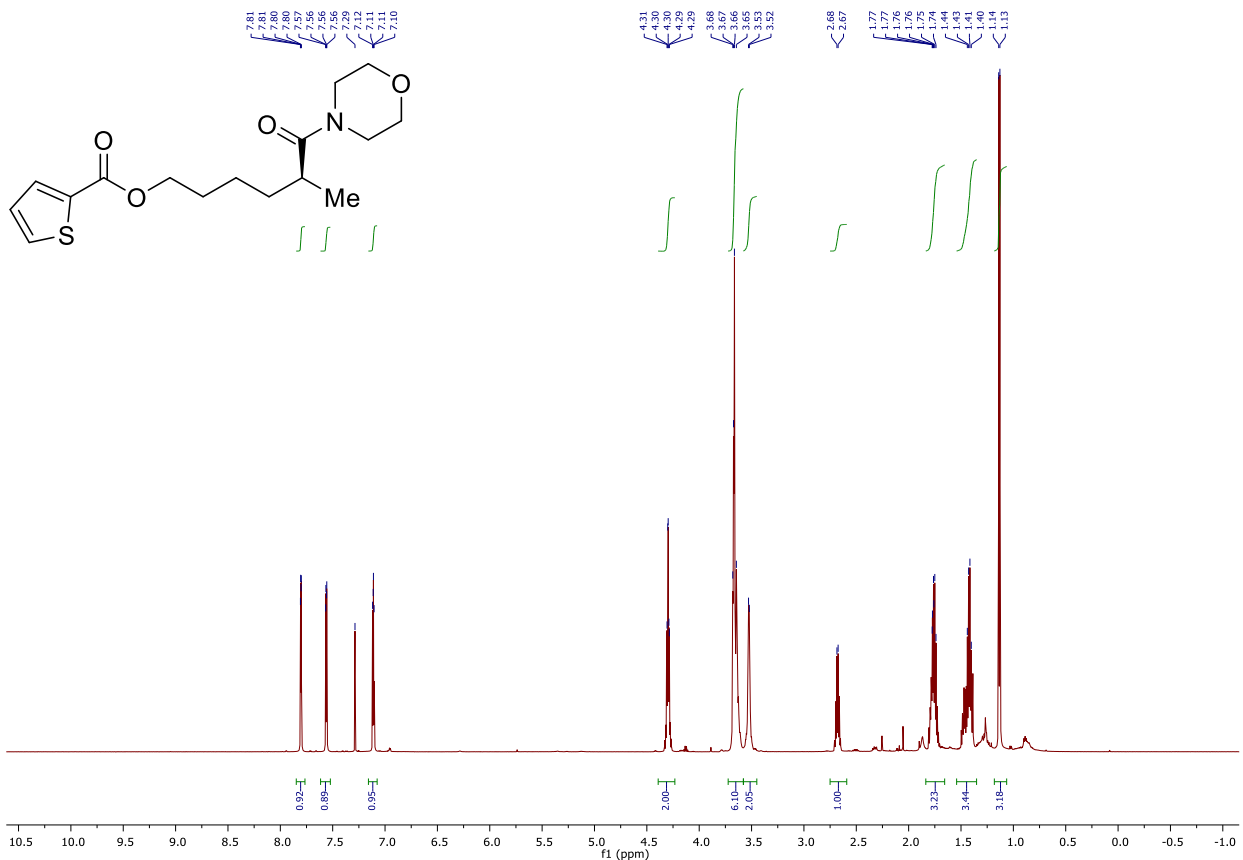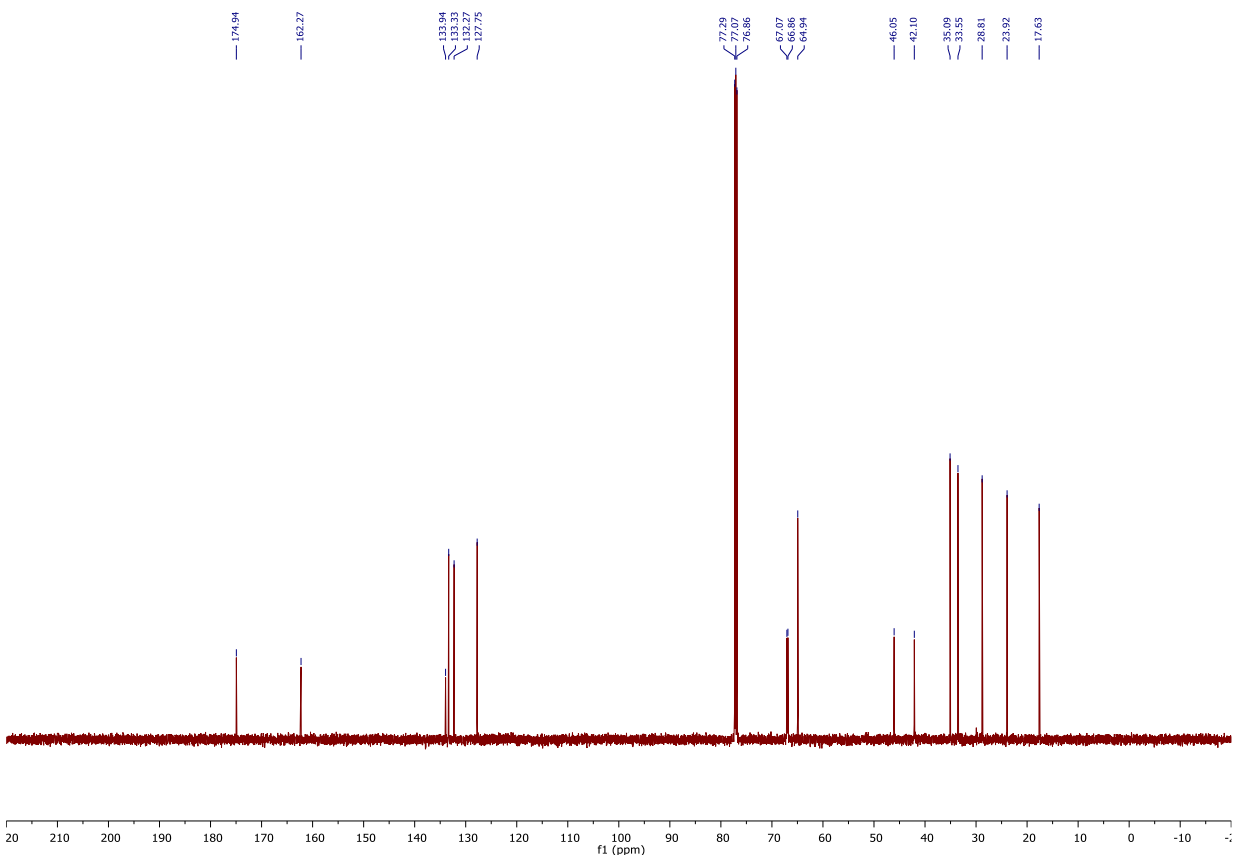

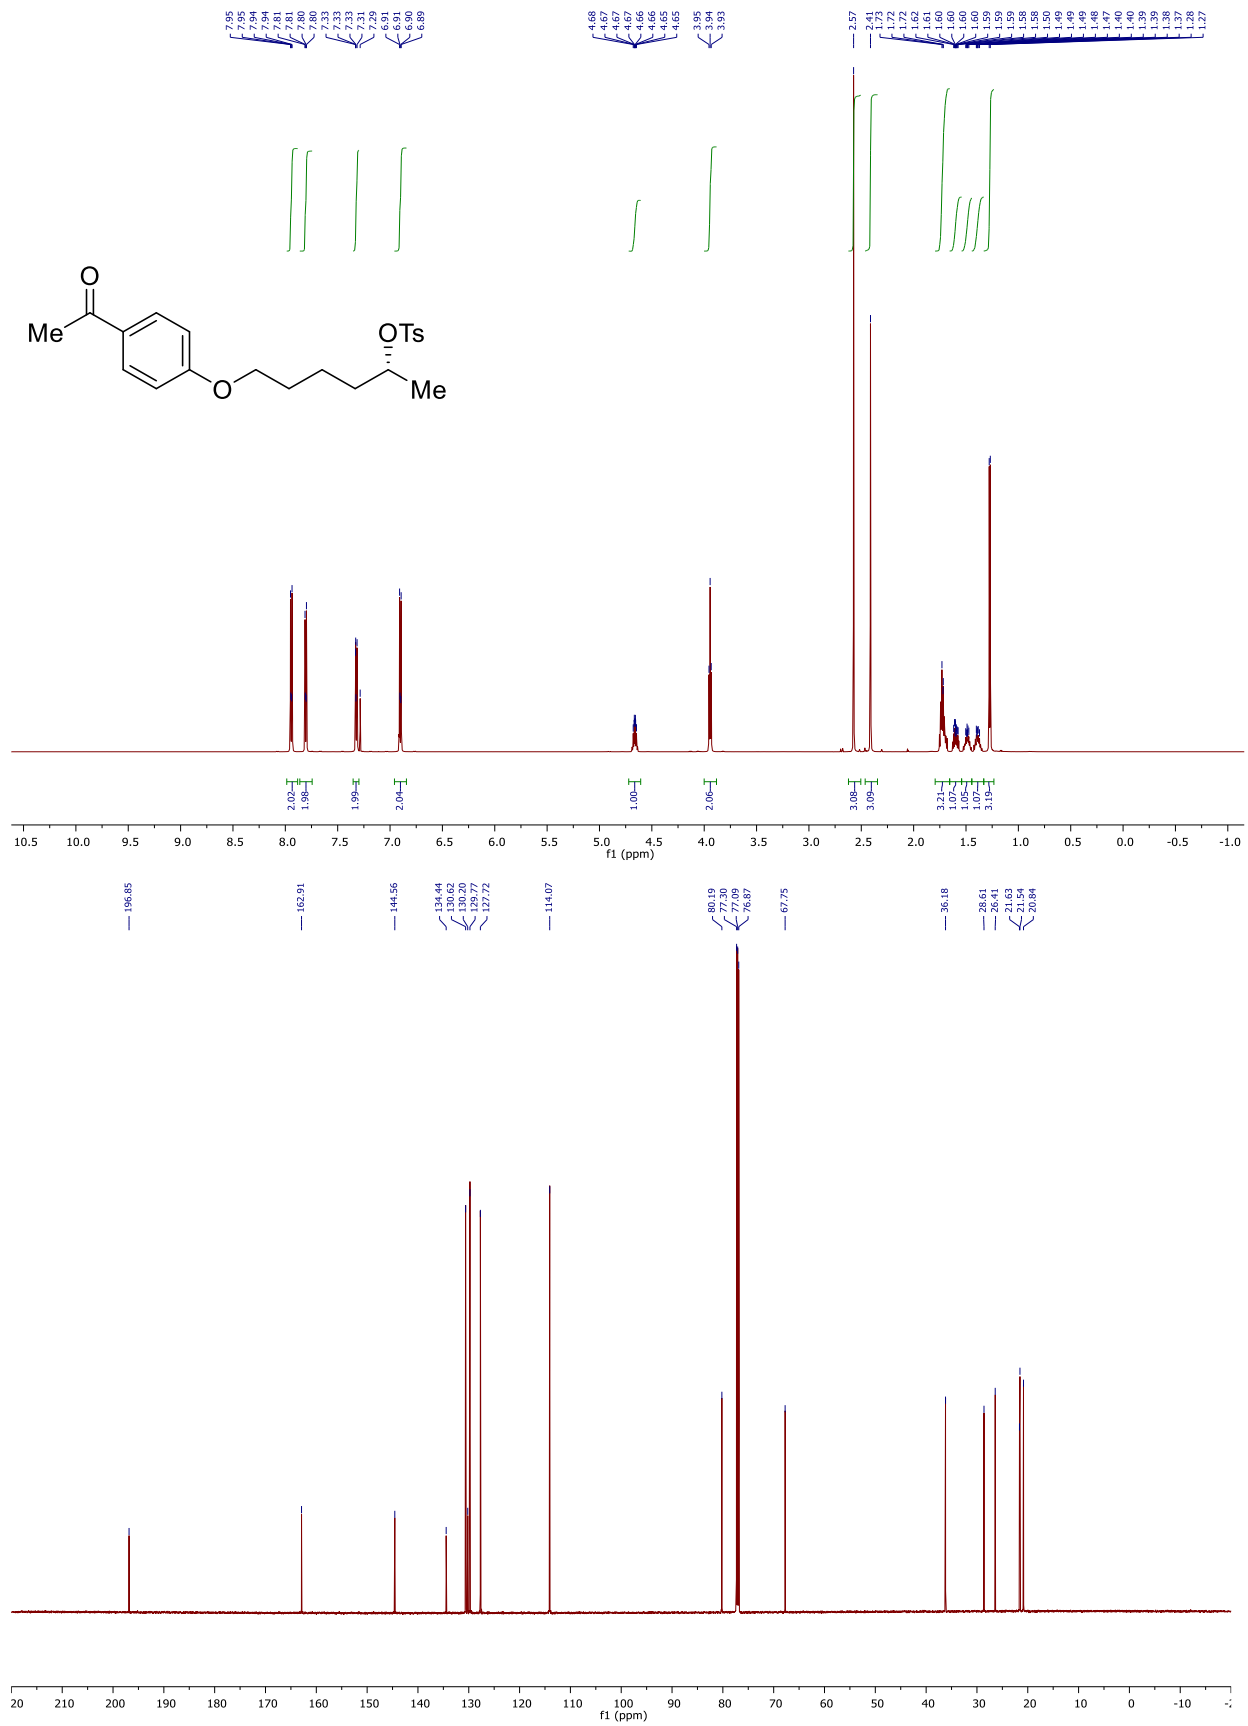

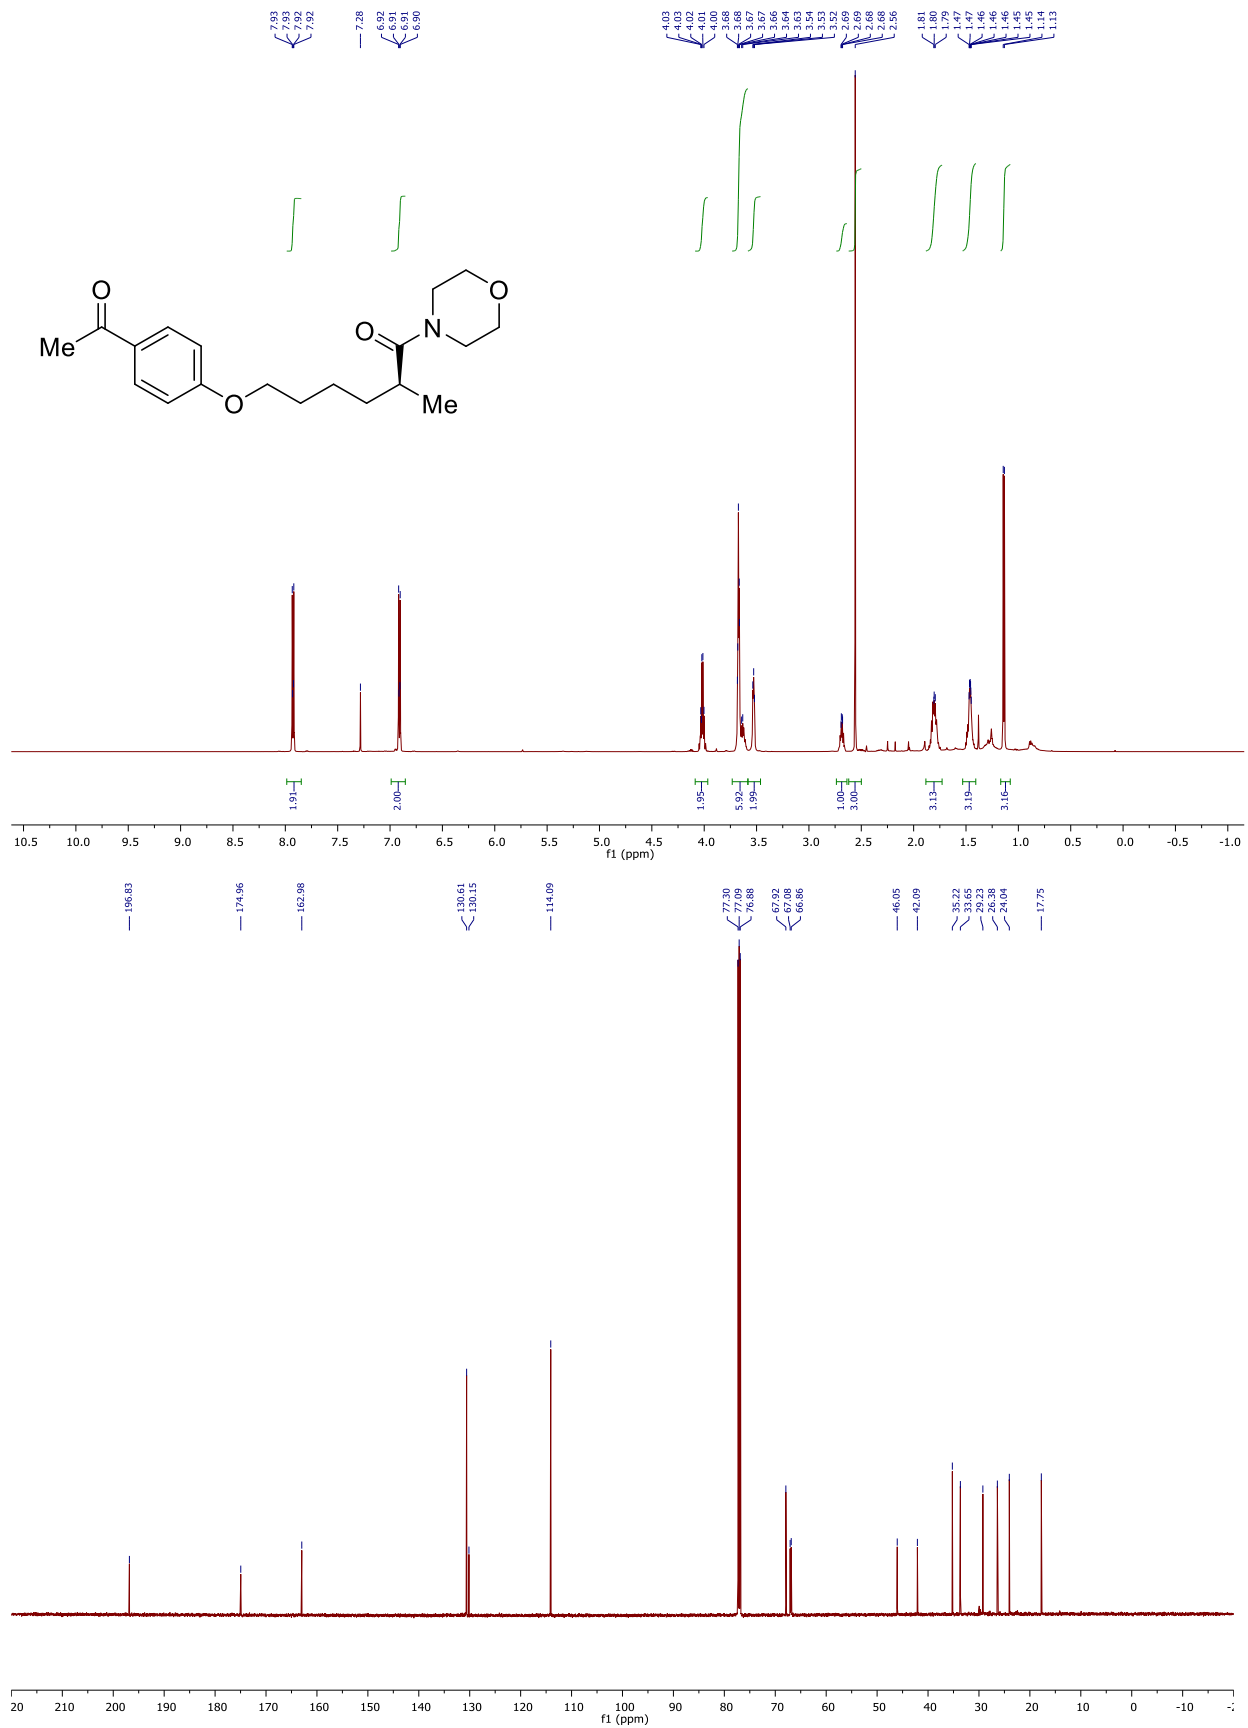



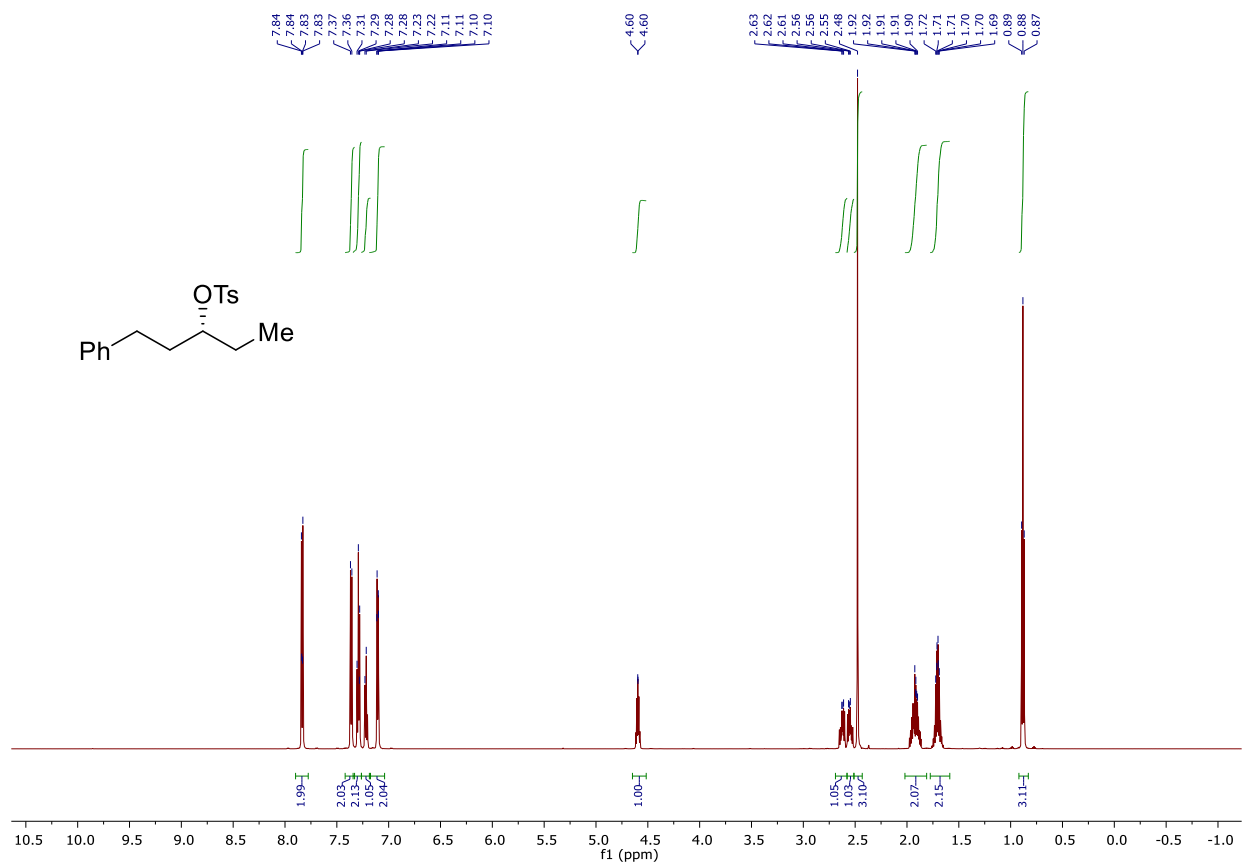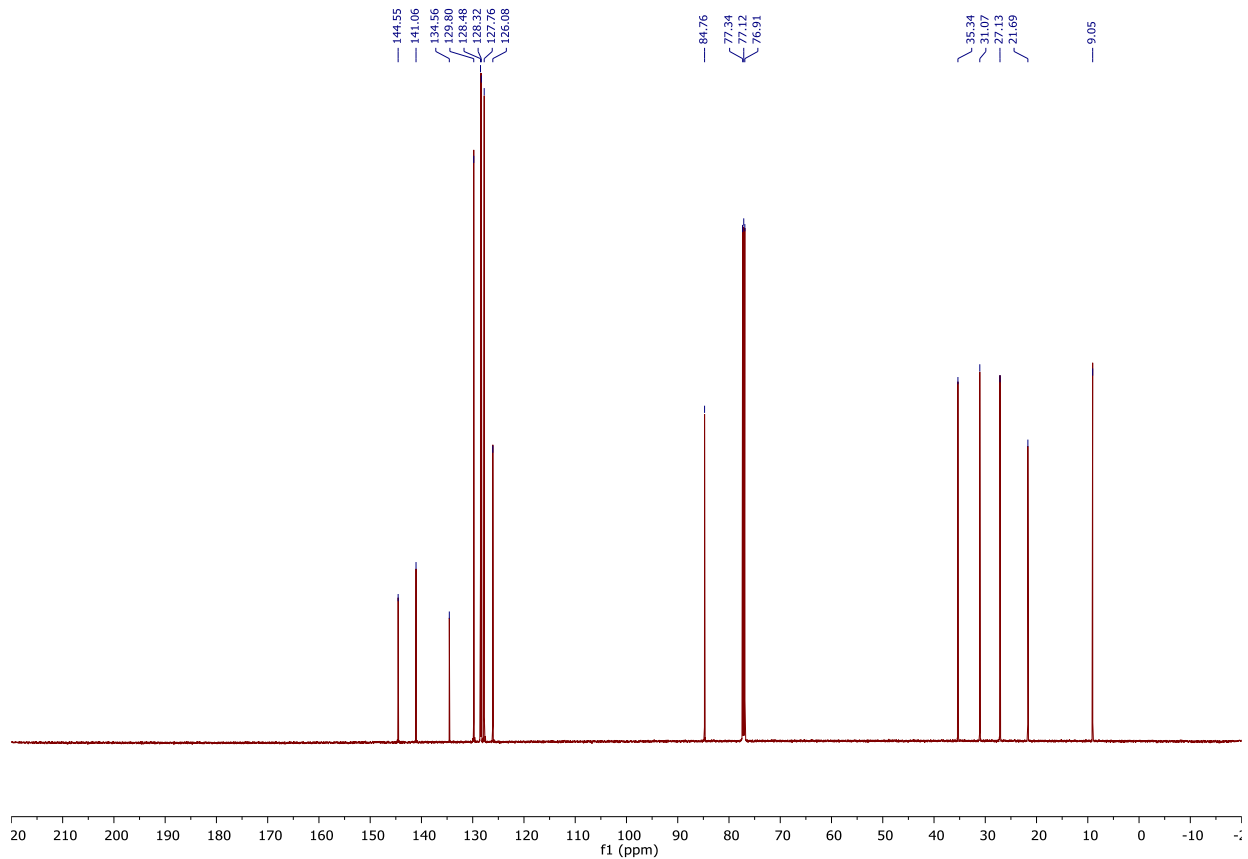

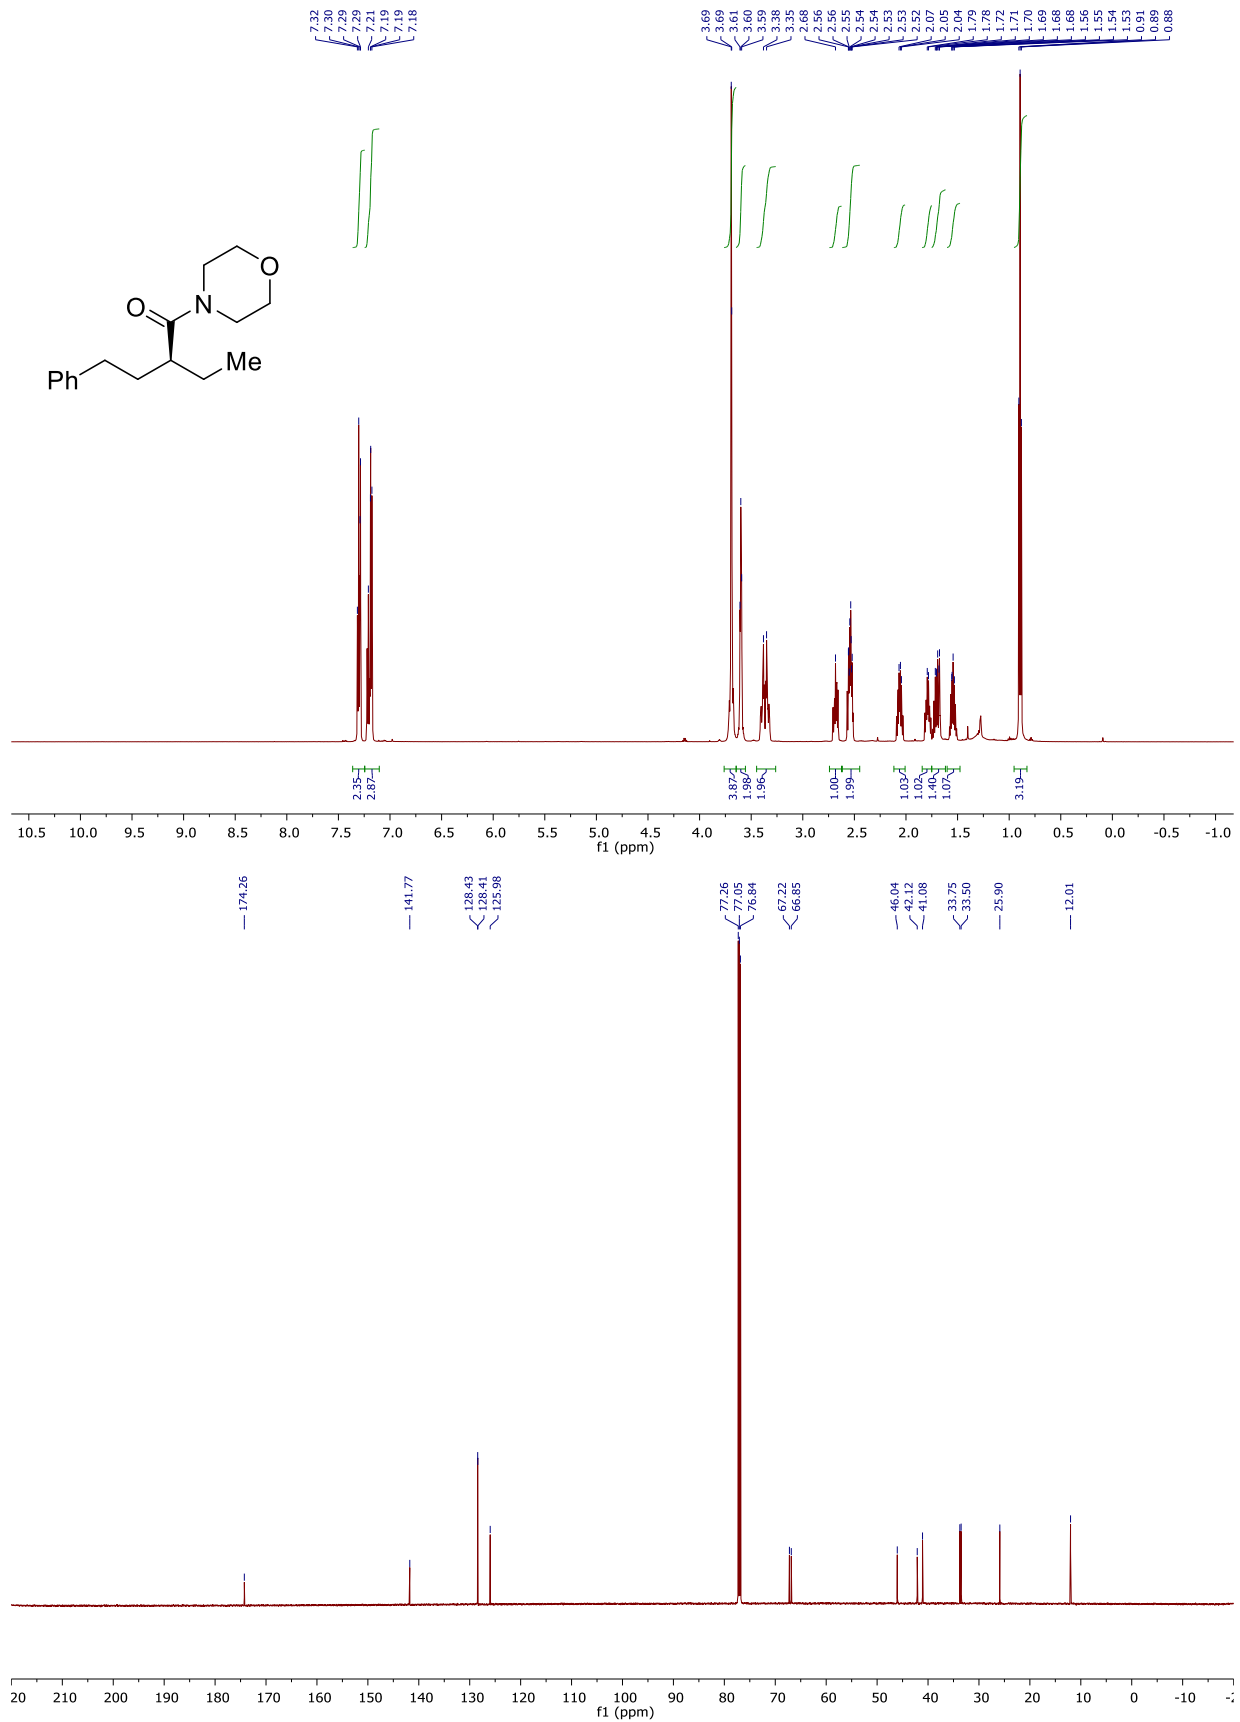

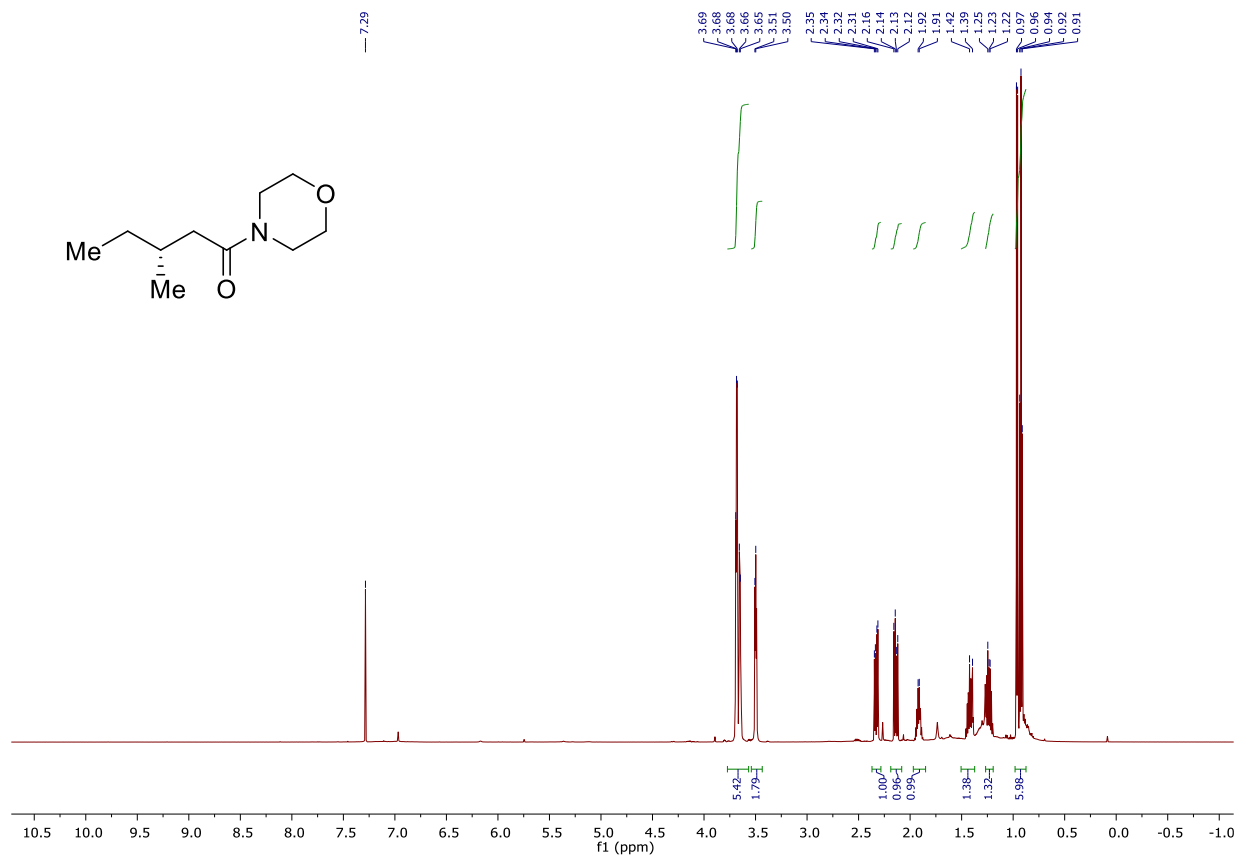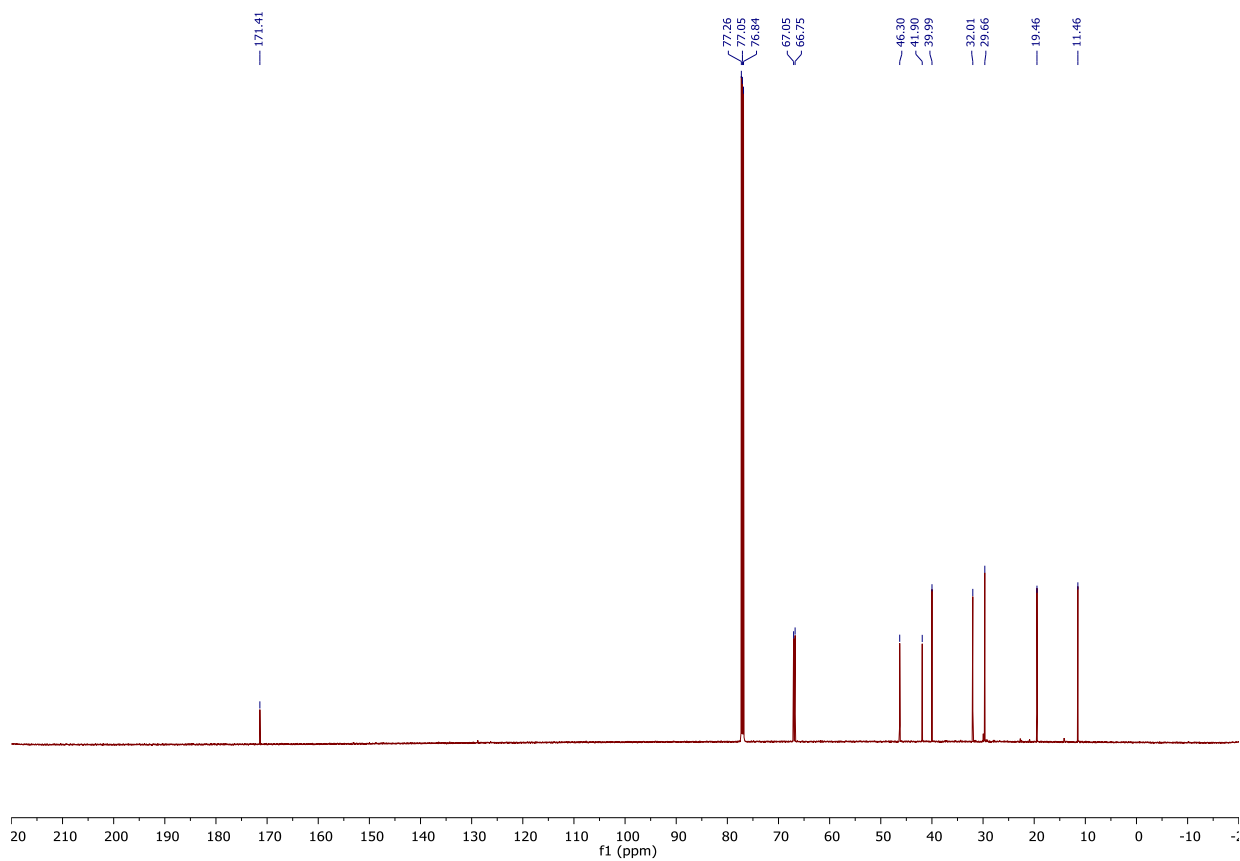

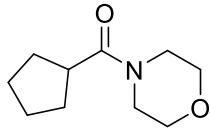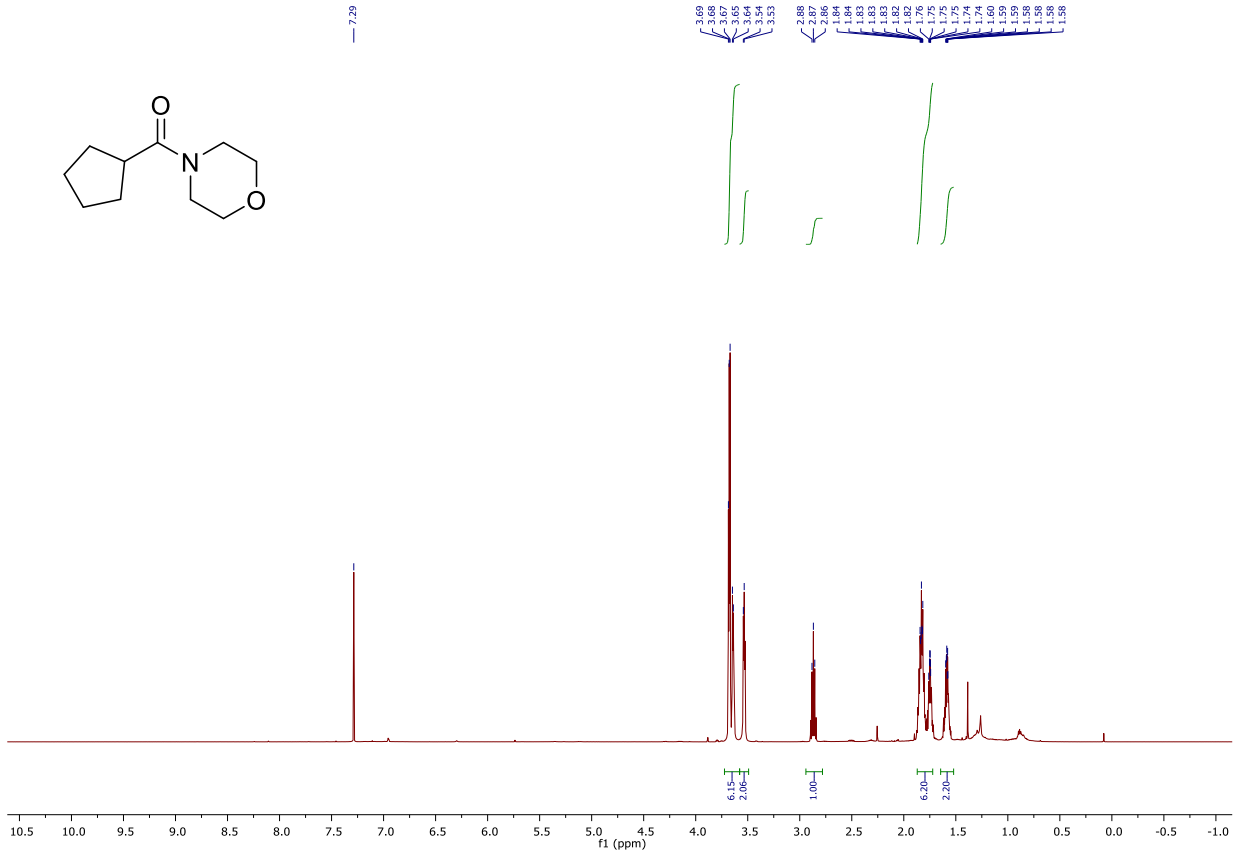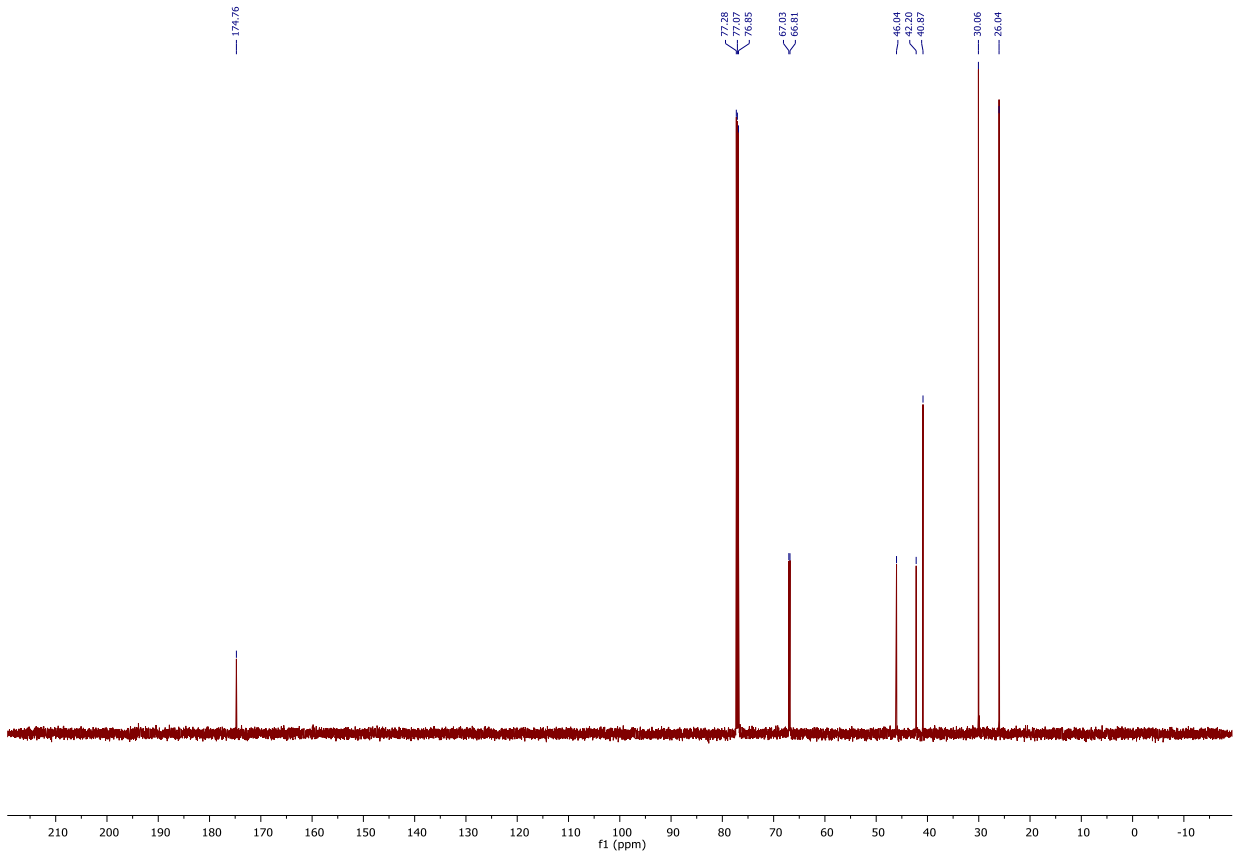

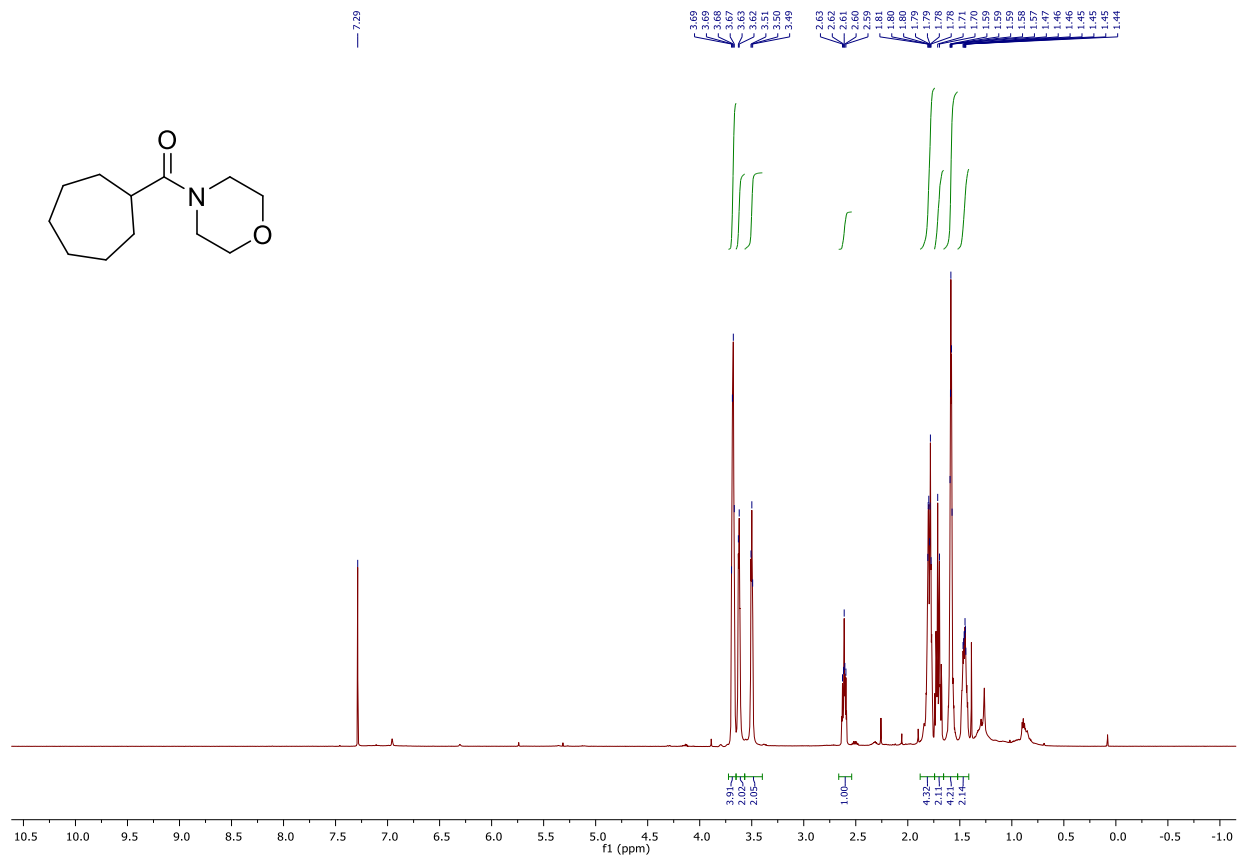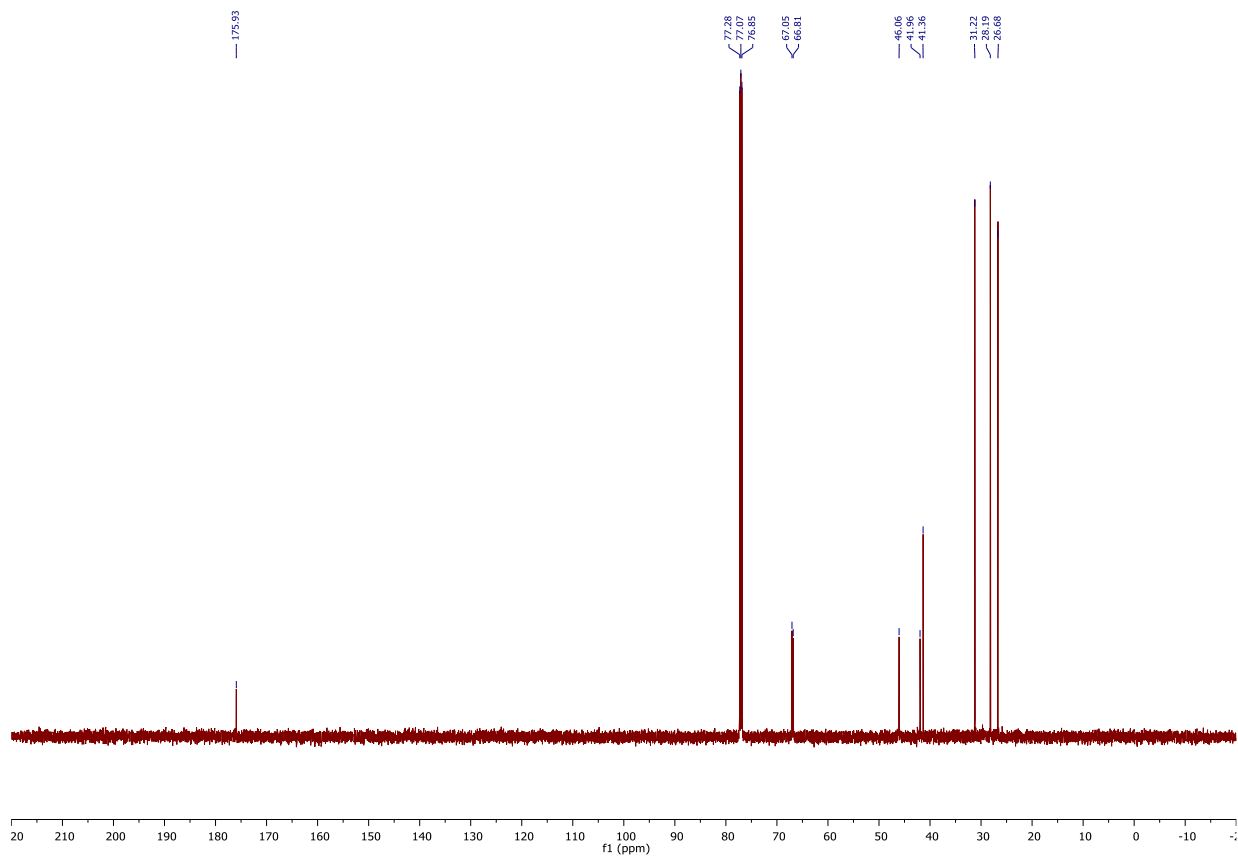

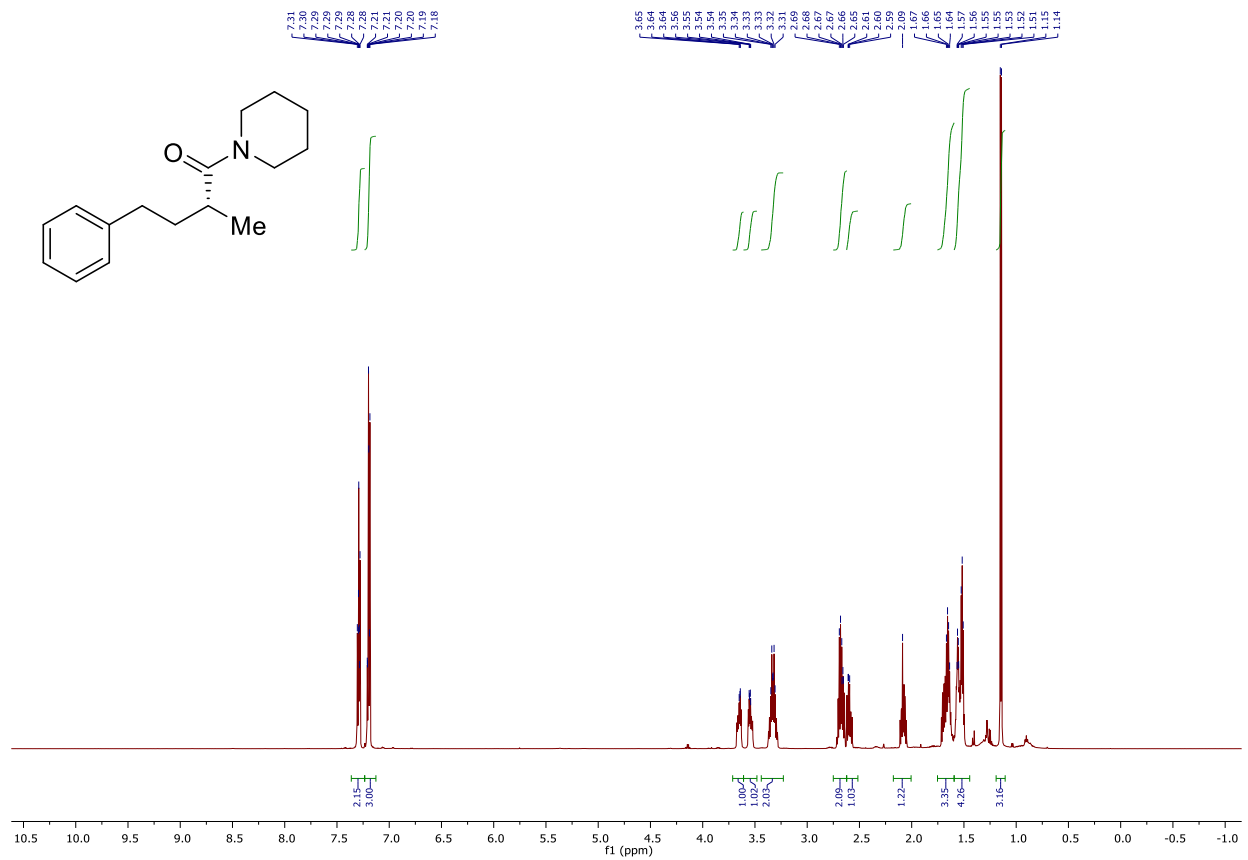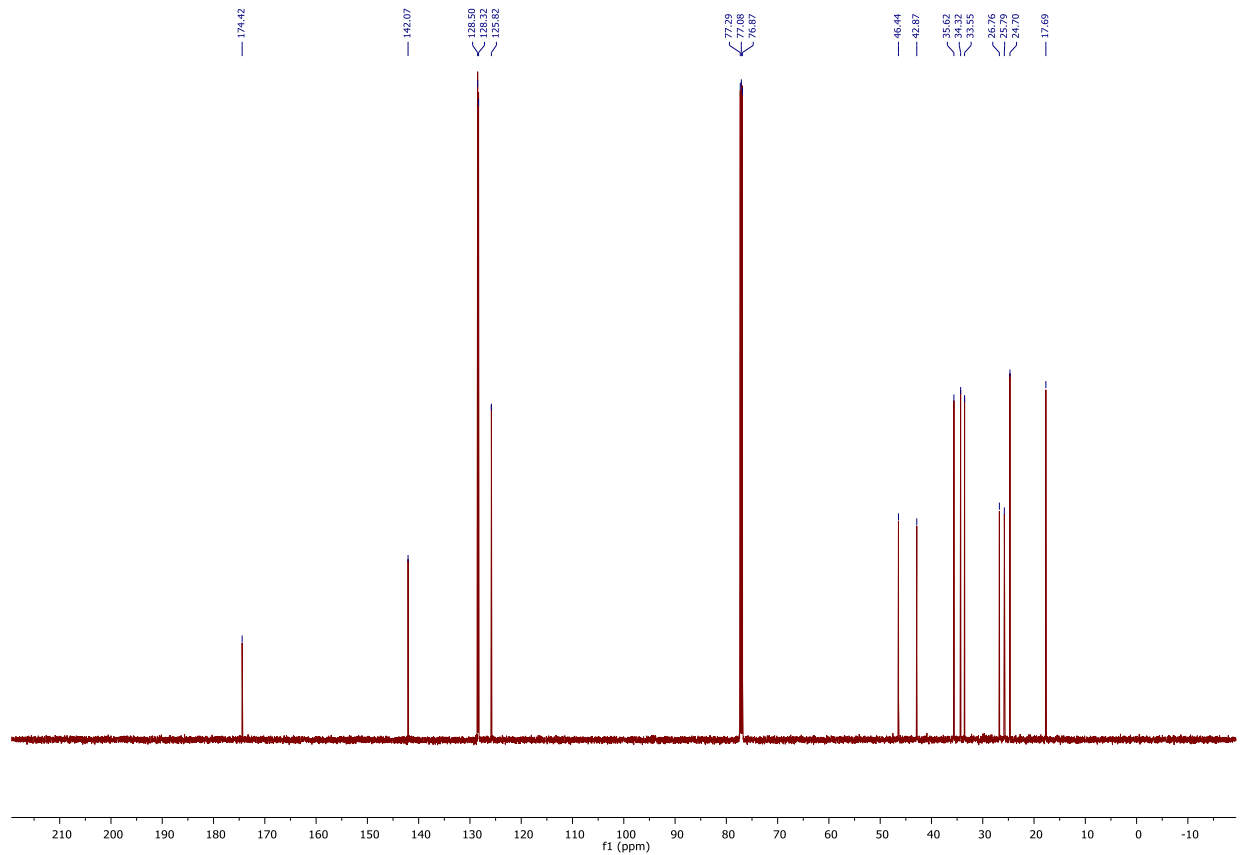

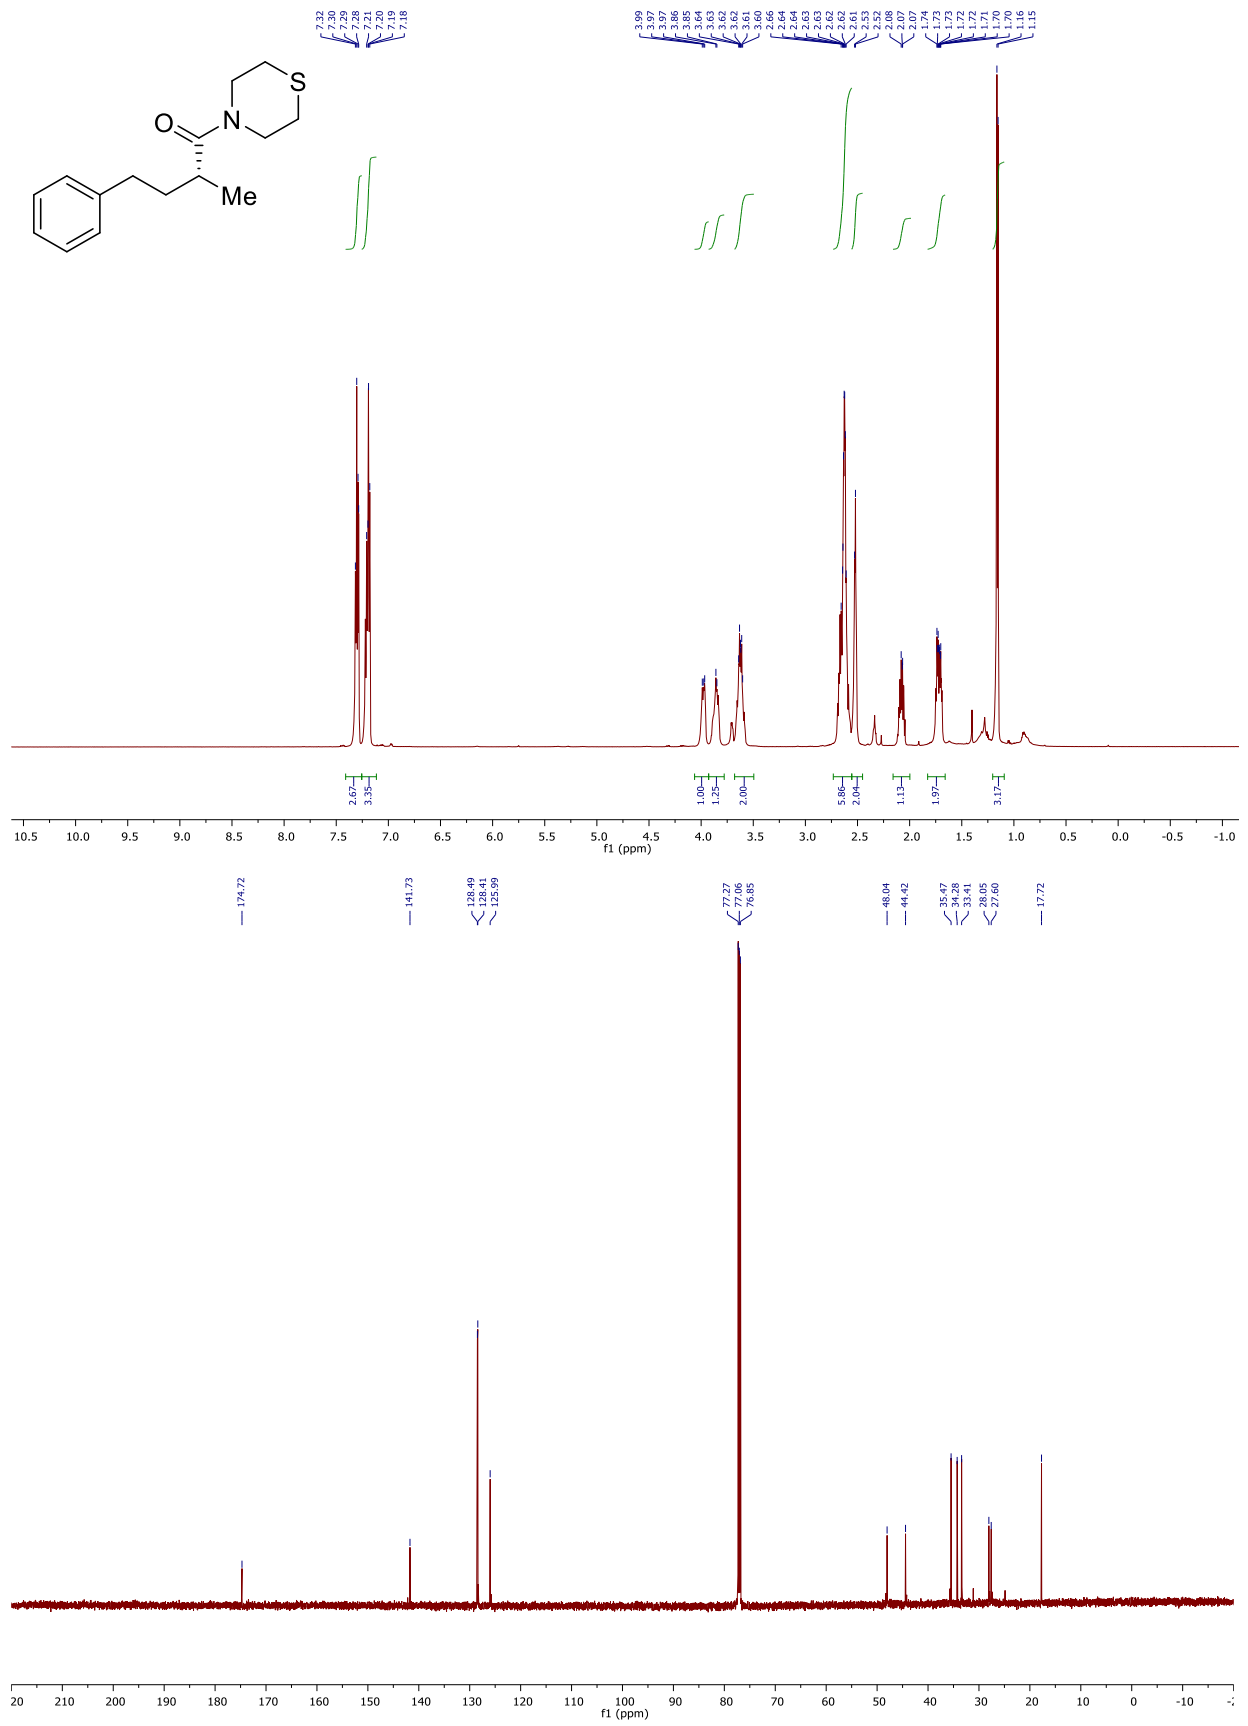

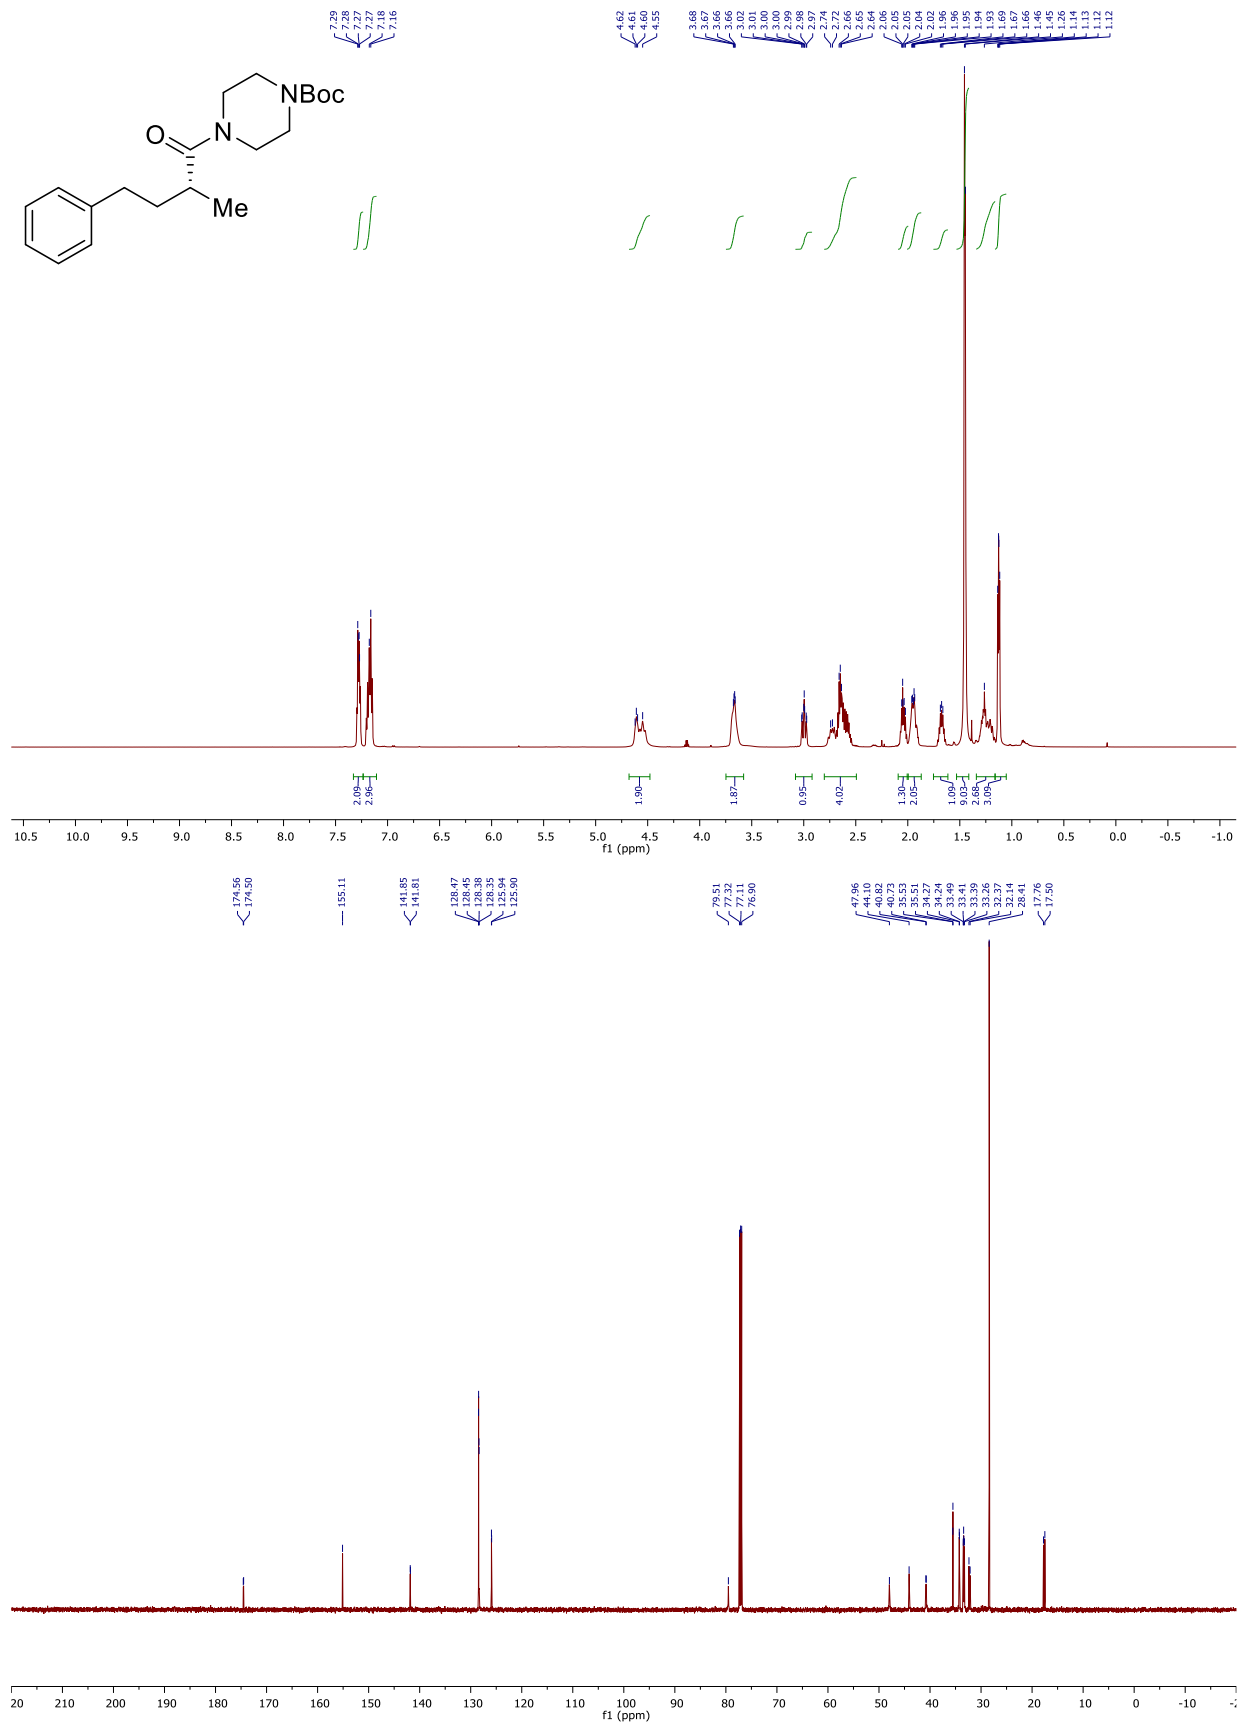



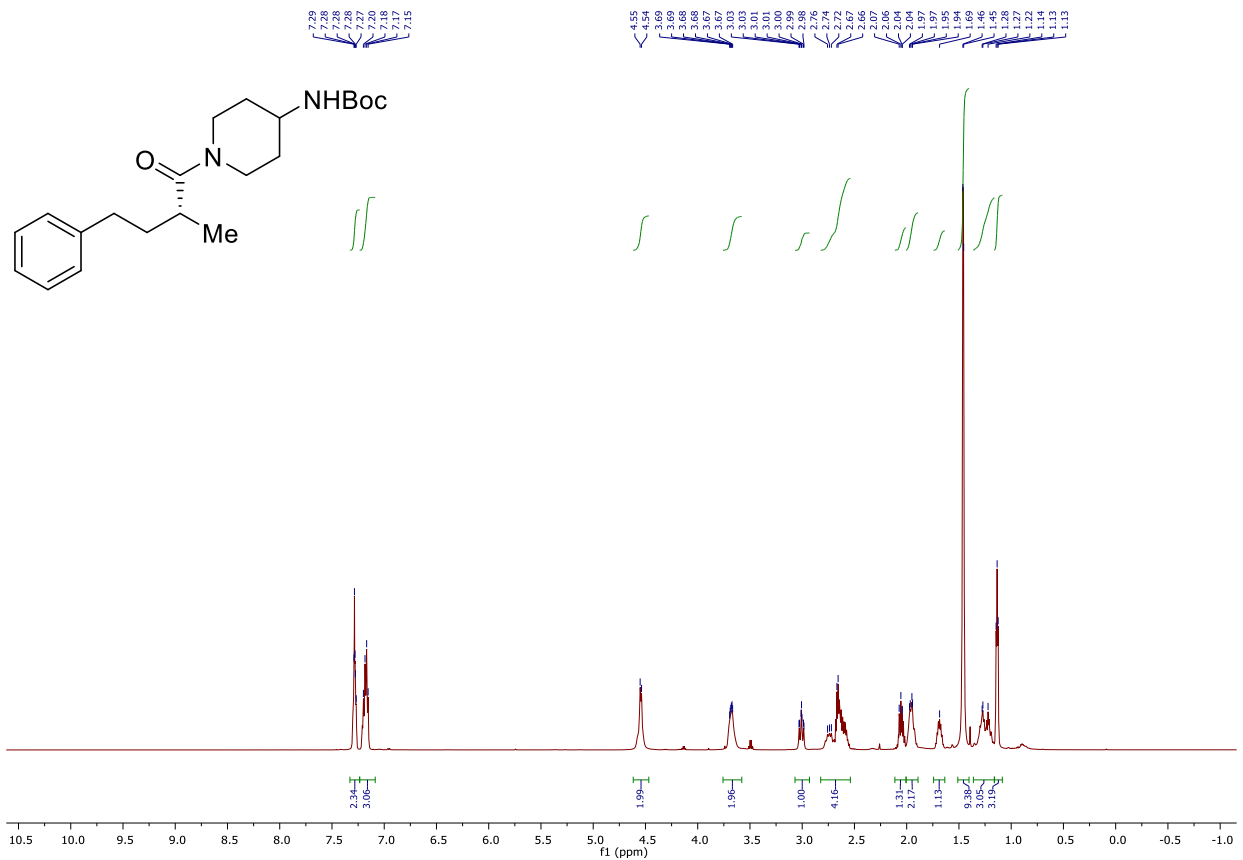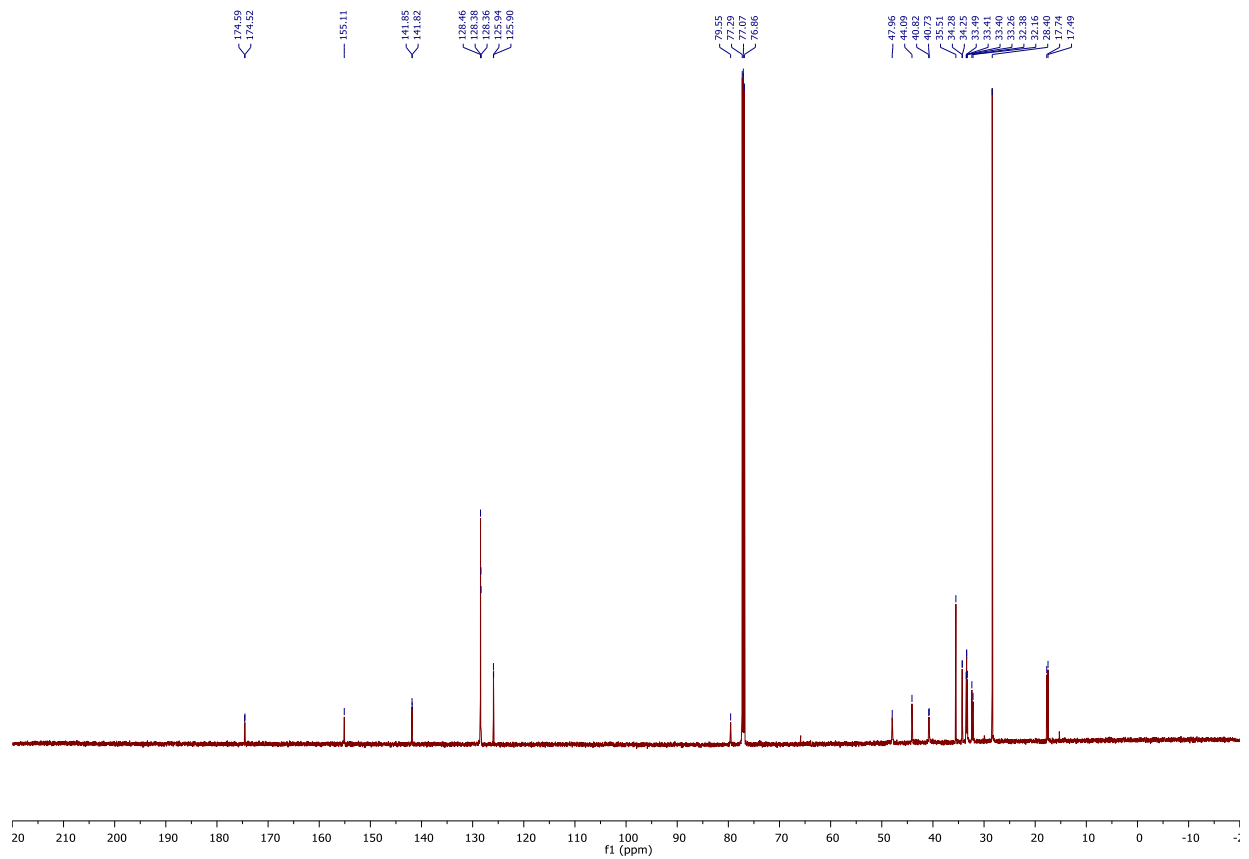

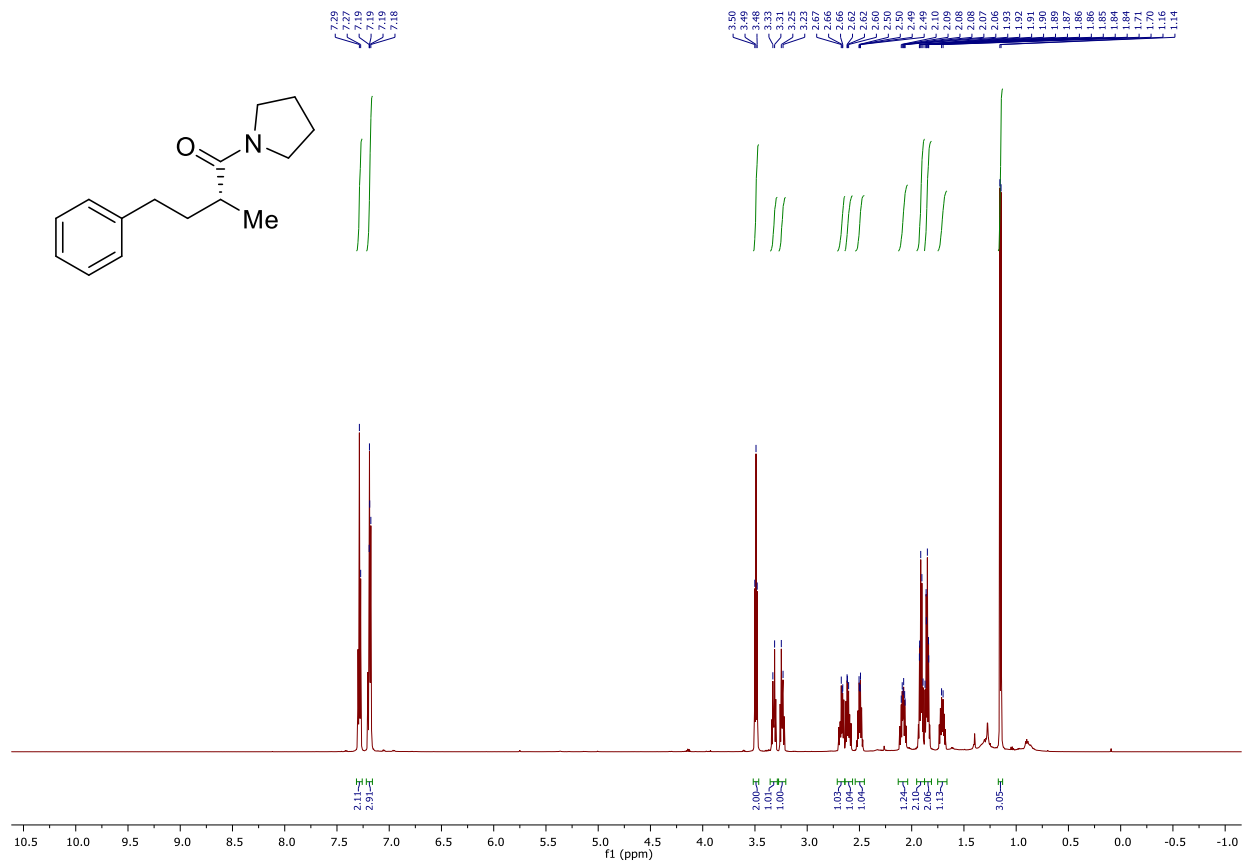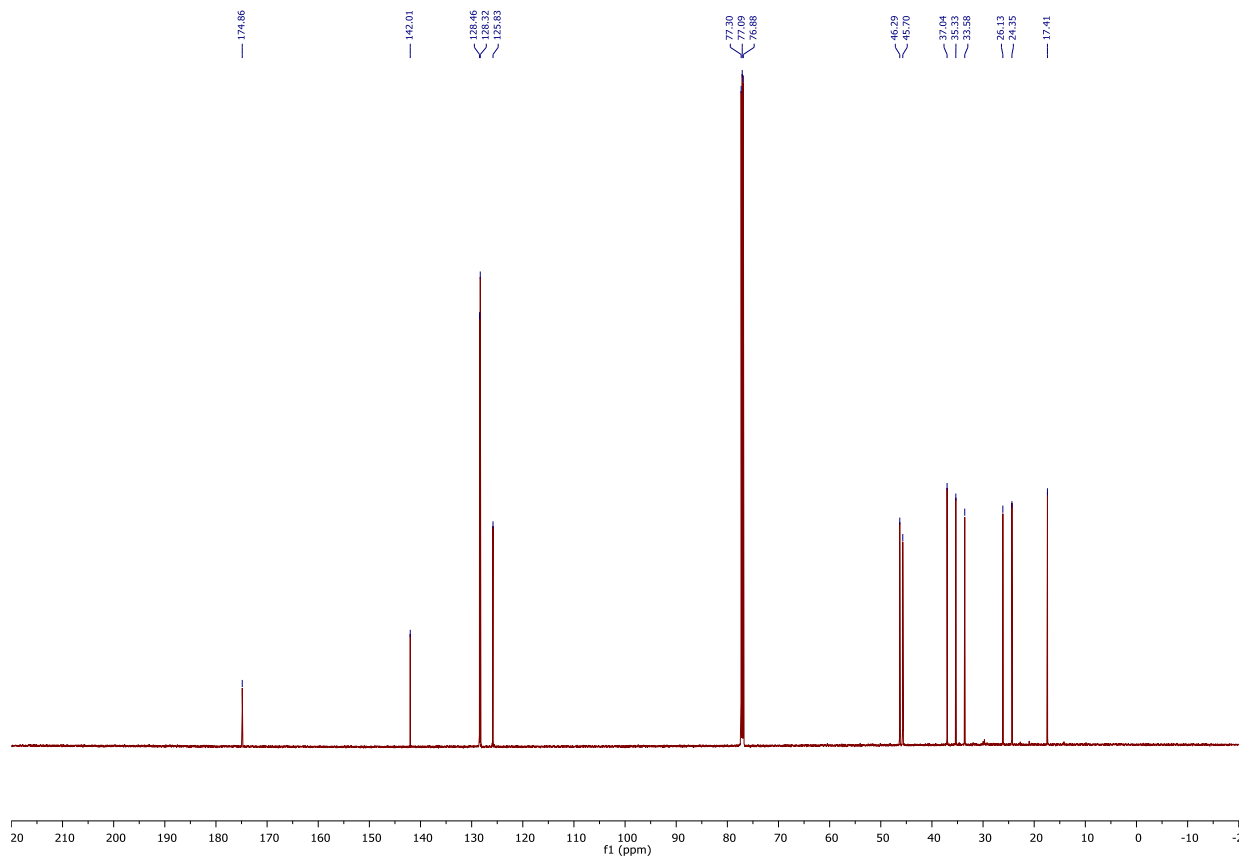

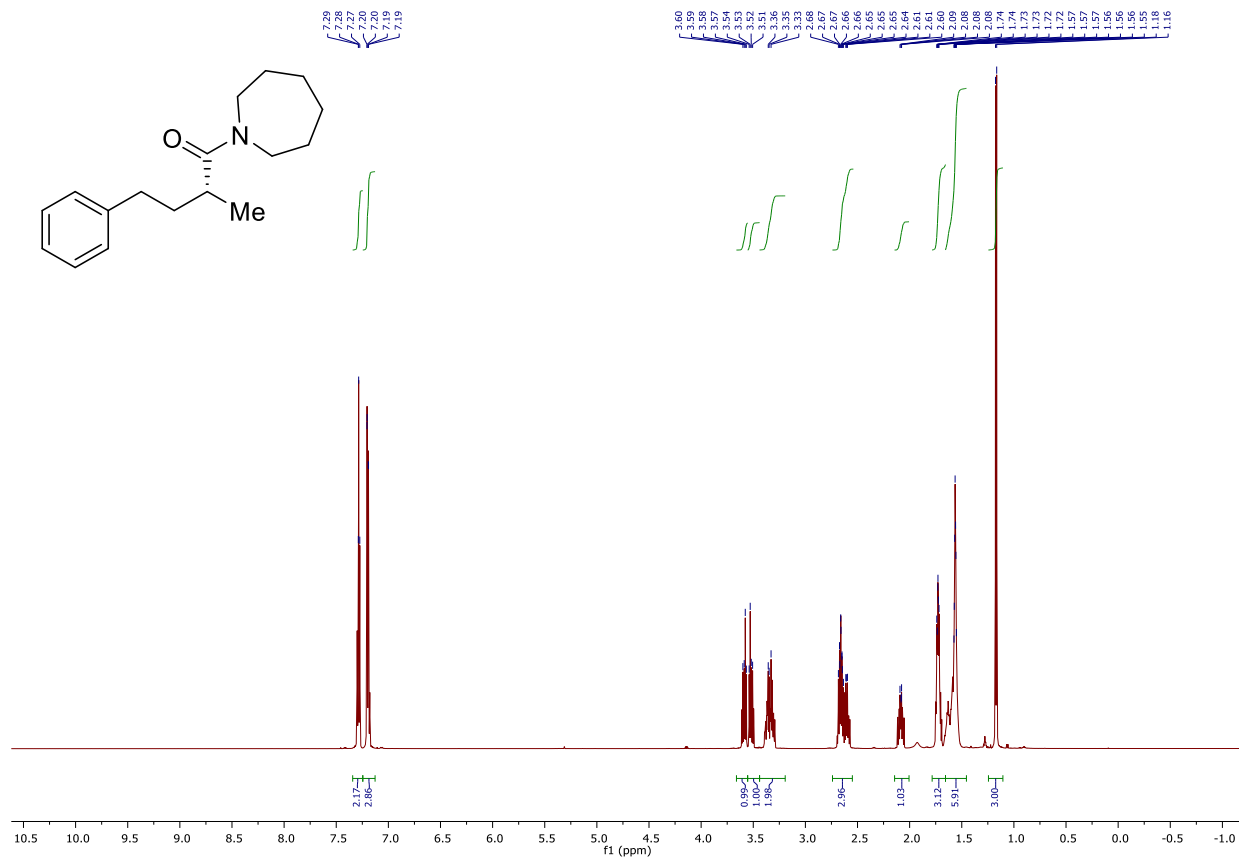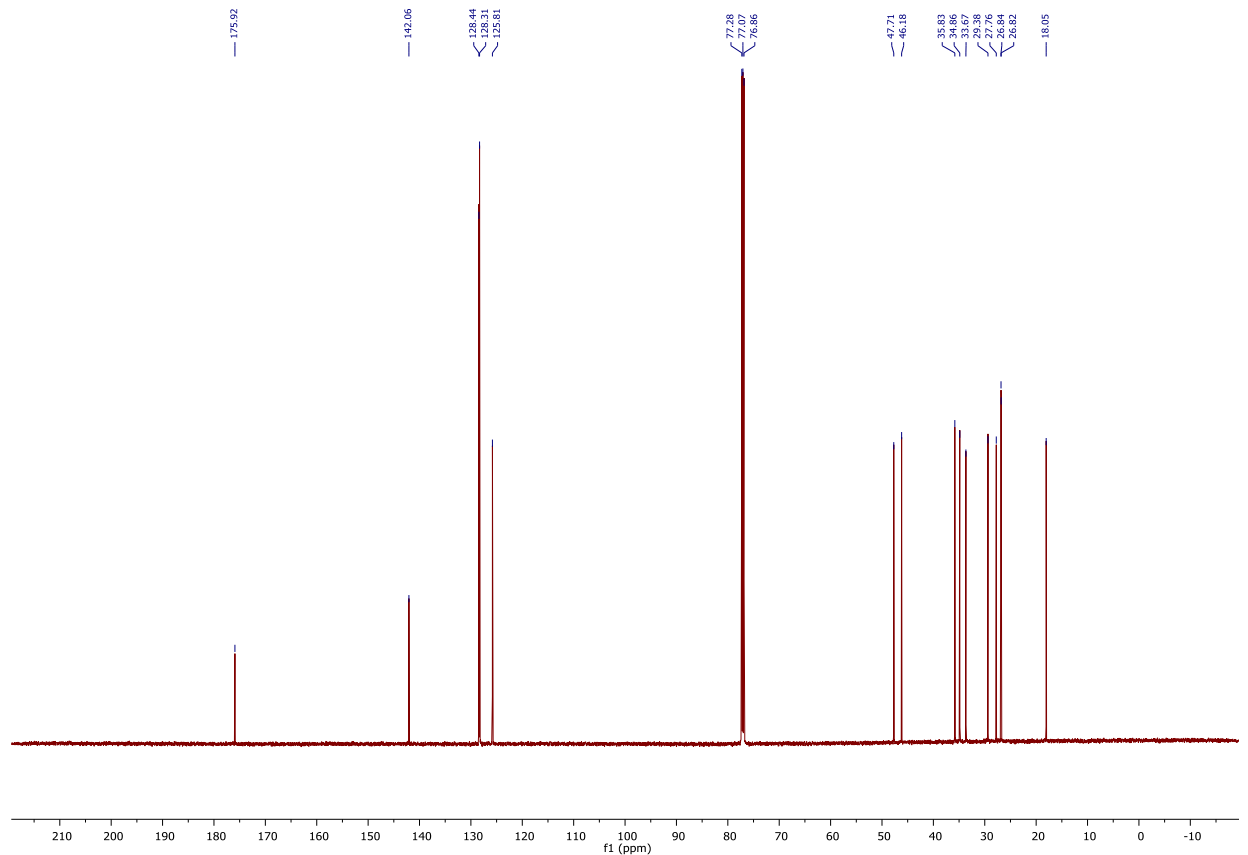

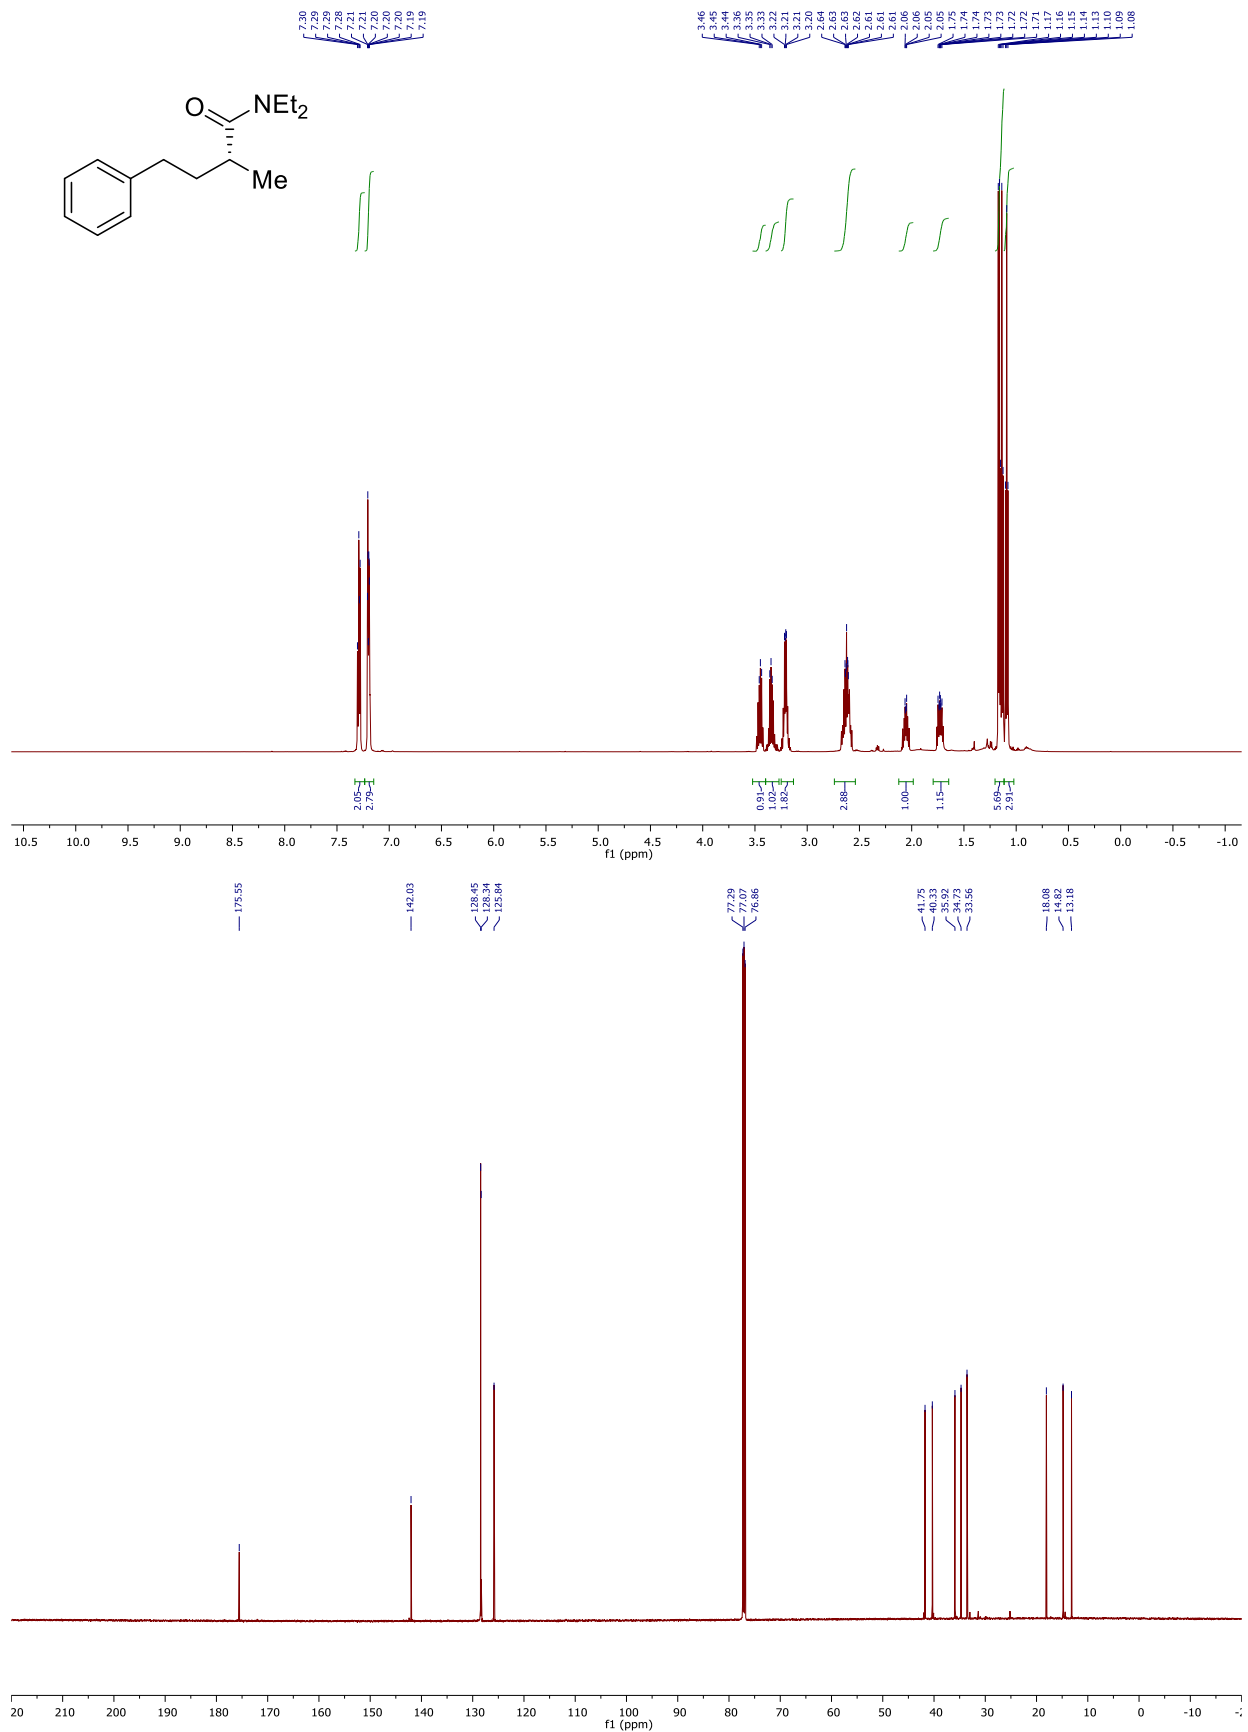

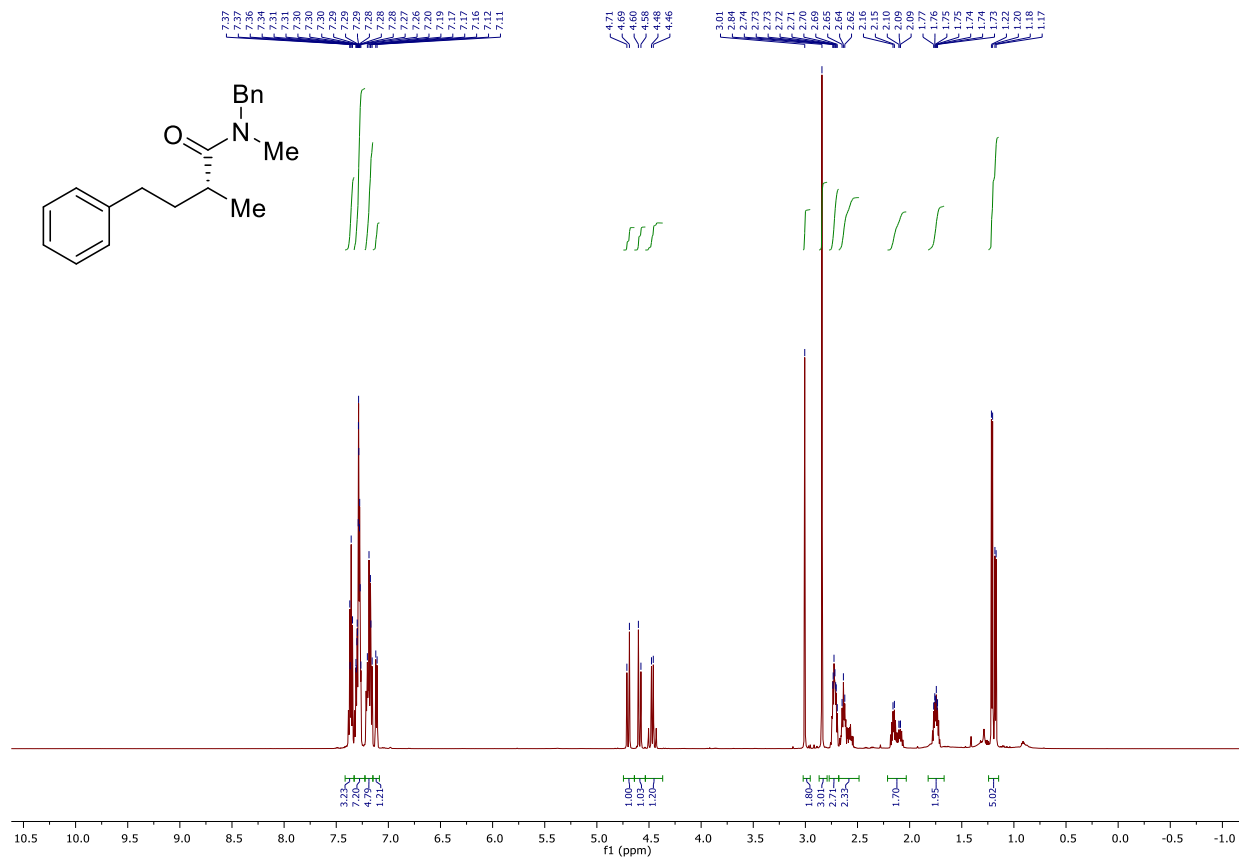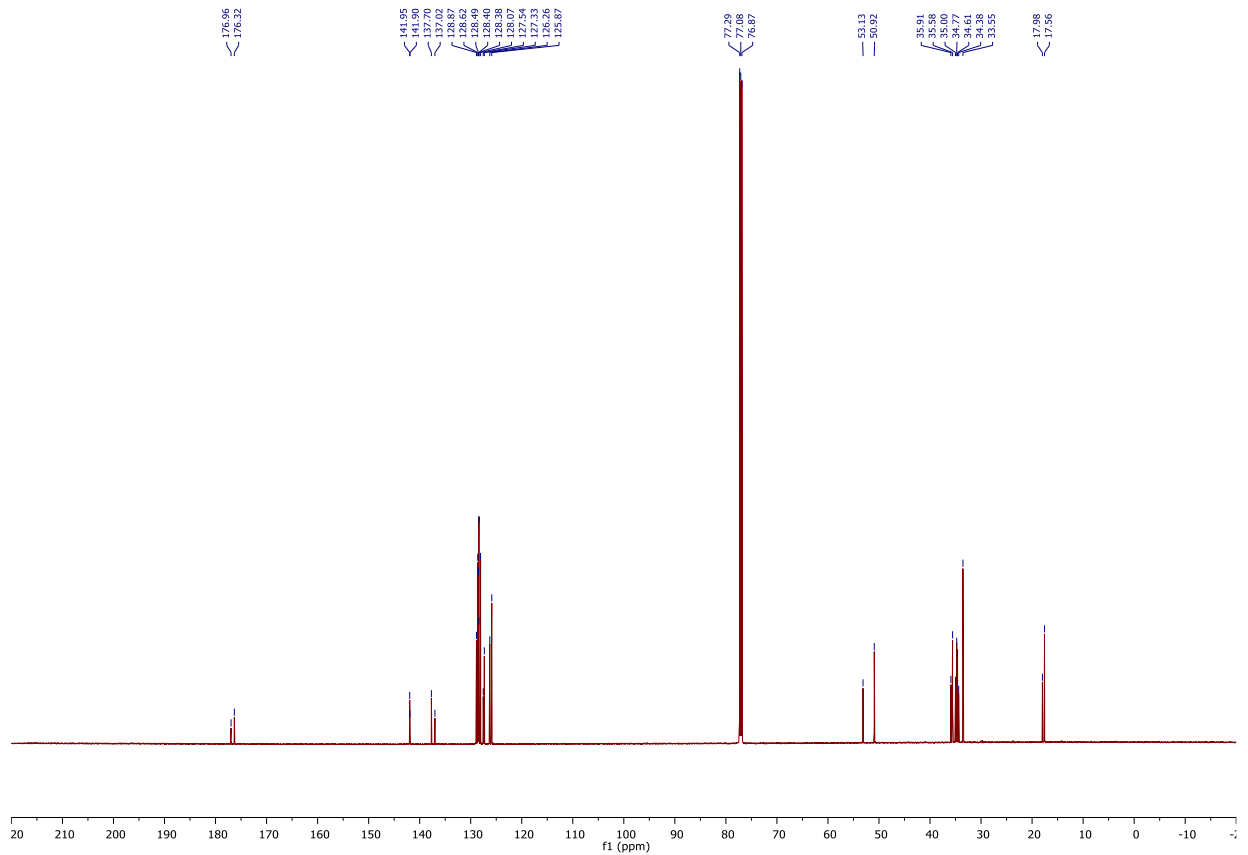

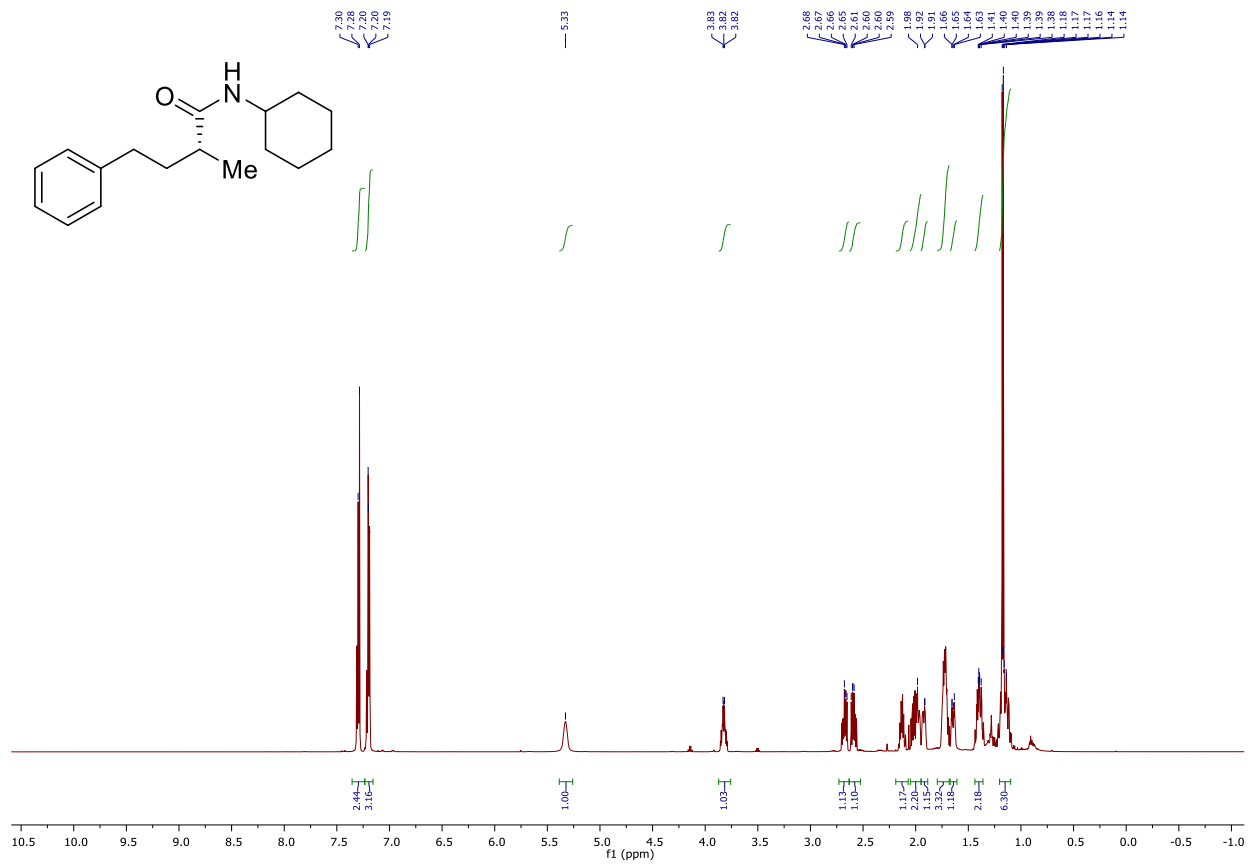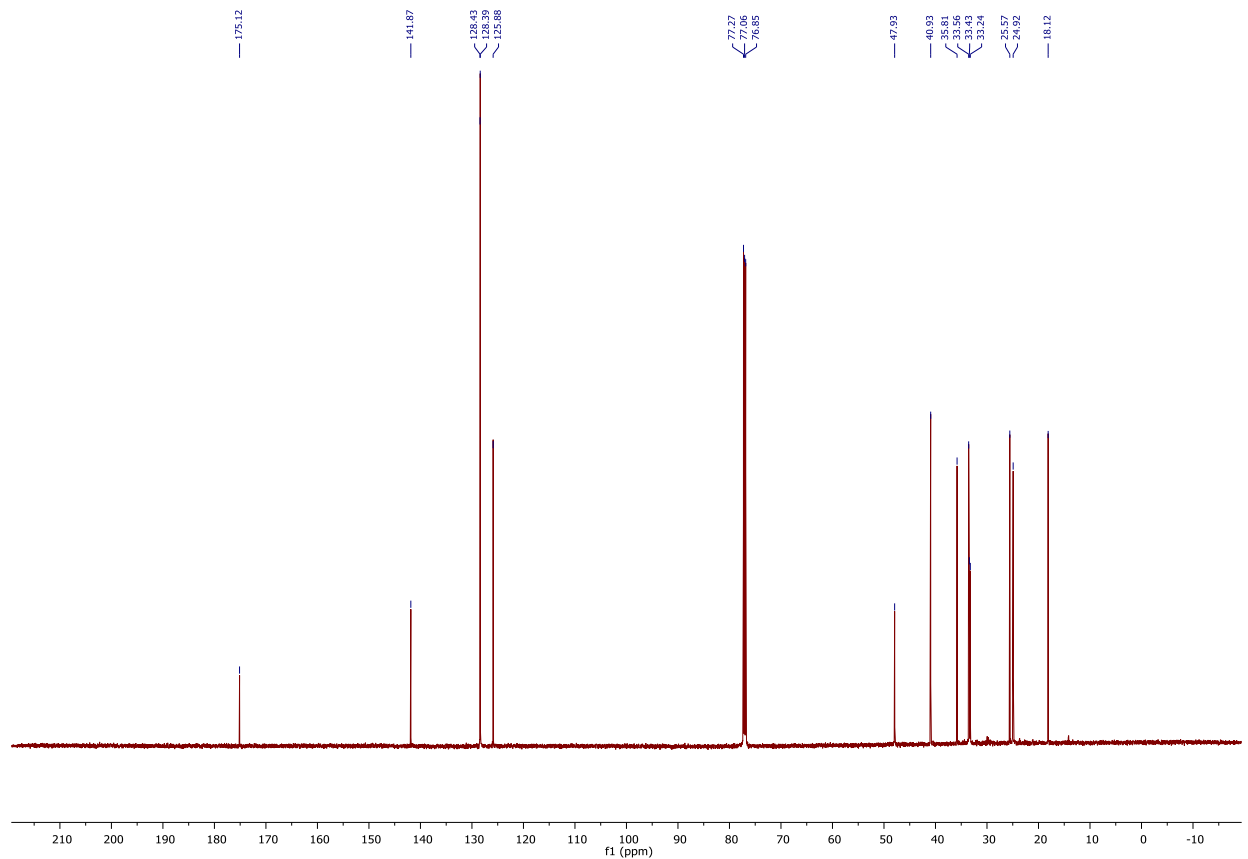

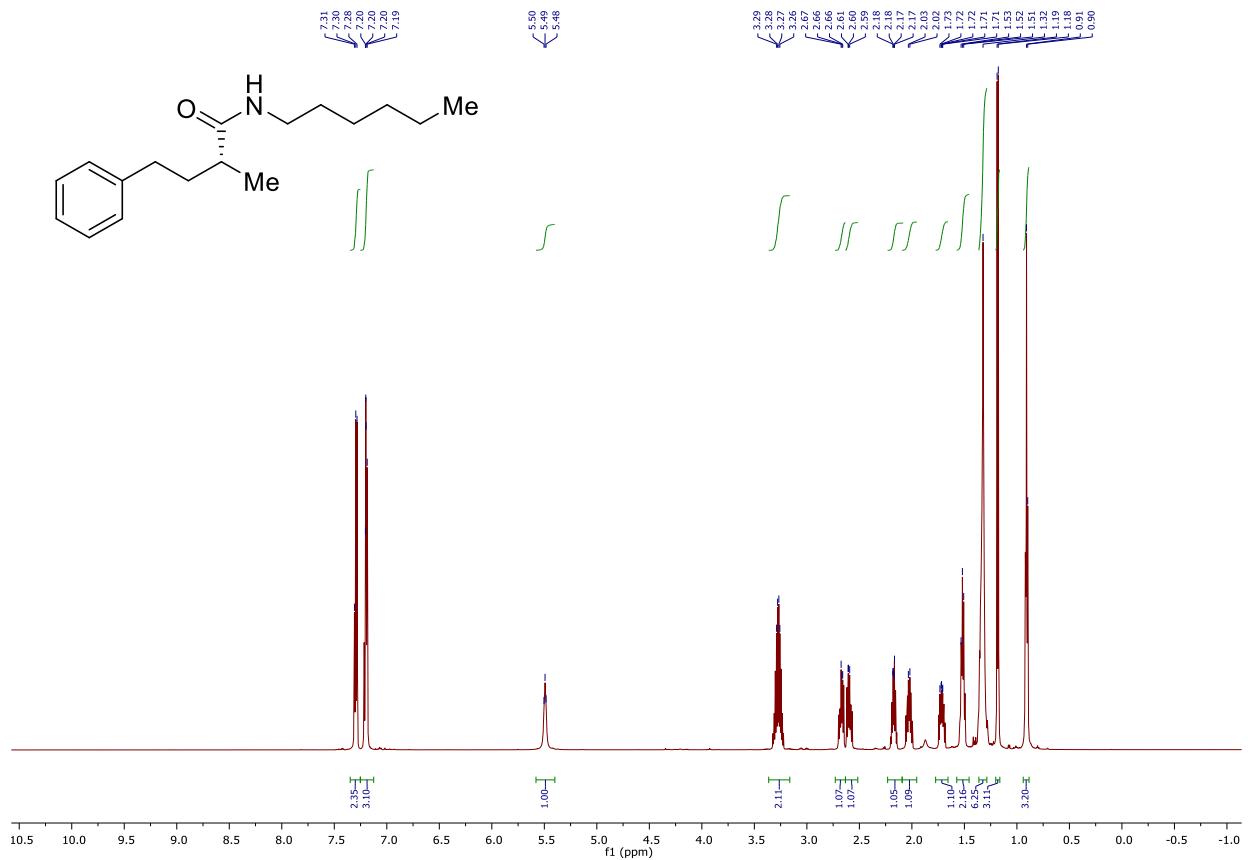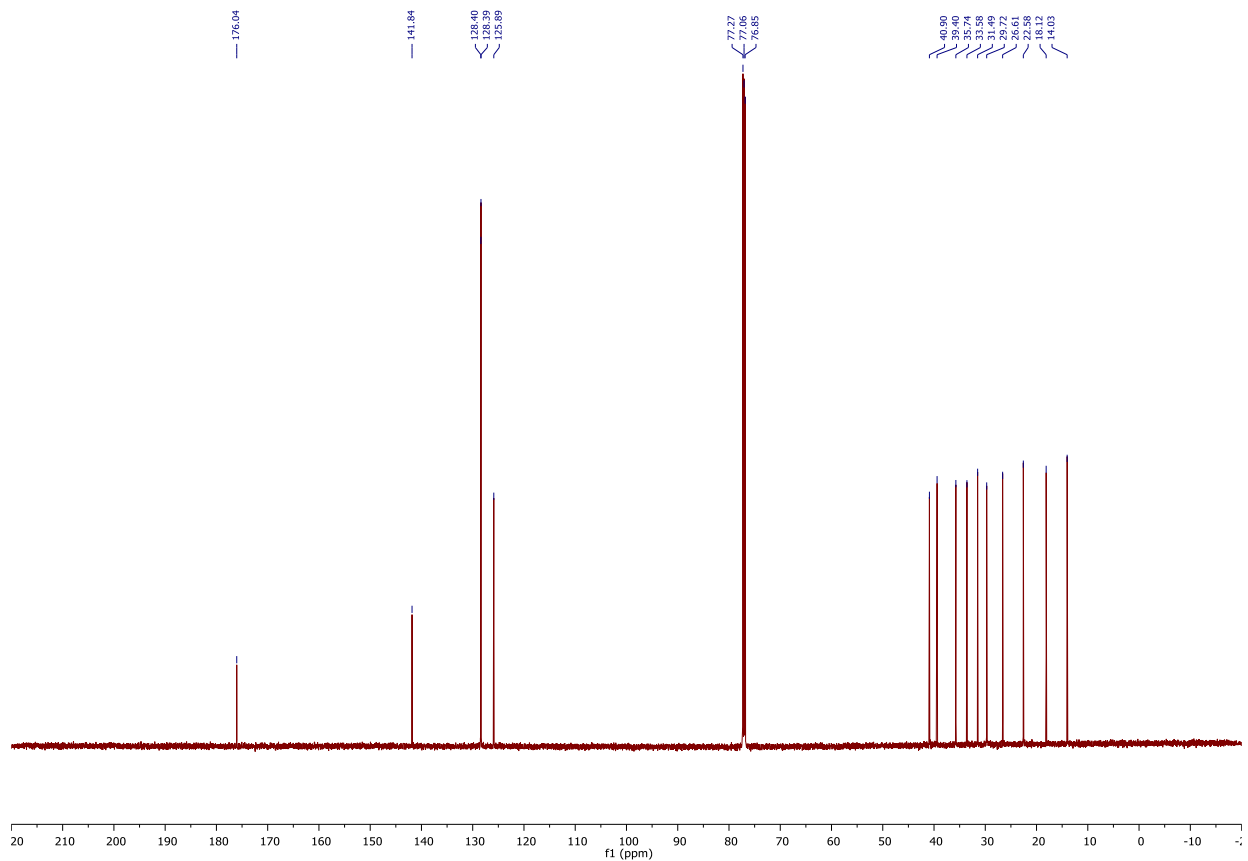

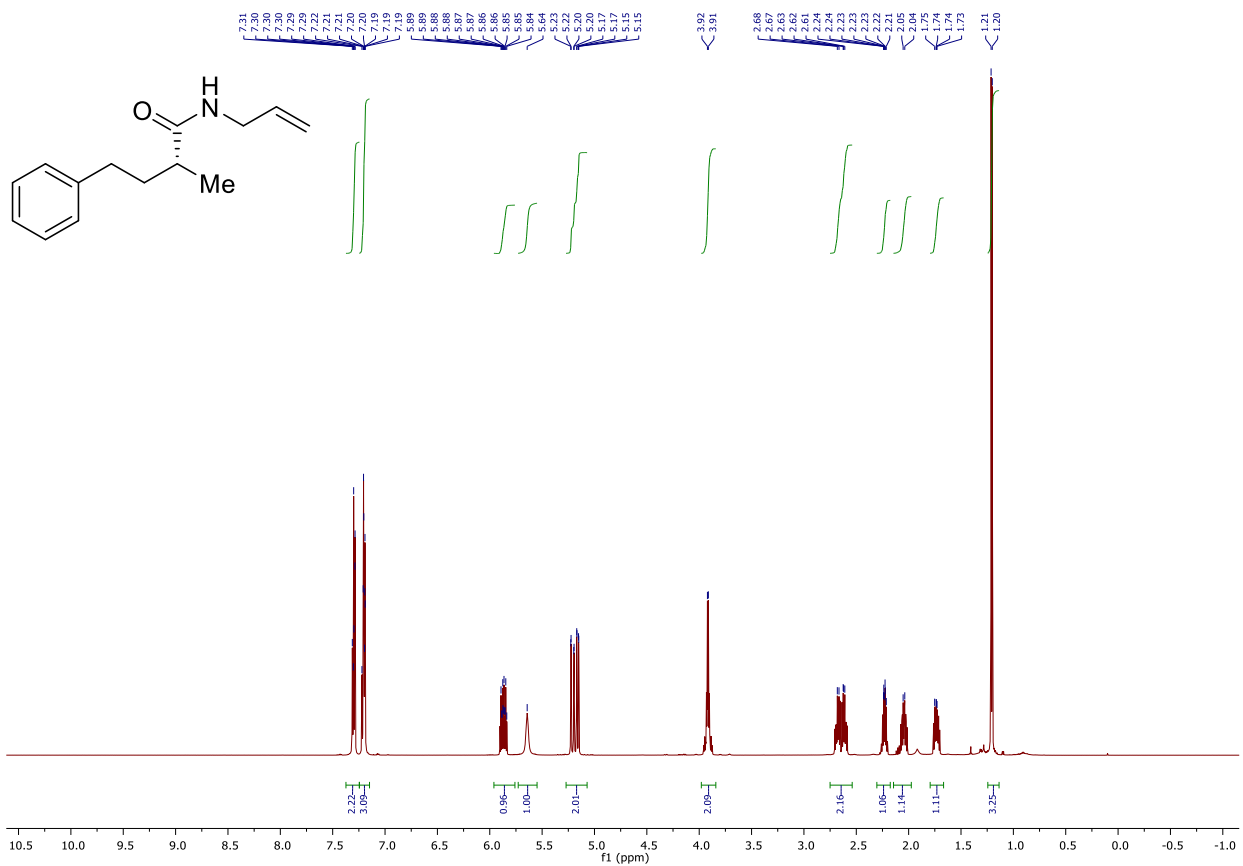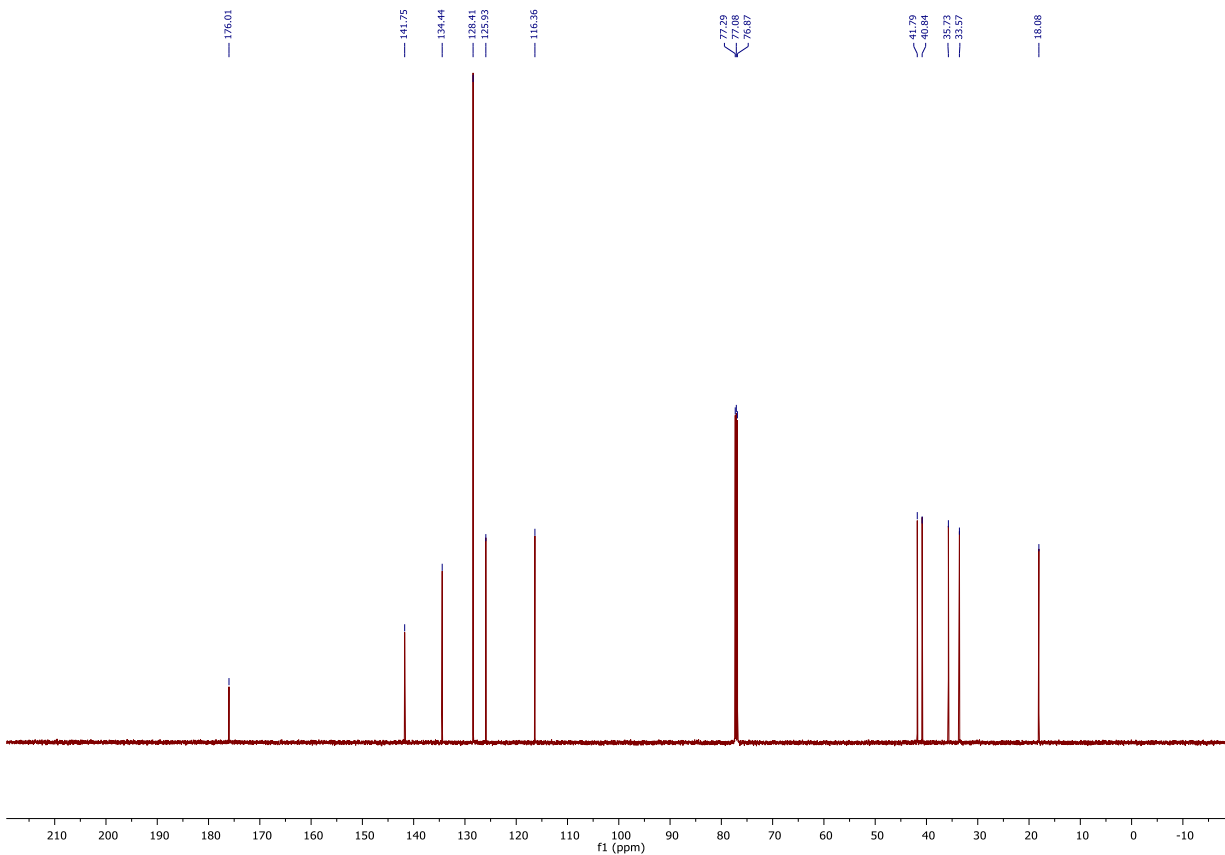



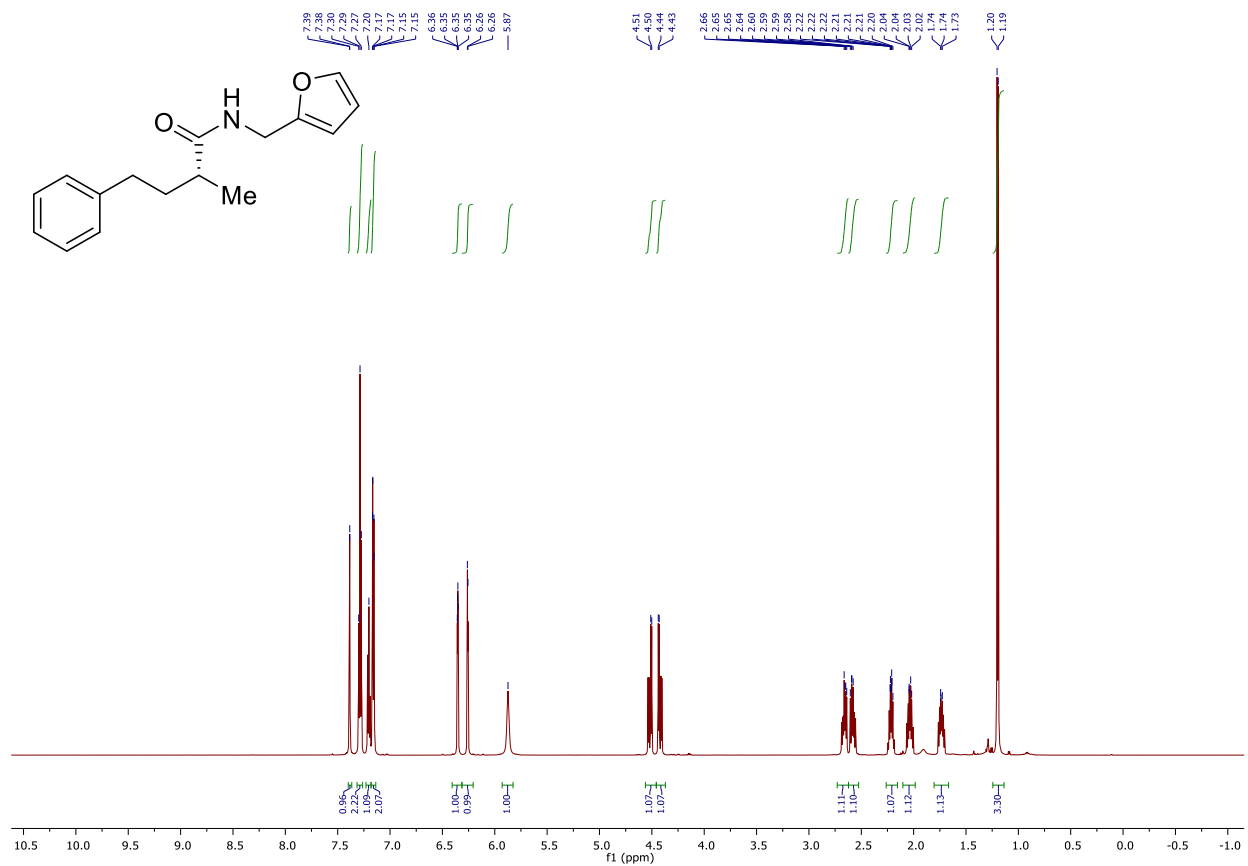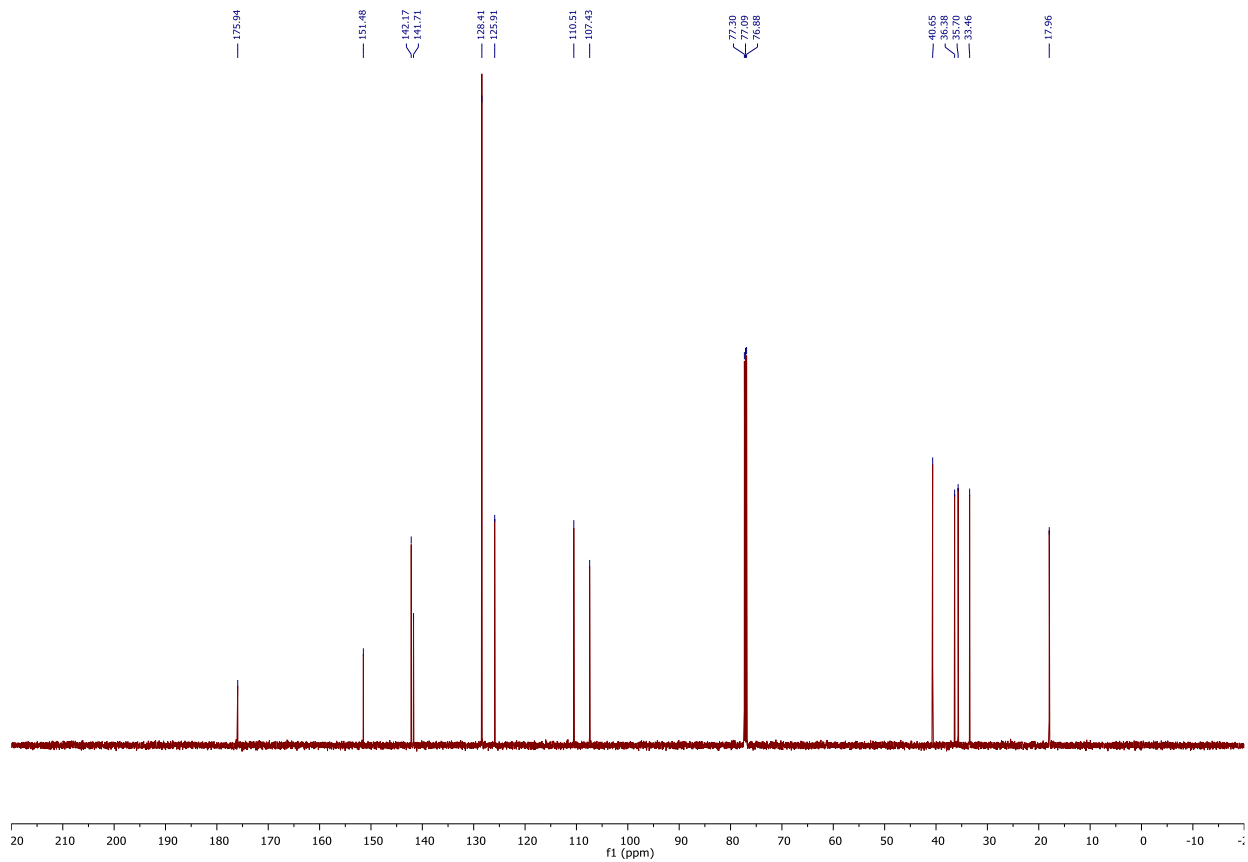

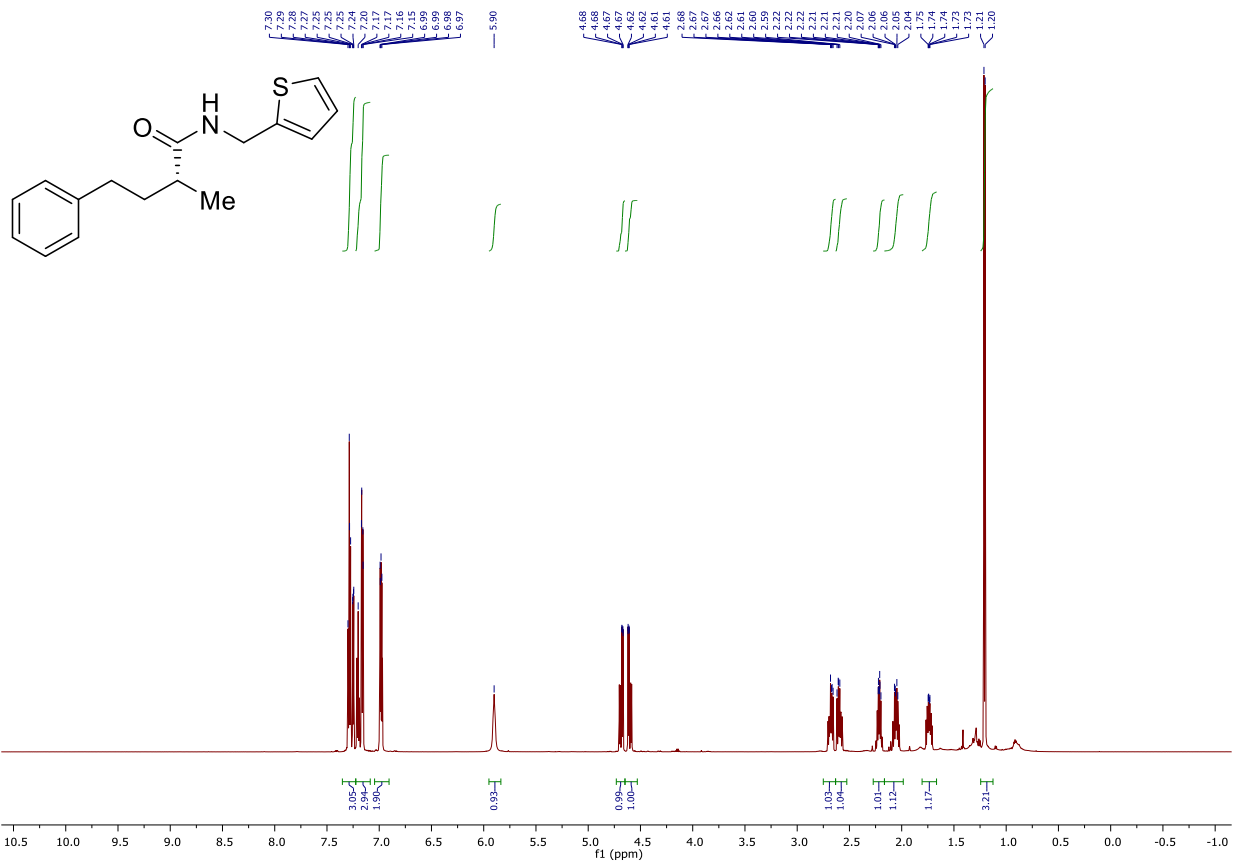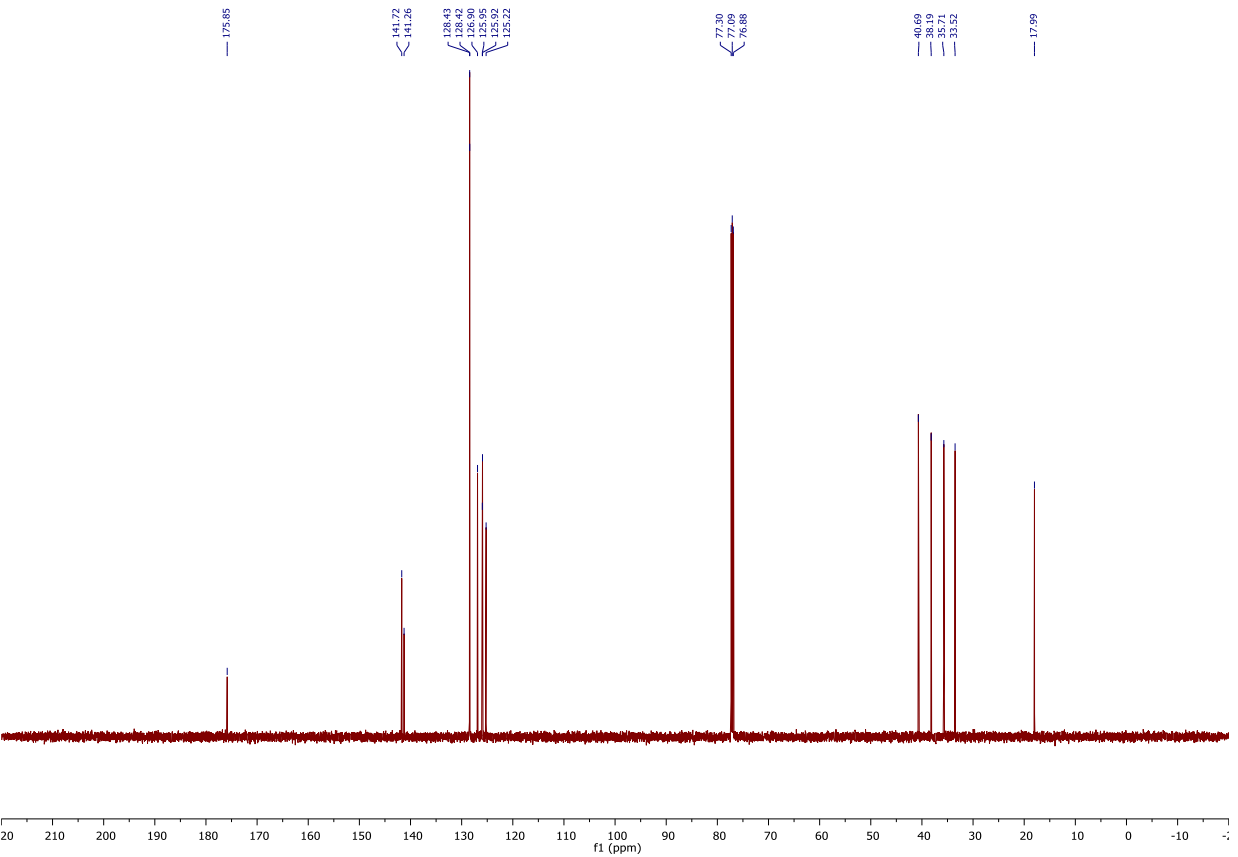

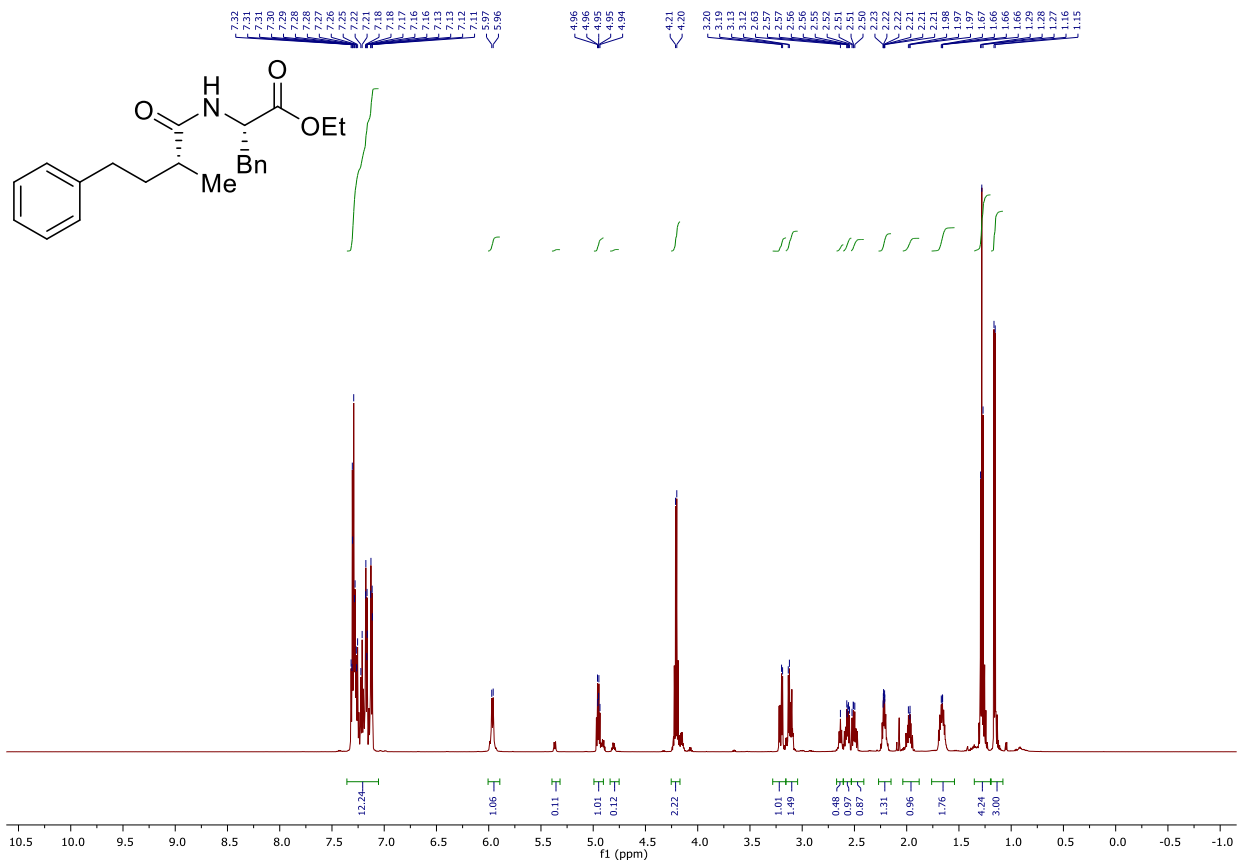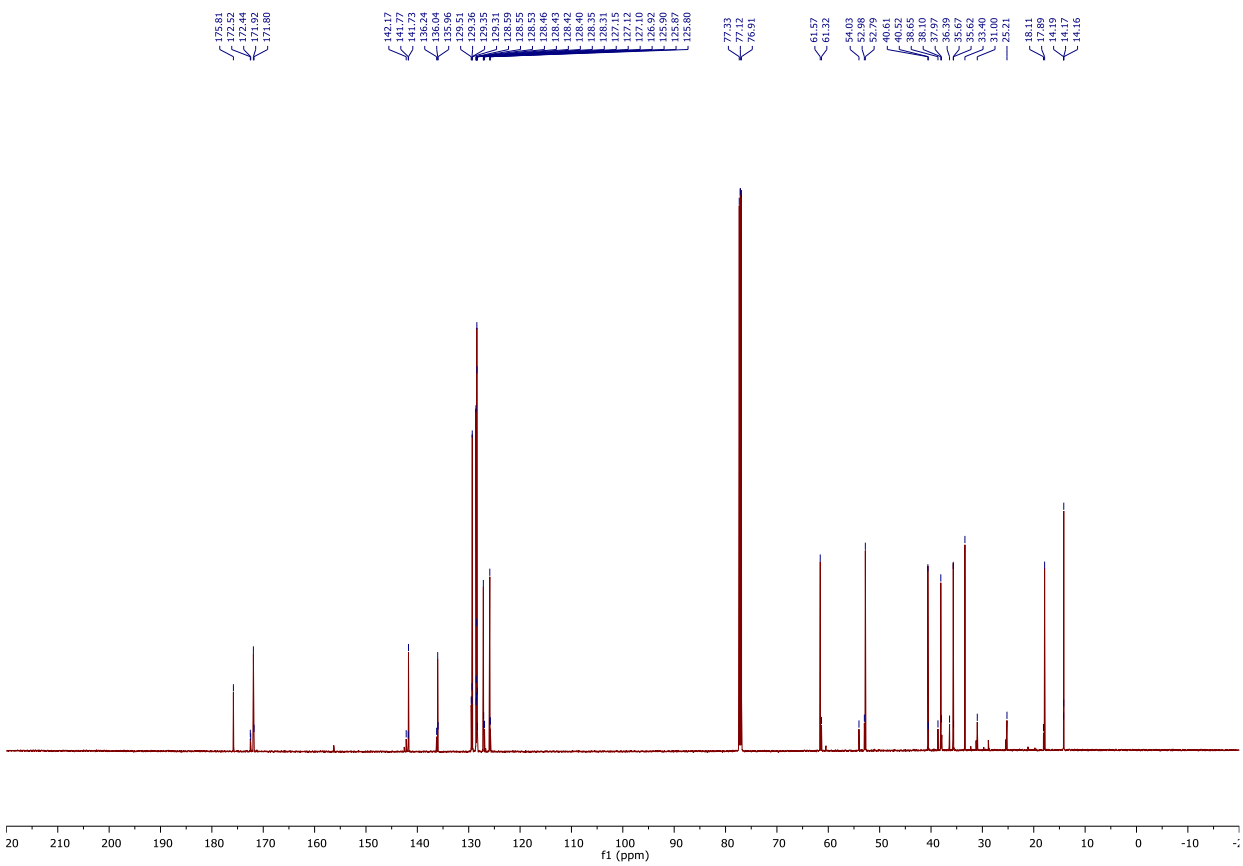

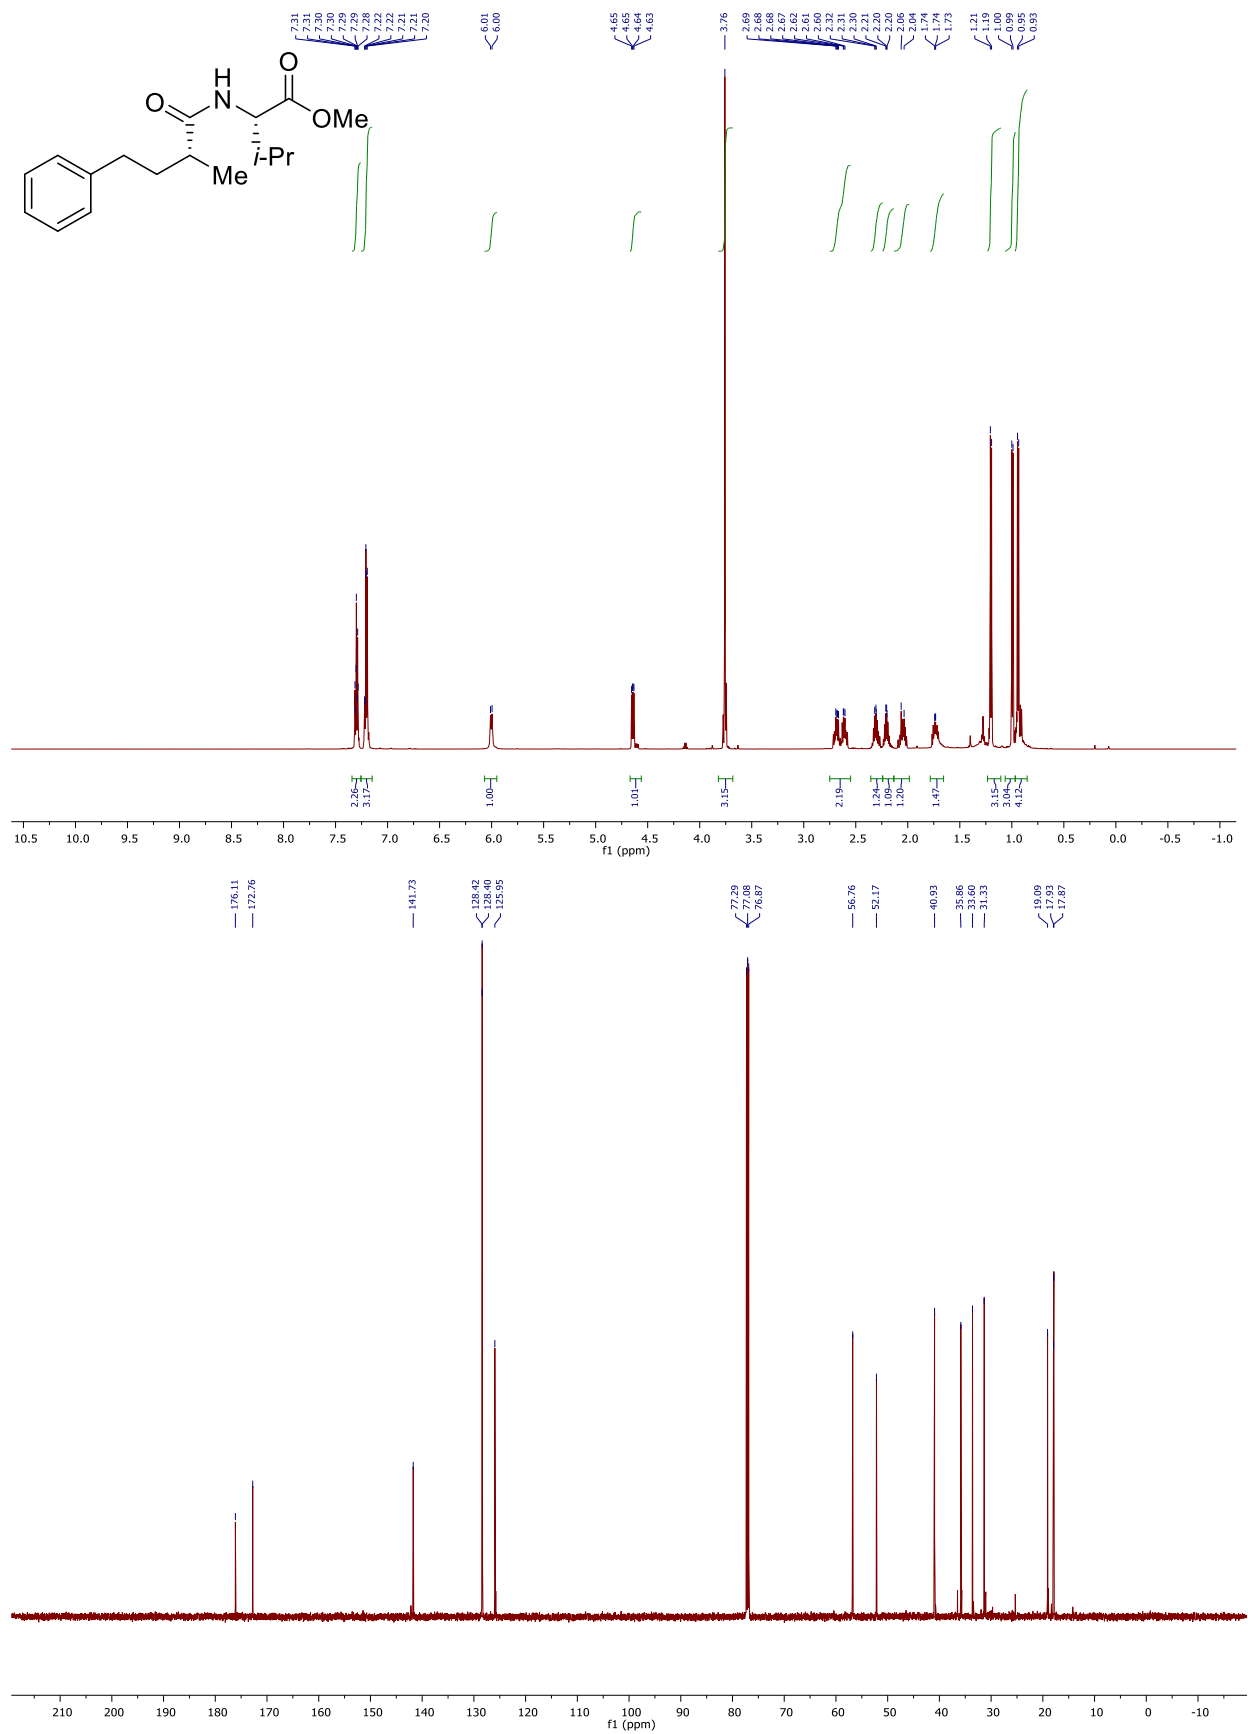

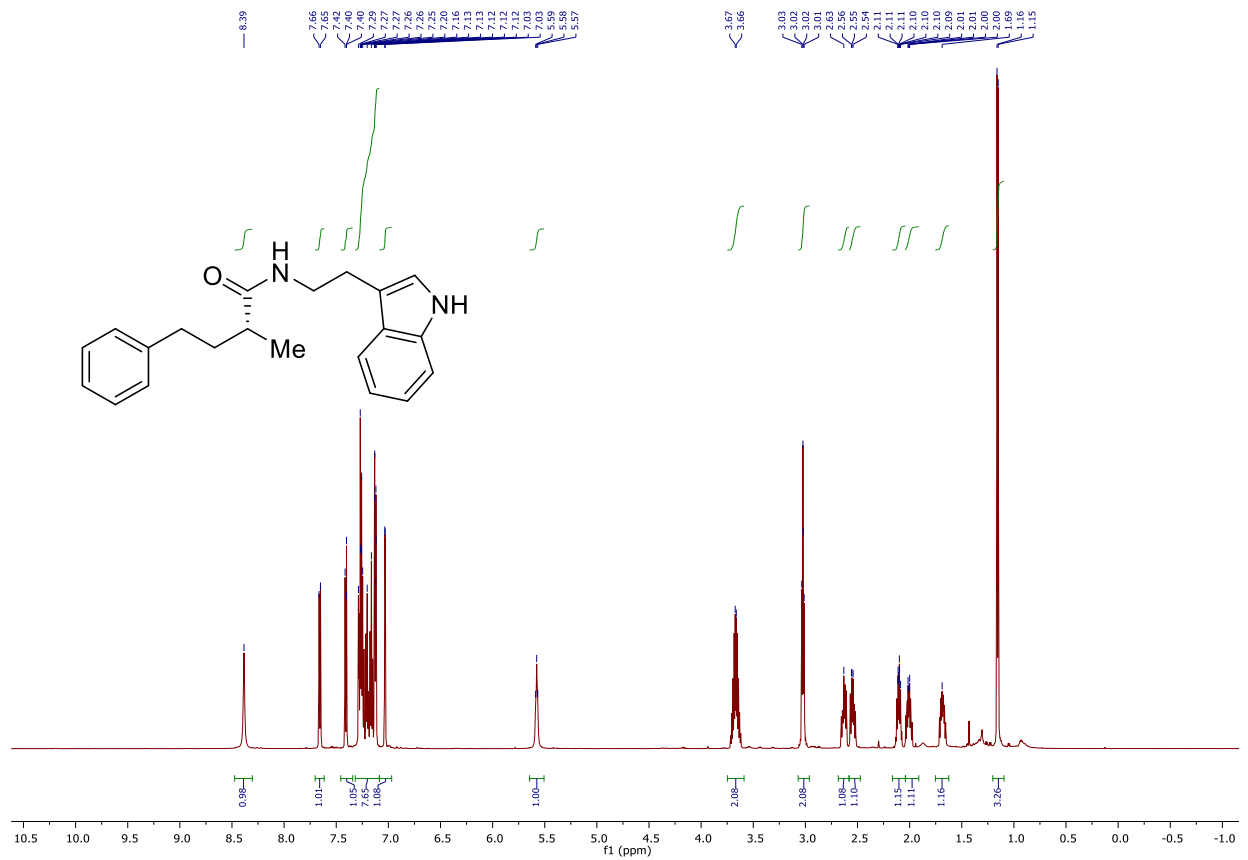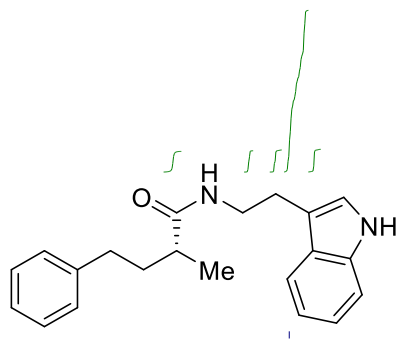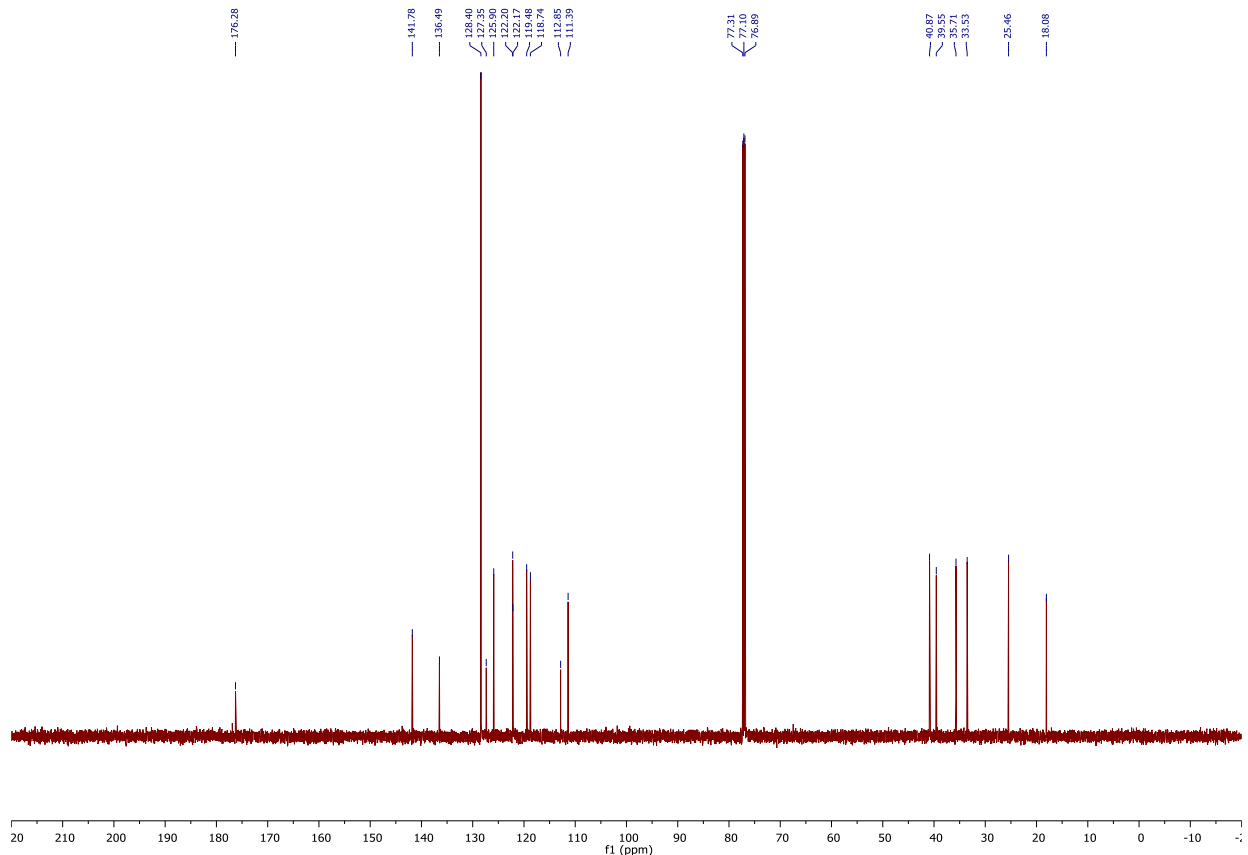

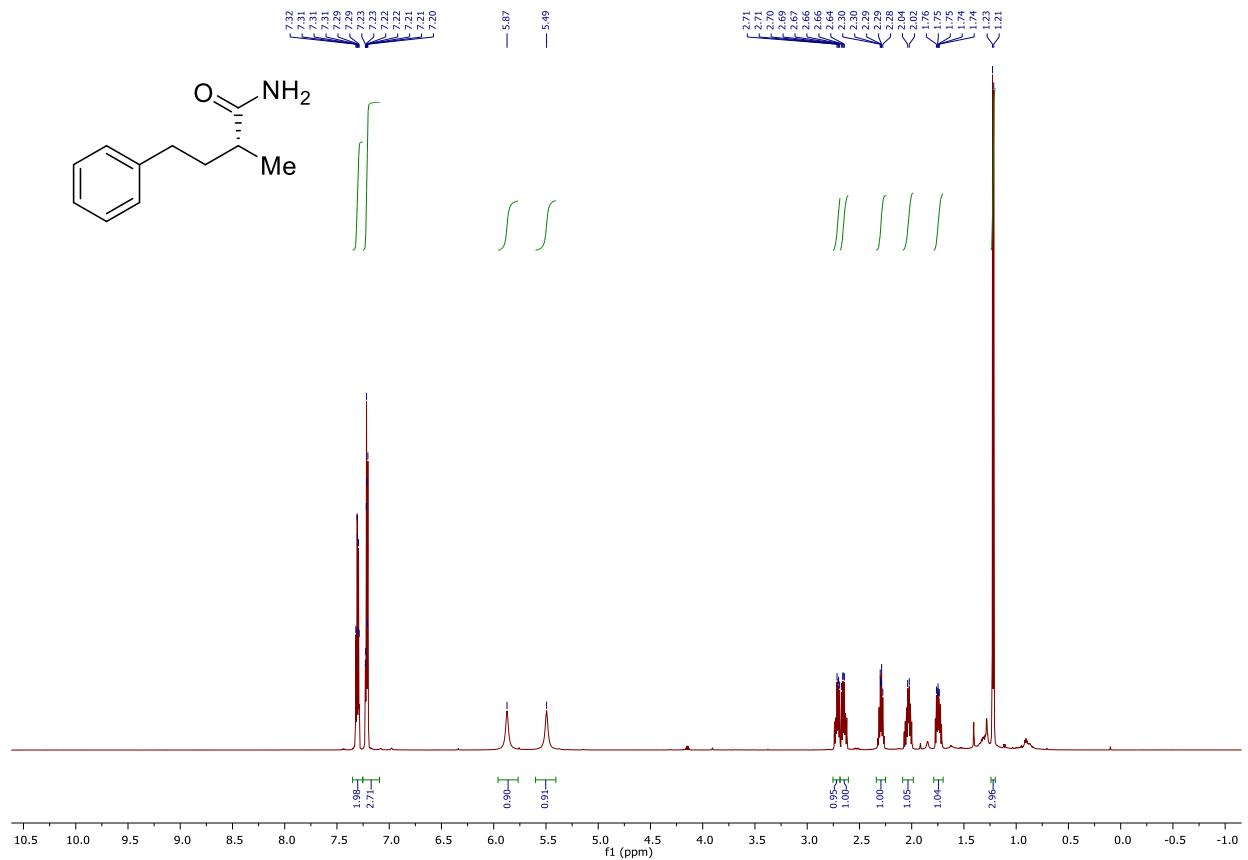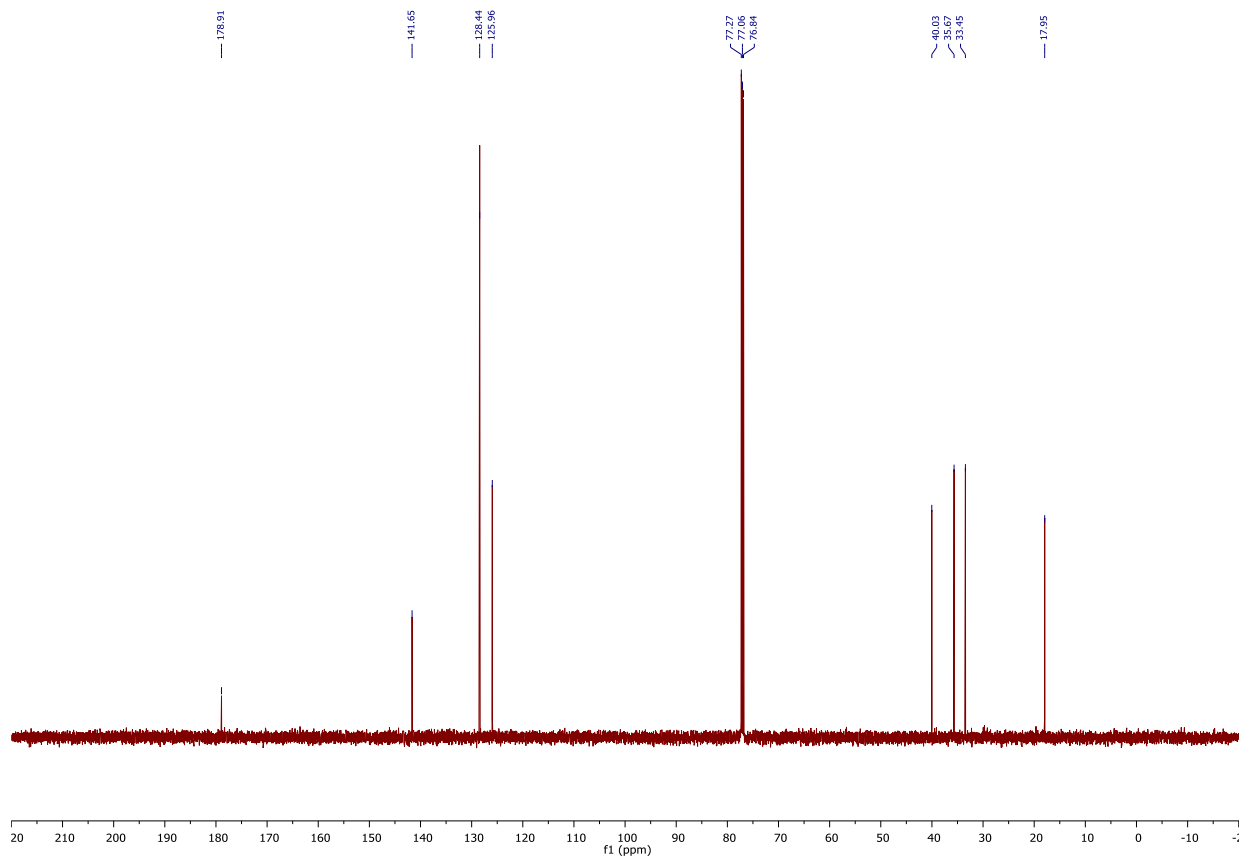

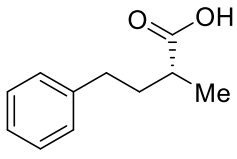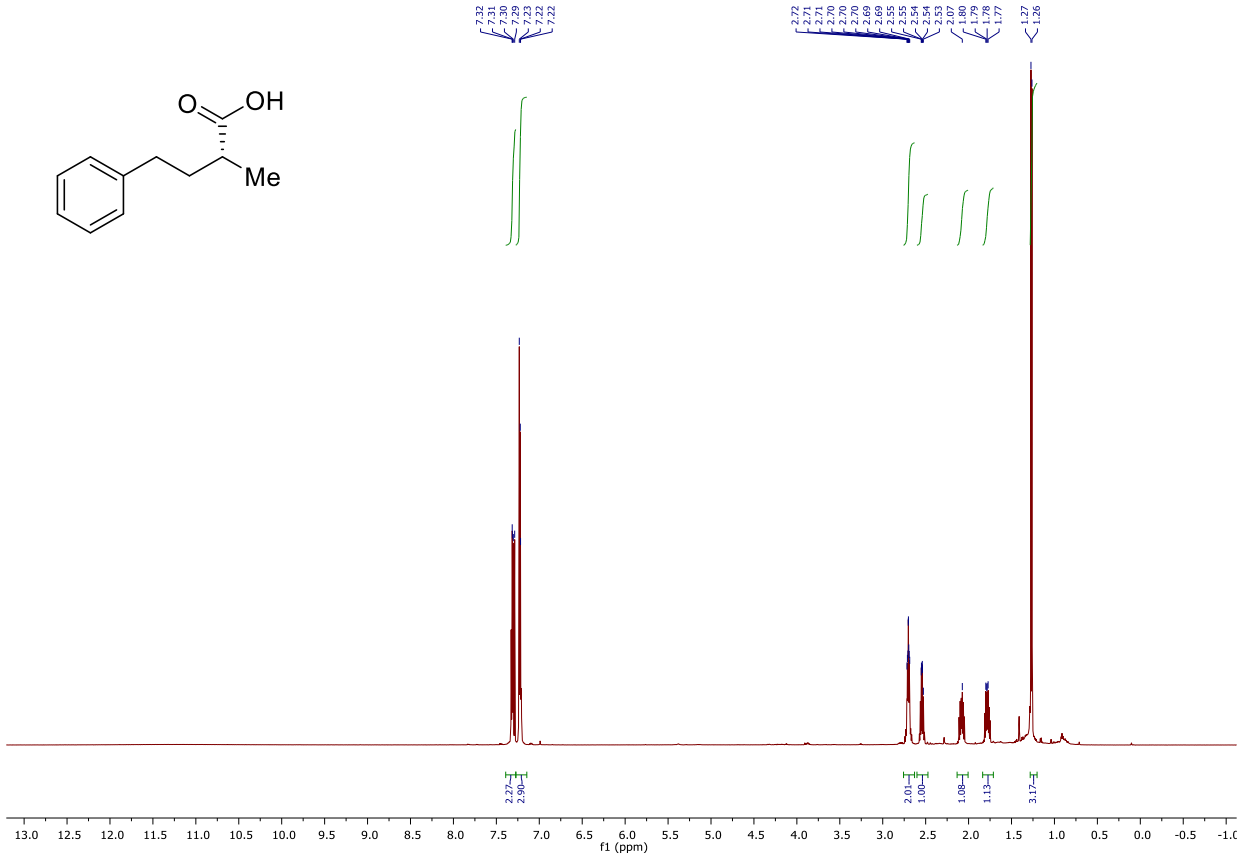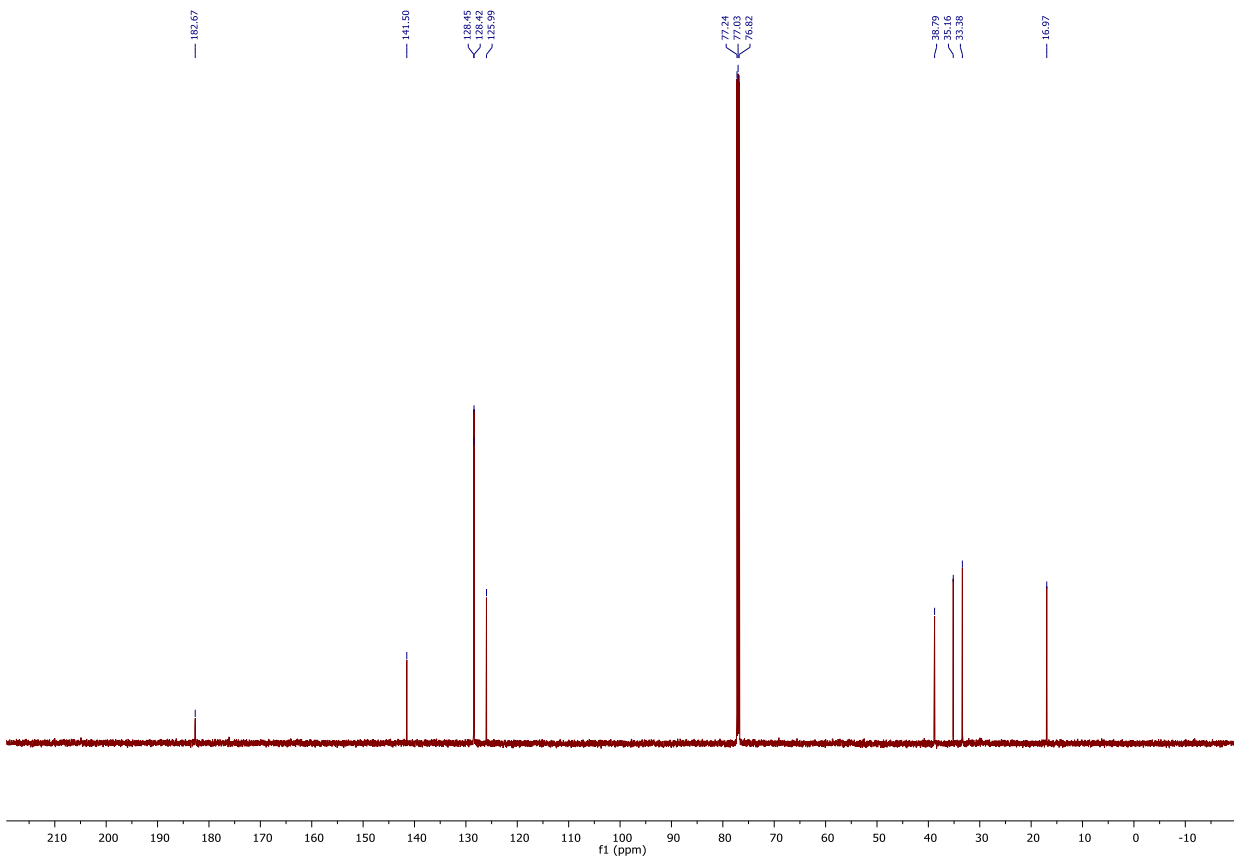

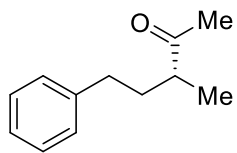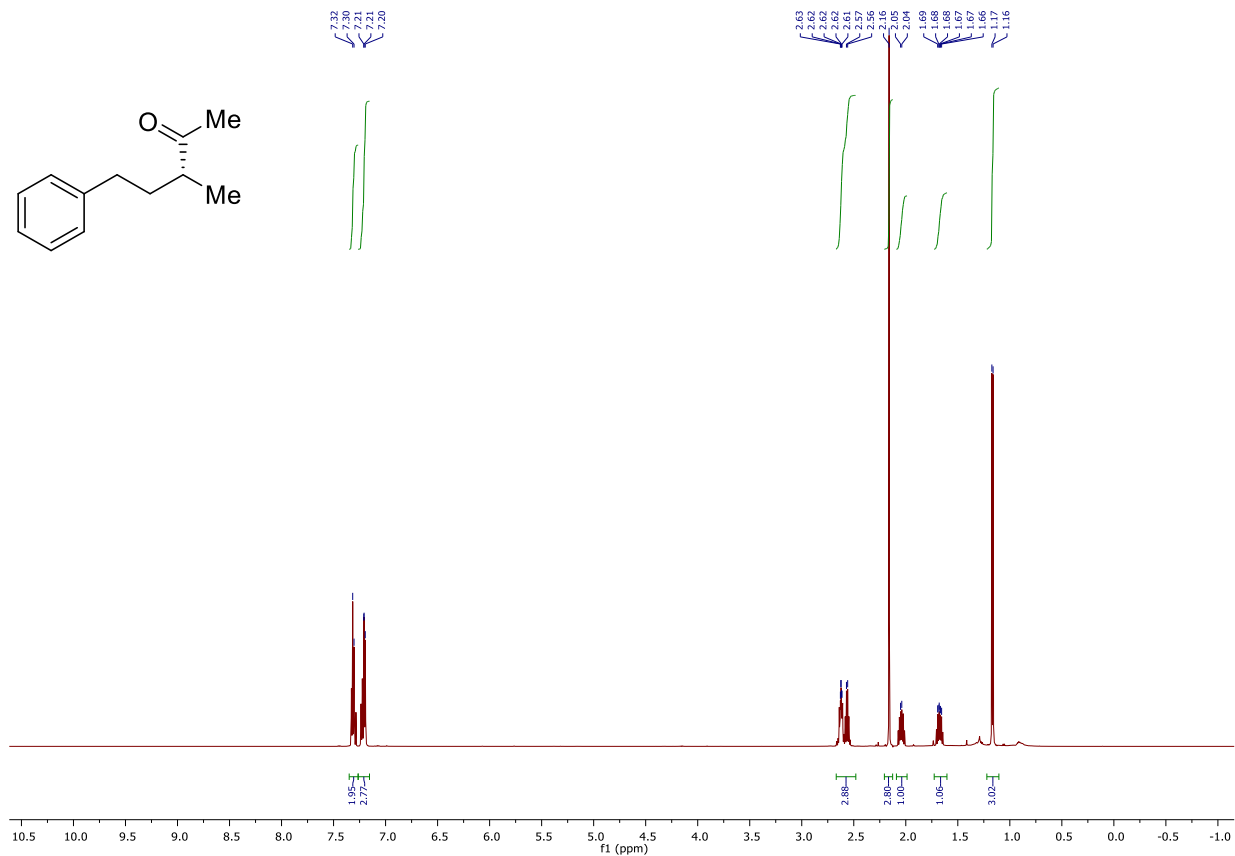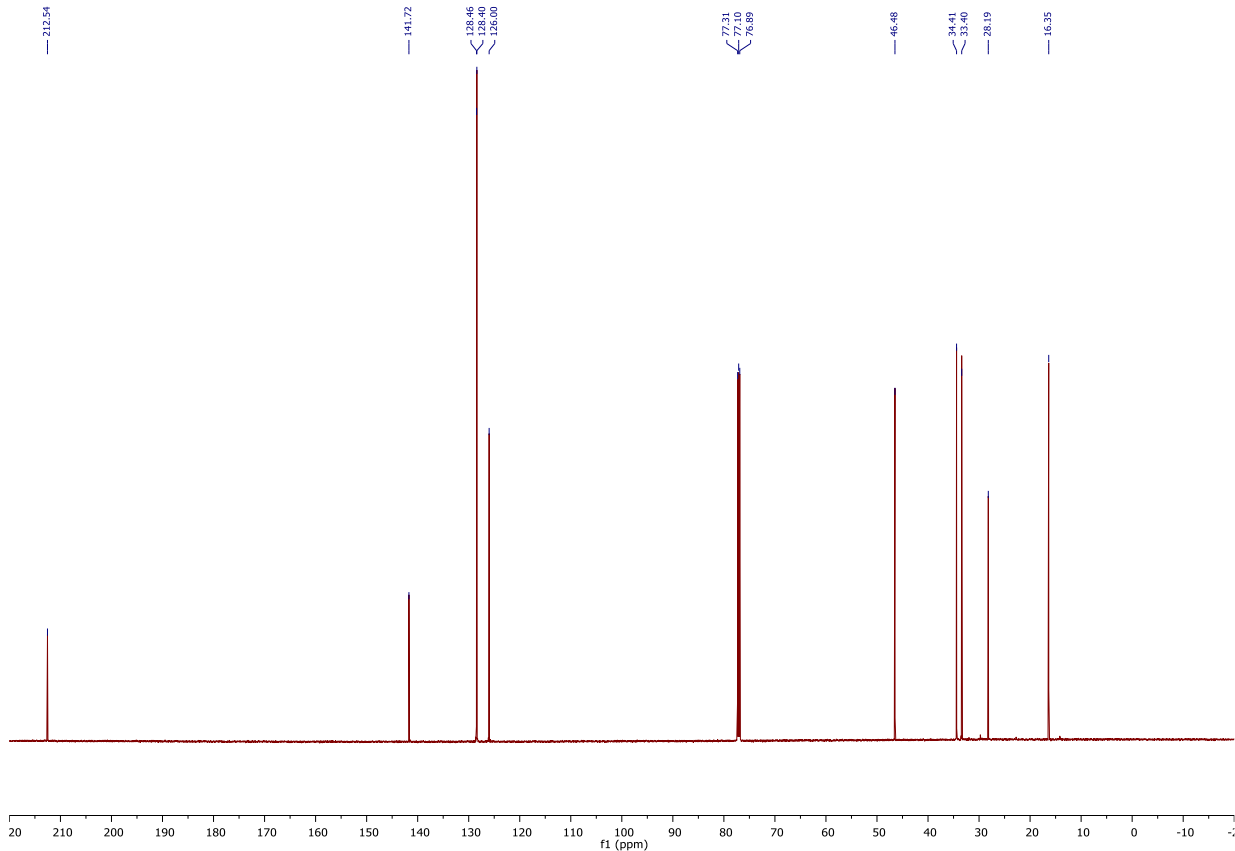



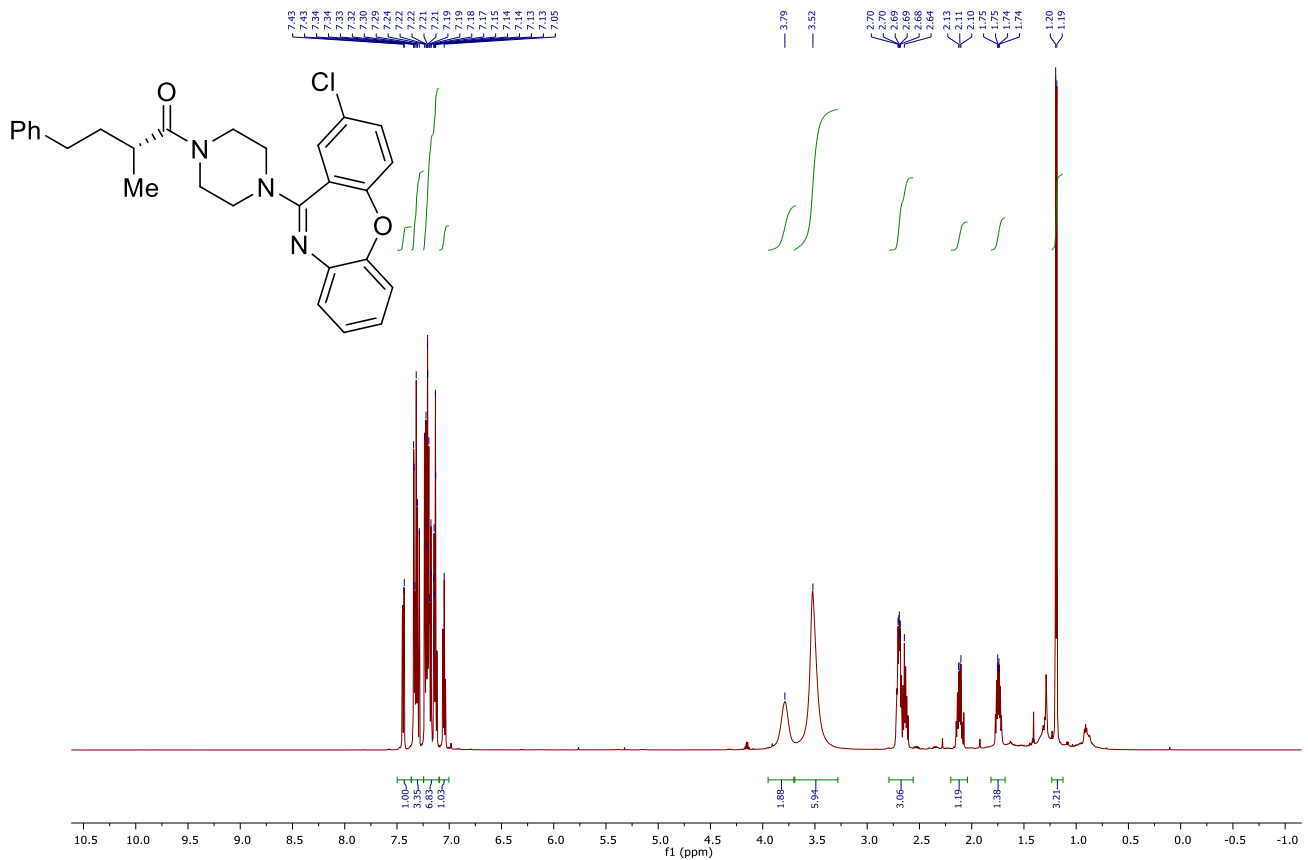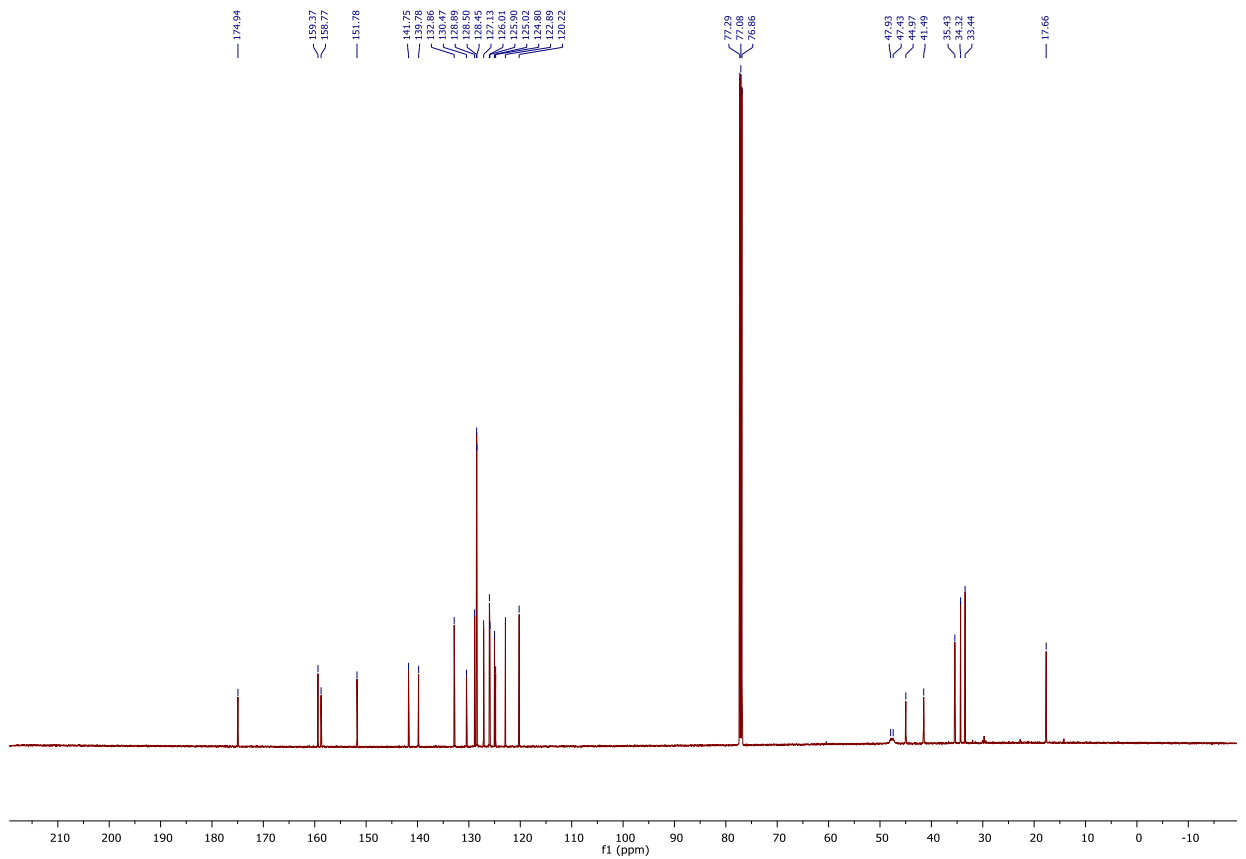

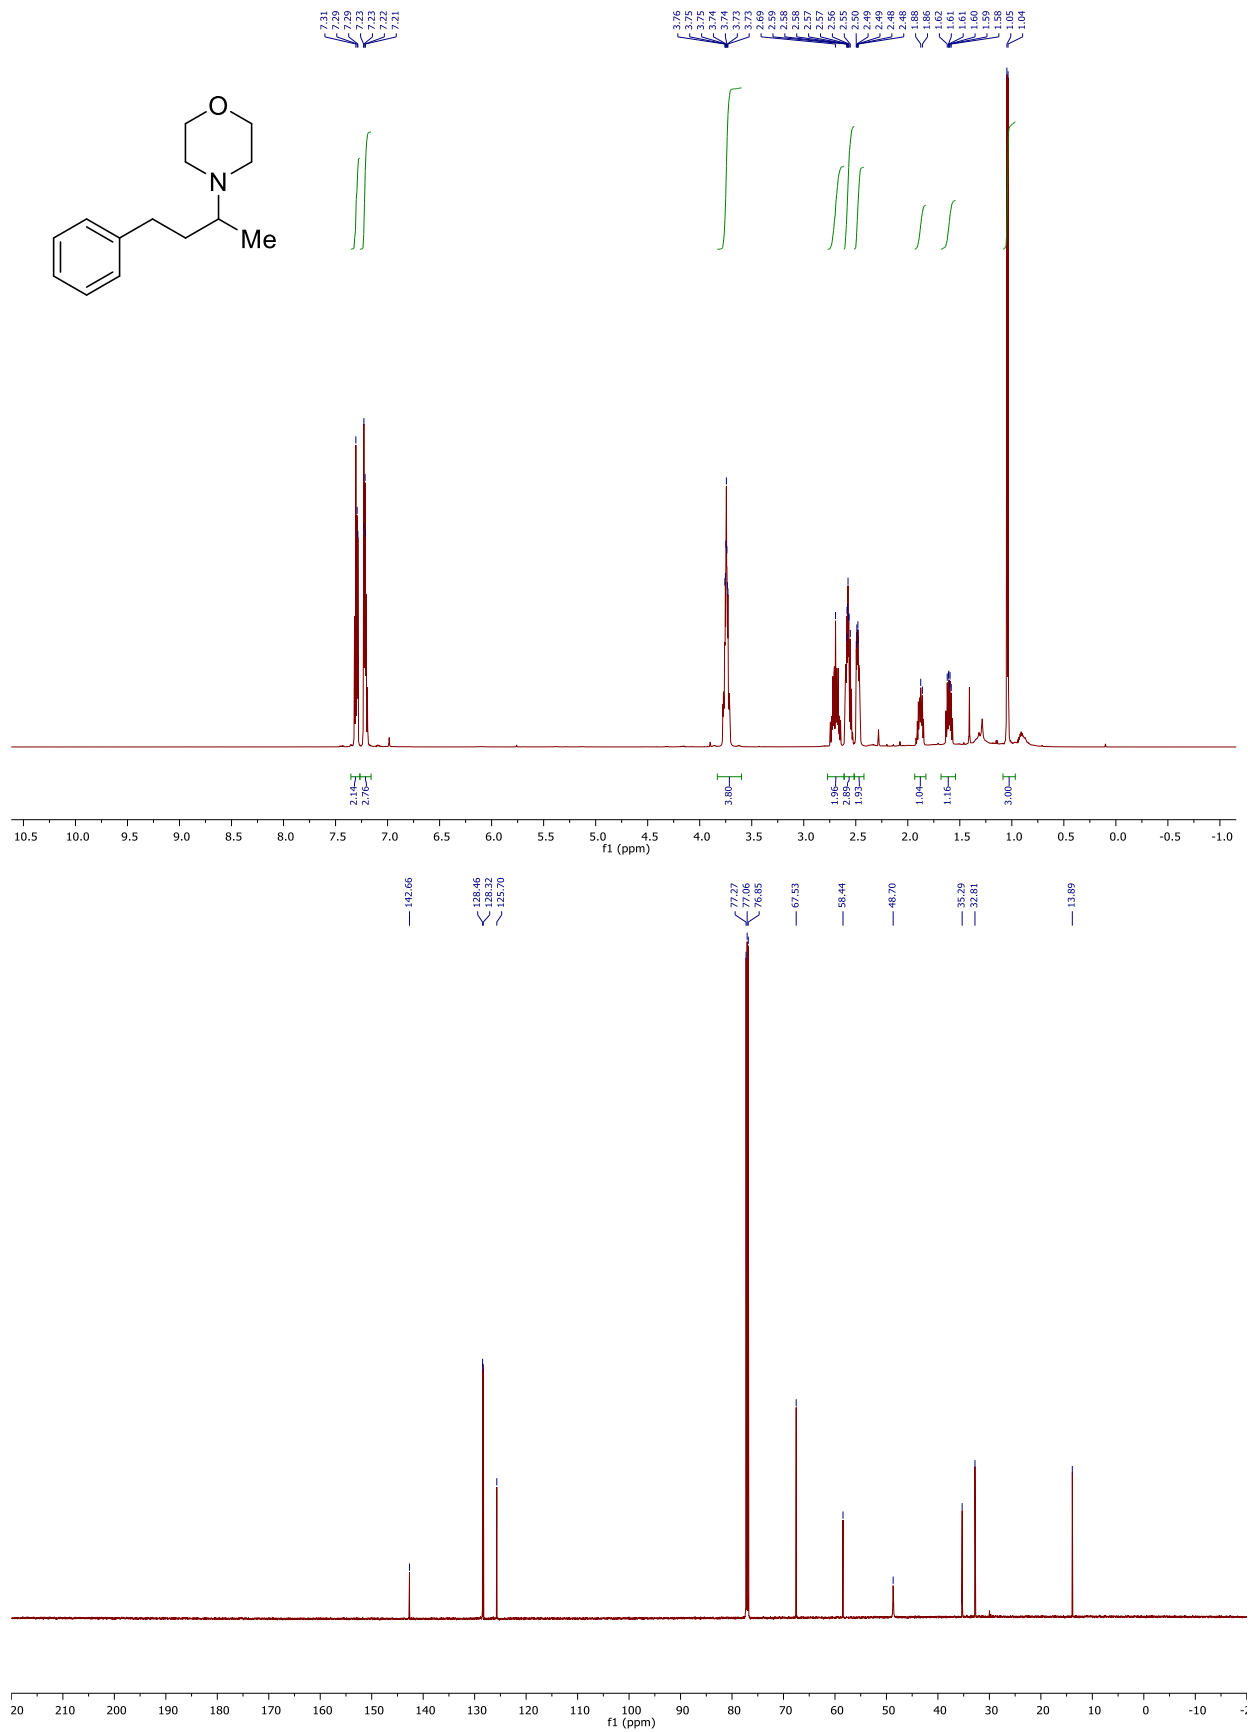

Supplement: NIHMS1029827-supplement-Supp_info.pdf [file NIHMS1029827-supplement-Supp_info.pdf]
